# Supplementary material
Source: PubMed Central journal article supplement (PMC11080285)
Supplement: mmc1.pdf [file mmc1.pdf]

**Supplemental information**

**The clinical utility and diagnostic  
implementation of human subject cell  
transdifferentiation followed by RNA sequencing**

**Shenglan Li, Sen Zhao, Jefferson C. Sinson, Aleksandar Bajic, Jill A. Rosenfeld, Matthew B. Neeley, Mezthly Pena, Kim C. Worley, Lindsay C. Burrage, Monika Weisz-Hubshman, Shamika Ketkar, William J. Craigen, Gary D. Clark, Seema Lalani, Carlos A. Bacino, Keren Machol, Hsiao-Tuan Chao (趙孝端), Lorraine Potocki, Lisa Emrick, Jennifer Sheppard, My T.T. Nguyen, Anahita Khoramnia, Paula Patricia Hernandez, Sandesh CS. Nagamani, Zhandong Liu, Undiagnosed Diseases Network, Christine M. Eng, Brendan Lee, and Pengfei Liu**

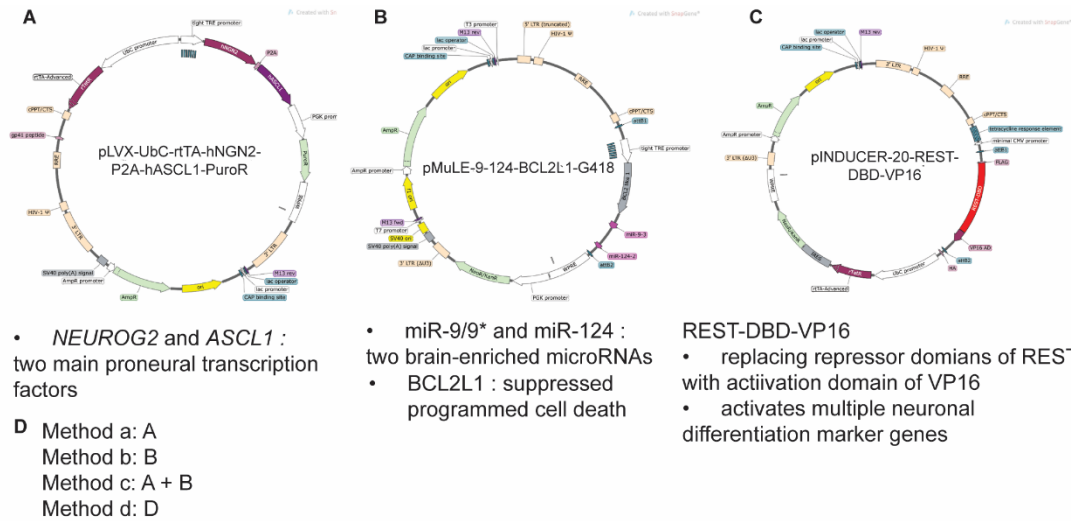

**Figure S1. Four transdifferentiation methods used in this study. (A-C)** Lentivirus vectors used in four transdifferentiation methods, including: **(A)** vector overexpressing the pro-neuronal transcription factors *NEUROG2* and *ASCL1*, **(B)** vector co-expressing the microRNA *miR-9/9\**, *miR-124*, and the anti-apoptotic gene *BCL2L1*, and **(C)** vector DBD-REST-VP16, involving the replacement of *REST/NRSF* repressor domains with the activation domain of the viral activator VP16. **(D)** Four methods used for transdifferentiation.

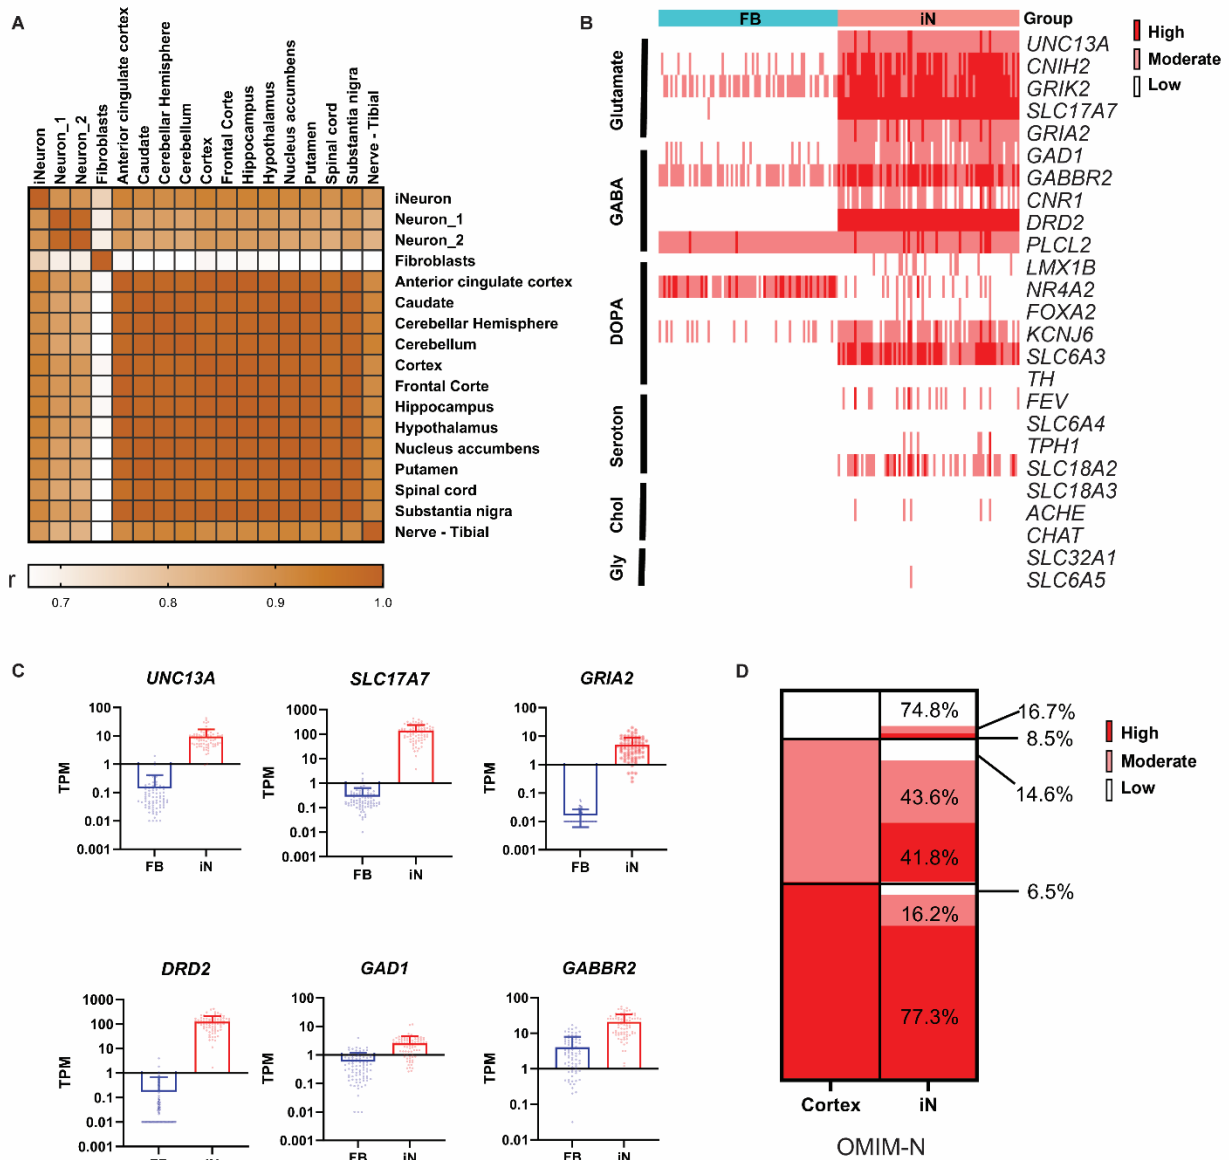

**Figure S2. Transcriptomic characterizations of iNeurons.** **(A)** Correlation heatmap comparing iNeurons with two iterations of iPSCs-derived neurons and a spectrum of neural tissues. Neuron\_1 represents neurons differentiated from iPSCs, while Neuron\_2 refers to neurons derived via overexpression of the neuronal transcription factor Neurog2 in iPSCs. **(B)** Heatmap showing the expression profiles of neuron subtype-specific genes across fibroblasts (FB) and iNeurons (iN). Genes related to glutamatergic neuron include Unc-13 homolog A (*UNC13A*),

AMPA receptor auxiliary protein 2 (*CNIH2*), GluK2 (*GRIK2*), glutamate ionotropic receptor AMPA type subunit 2 (*GRIA2*) and vGLUT1 (*SLC17A7*); GABAergic neuron markers include glutamate decarboxylase 1 (*GAD1*), gamma-aminobutyric acid type B receptor subunit 2 (*GABBR2*), cannabinoid receptor 1 (*CNRI*), dopamine receptor D2 (*DRD2*), and phospholipase C like 2 (*PLCL2*); dopaminergic neuron markers are represented by LIM homeobox transcription factor 1 beta (*LMX1B*), nuclear receptor subfamily 4 group A member 2 (*NR4A2*), potassium voltage-gated channel subfamily J member 6 (*KCNJ6*), DAT1 (*SLC6A3*) and Tyrosine hydroxylase (*TH*); serotonergic neuron markers encompass ETS transcription factor (*FEV*), serotonin transporter 1 (*SLC6A4*), tryptophan hydroxylase (*TPHI*), and VMAT2 (*SLC18A2*); cholinergic neuron markers comprise vesicular acetylcholine transporter (*SLC18A3*), Acetylcholinesterase (*ACHE*) and choline O-acetyltransferase (*CHAT*); glycinergic neuron-specific genes: VGAT (*SLC32A1*) and GlyT-2 (*SLC6A5*). **(C)** Boxplots delineate the TPM expression levels of selecte neuron subtype-specific genes, namely *UNC13A*, *SLC17A* and *GRIA2* for glutamatergic; *DRD2*, *GAD1* and *GABBR2* for GABAergic. The data is presented as mean  $\pm$  SD. **(D)** Comparative expression analysis of OMIM-N genes in the brain cortex (GTEx) and iNeurons, highlighting over 70% overlap for high- and low- expression genes. For moderate-expression genes, 43.6% are concordant and 41.8% are expressed higher in iNeurons. FB: fibroblasts, n=77; iN: iNeurons, n=91.

Intellectual disability

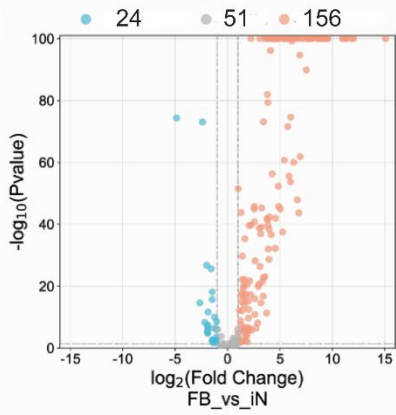

Brain malformation

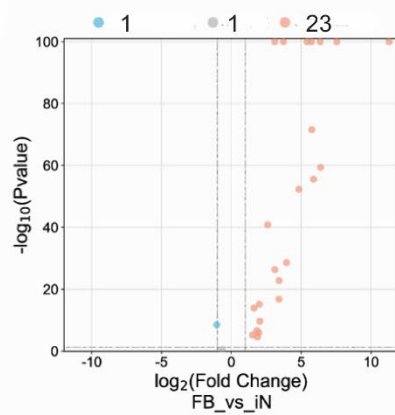

ASD

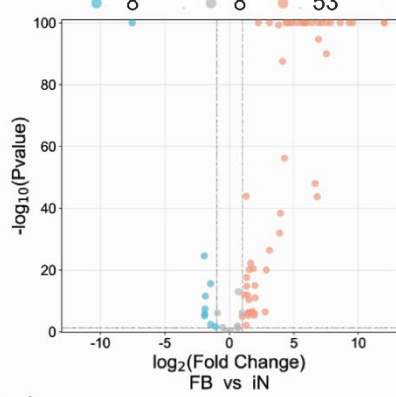

Epilepsy

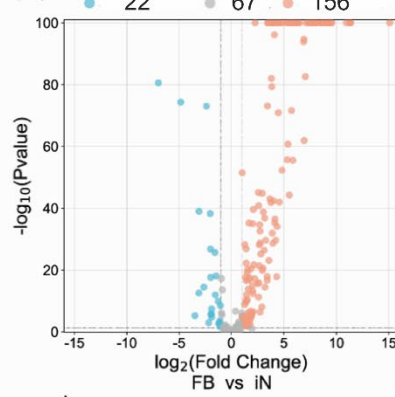

Ataxia

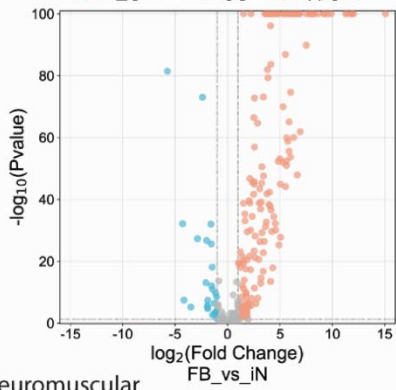

Neuropathy

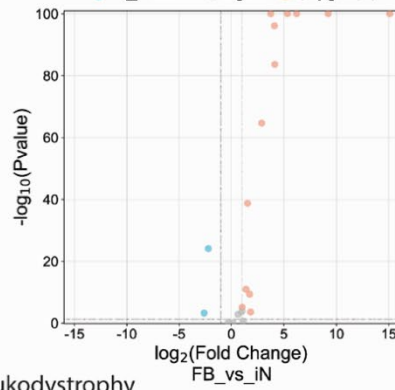

Neuromuscular

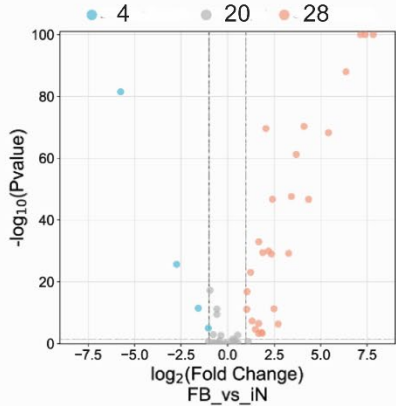

Leukodystrophy

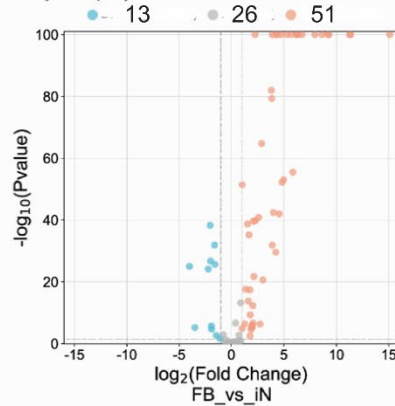

**Figure S3. Activation of low-expression genes in eight panels of genes that cause various neurological phenotypes.** The panels include intellectual disability, brain malformation (BM), autism spectrum disorder (ASD), epilepsy, ataxia, neuropathy, neuromuscular disorder, and leukodystrophy.

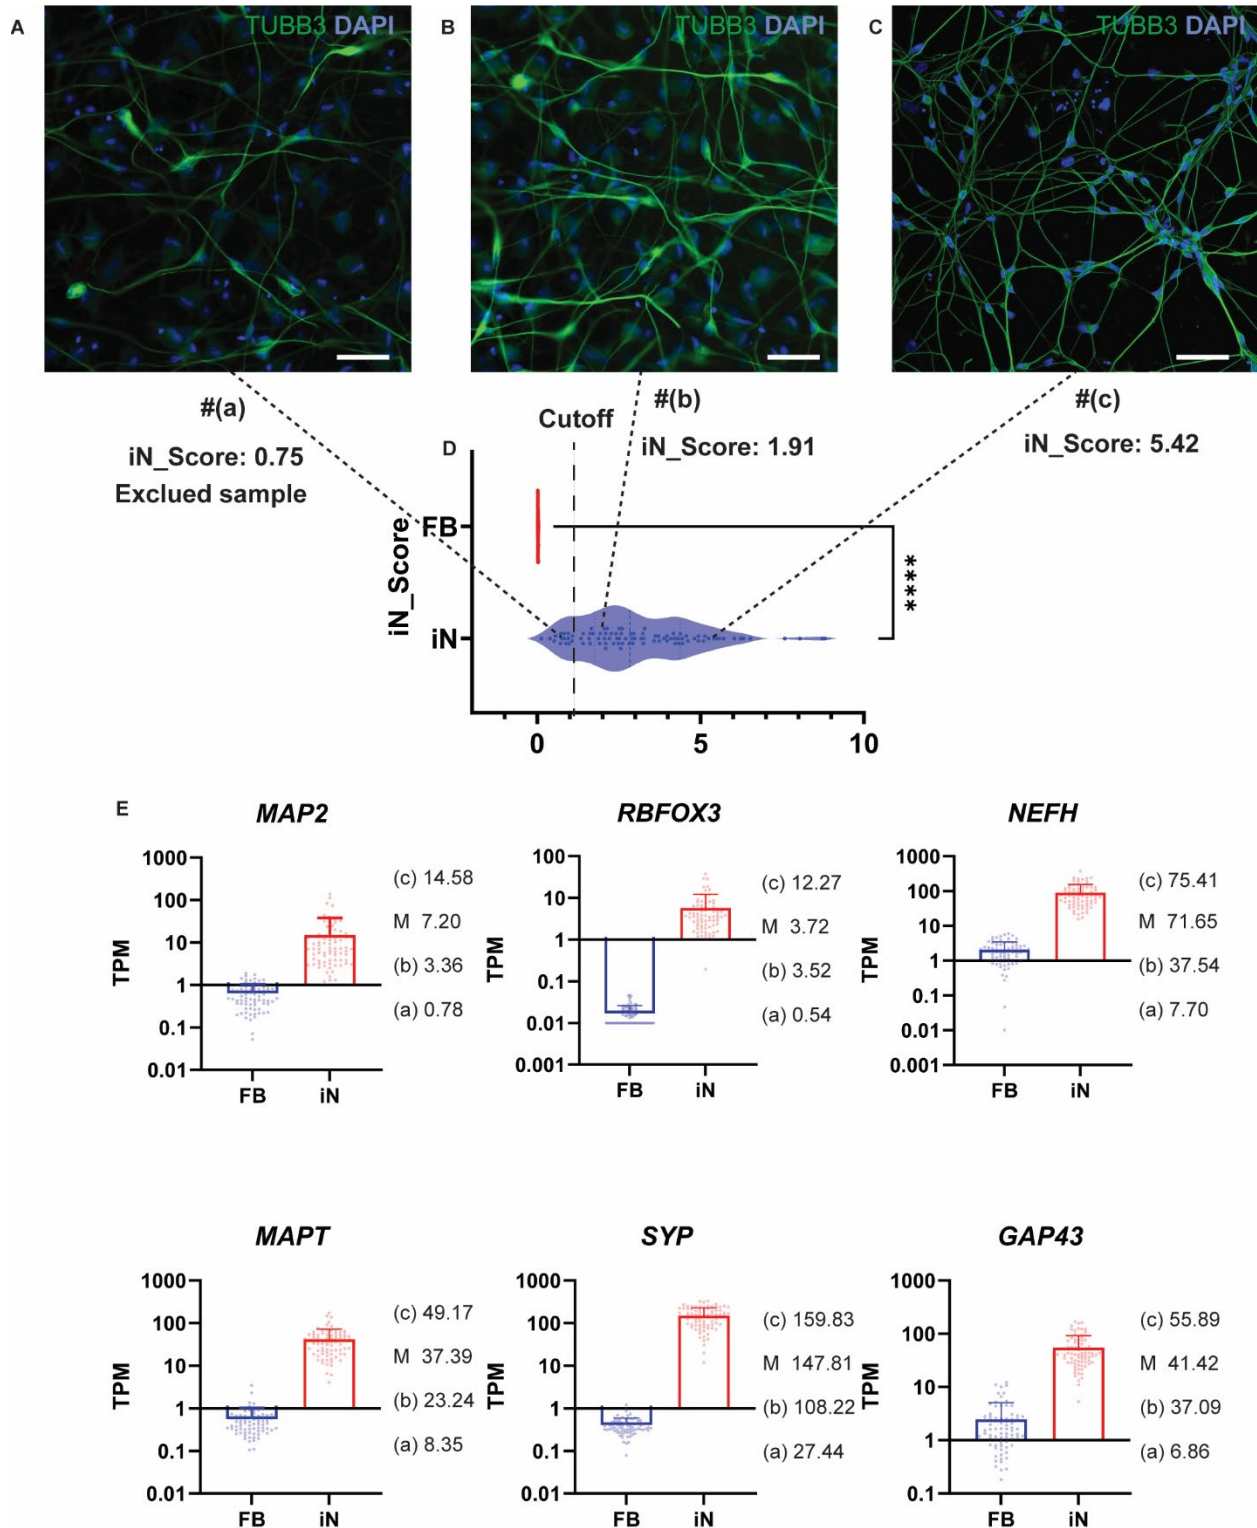

**Figure S4. iN\_Score and transdifferentiation efficiency in three representative iNeuron samples. (A-C)** Immunostaining of Tubulin  $\beta$ -III (TUBB3) in iNeuron samples from individual

#(a), #(b), and #(c). **(D)** iN-Score of iNeuron samples from individual #(a), #(b), and #(c). **(E)** The expression levels of mature neuron genes microtubule associated protein 2 (*MAP2*), NeuN (*RBF3*), neurofilament heavy chain (*NEFH*), Tau (*MAPT*), Synaptophysin (*SYP*) and growth associated protein 43 (*GAP43*) in fibroblasts (n=77) and iNeurons (n=82). The gene expression in individual #(a), #(b), #(c) is listed on the right. M indicates the average expression of all iNeuron samples. The data is presented as mean  $\pm$  SD.



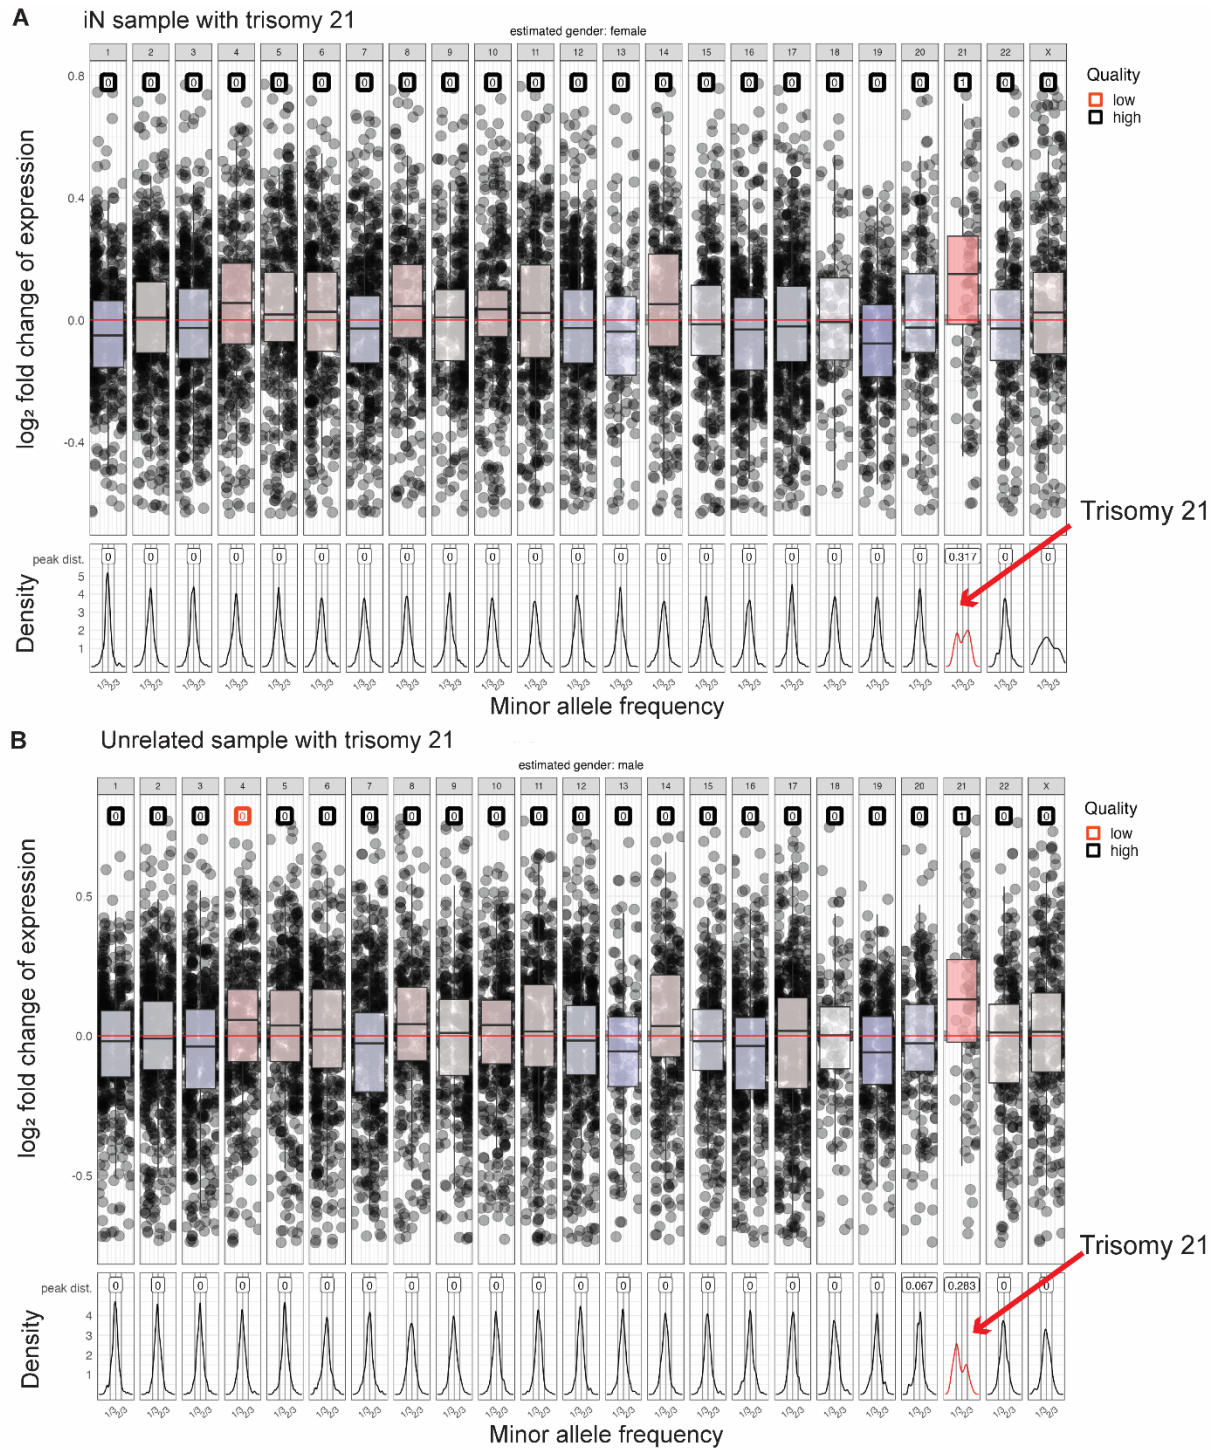

**Figure S5. Detection of chromosomal aneuploidies using RNA-seq-based computational analysis.** Among all the iNeuron samples included in this study, RNA-seq-based CNV analysis identified only one abnormality. This is illustrated as a gain of chromosome 21 in (A).

Diagnostic interpretation was performed with caution in this sample, and no molecular diagnosis was revealed. It is unclear whether the abnormality of chromosome 21 arose during or prior to the transdifferentiation. **(B)** denotes CNV plots from a positive control sample from an individual outside of this study with clinically confirmed trisomy 21. The experimental and bioinformatic RNA-seq analysis follow the same procedures as those described in this study.

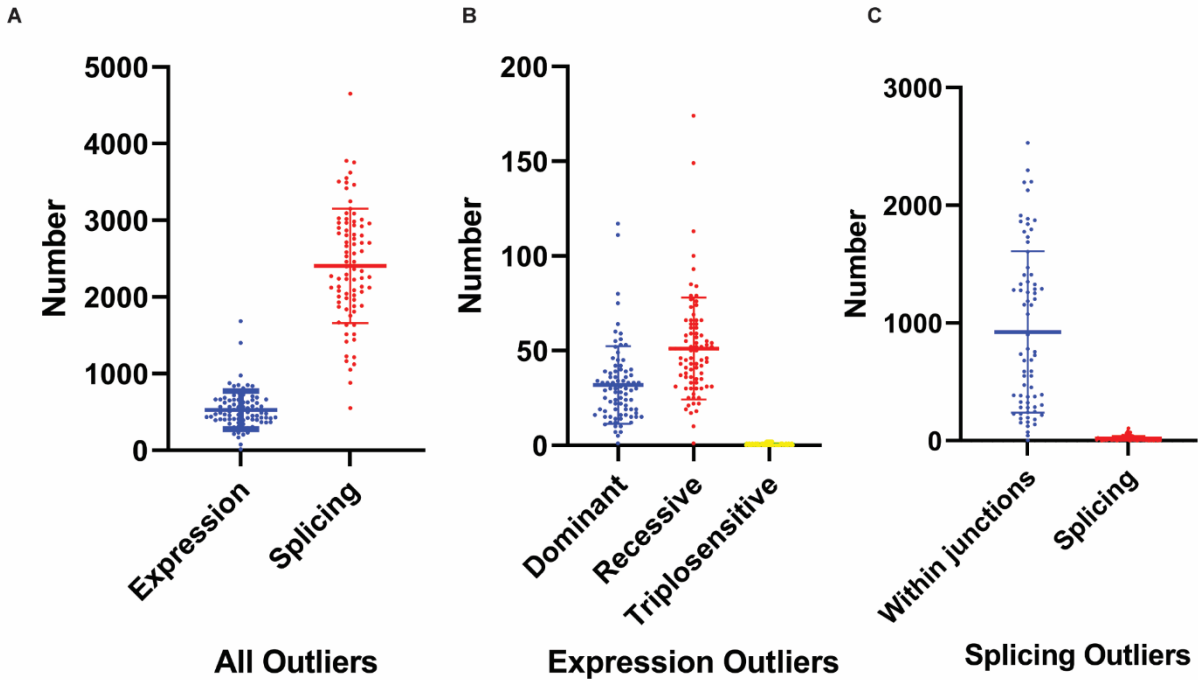

**Figure S6. Expression and splicing outliers through filtration at each step. (A)** Number of potential outliers identified in the initial step using our analytical workflow. **(B)** Number of expression outliers remaining after restricting to known disease-associated genes in ClinGen and OMIM. **(C)** Number of splicing outliers remaining after filtering DNA variant pairs and SpliceAI prediction. Data is presented as mean  $\pm$  SD. Each dot represents an individual.

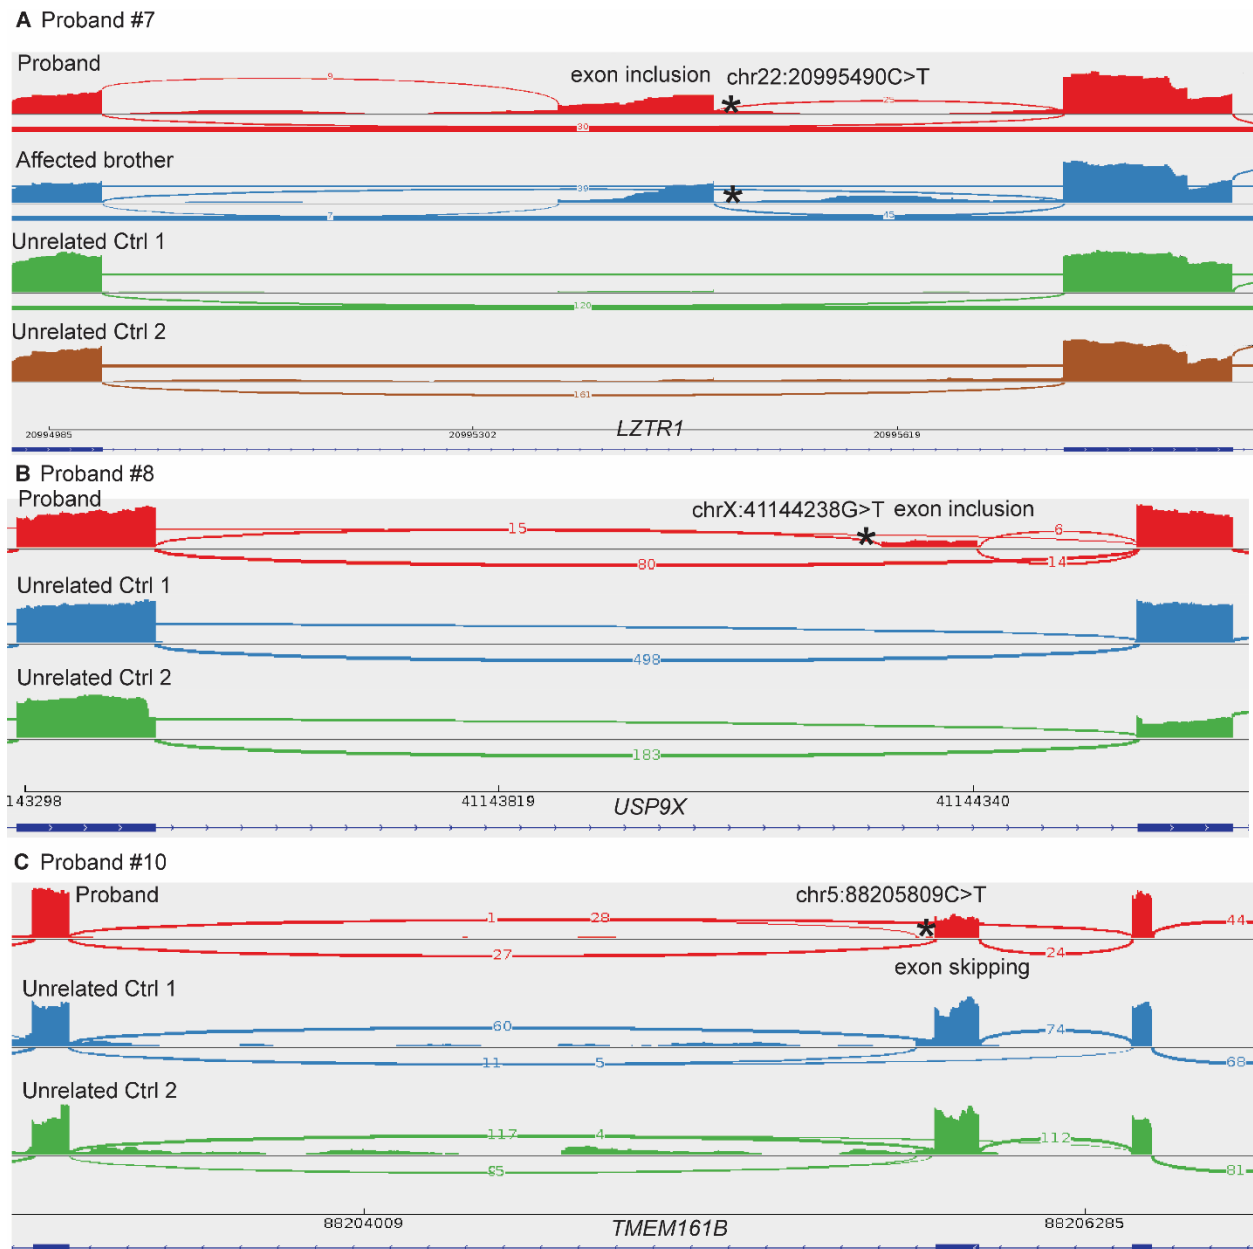

**Figure S7. Detection and characterization of aberrant splicing events in *LZTR1* (Proband #7), *USP9X* (Proband #8), and *TMEM161B* (Proband #10).** (A) The presence of an intronic variant in *LZTR1* (NM\_006767.4: c.1943-256C>T) leads to 117nt and 99nt cryptic exon inclusion (r.1942\_1943ins[1942+342\_1943-262/1942+360\_1943-262]) in both the proband and his affected brother. (B) A *de novo* variant in *USP9X* (NM\_001039591.3: c.1315-284G>T) causes 106nt and 110nt cryptic exon inclusion (r.1314\_1315ins[1315-281\_1315-176/1315-

281\_1315-172]). The variant also results in aberrant expression (fold change 0.36). (C) A variant in *TMEM161B* (NM\_153354.5: c.800+5G>A) leads to skipping of exon 8 (141nt) (r.660\_800del). Variants are indicated by asterisk.

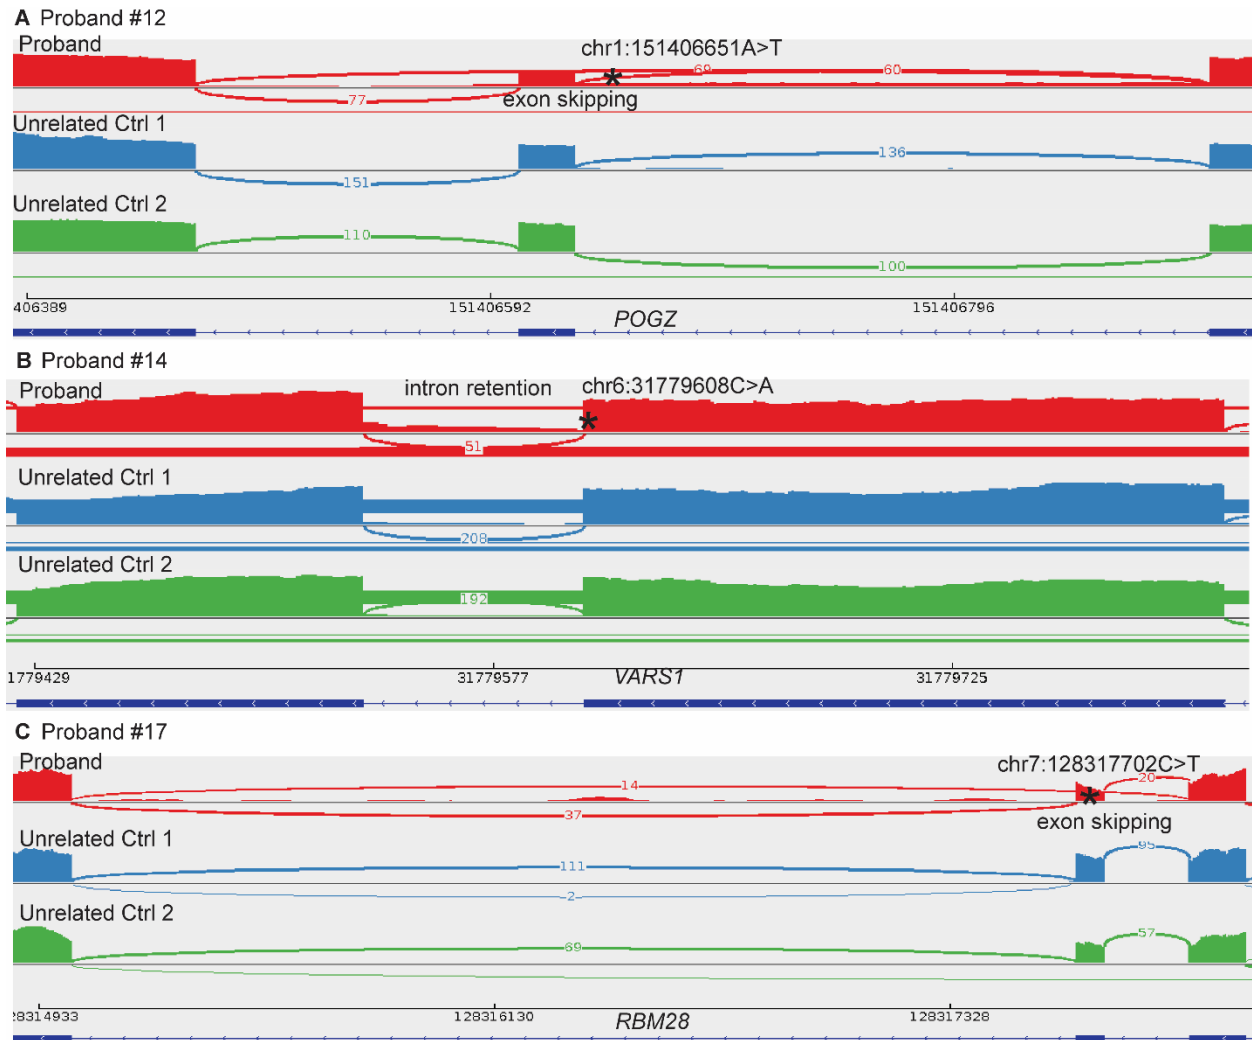

**Figure S8. Identification and characterization of aberrant splicing events in *POGZ***

**(Proband #12), *VARS1* (Proband #14), and *RBM28* (Proband #17).** (A) A *de novo* variant in *POGZ* (NM\_015100.4: c.2546-20T>A) causes skipping of exon 18 (25nt) and retention of introns 17-18 (446nt) (r.2546\_2570del/2545\_2571ins[2545+1\_2546-21,a,2546-19\_2571-1]). (B) A variant in *VARS1* (NM\_006295.3: c.3288G>T) leads to entire intron 27 (71nt) retention (r.3288delins[u,3288+1\_3289-1]). (C) A variant in *RBM28* (NM\_018077.3: c.1745G>A) results in skipping of exon 16 (75nt, r.1714\_1788del). Variants are indicated by asterisk.

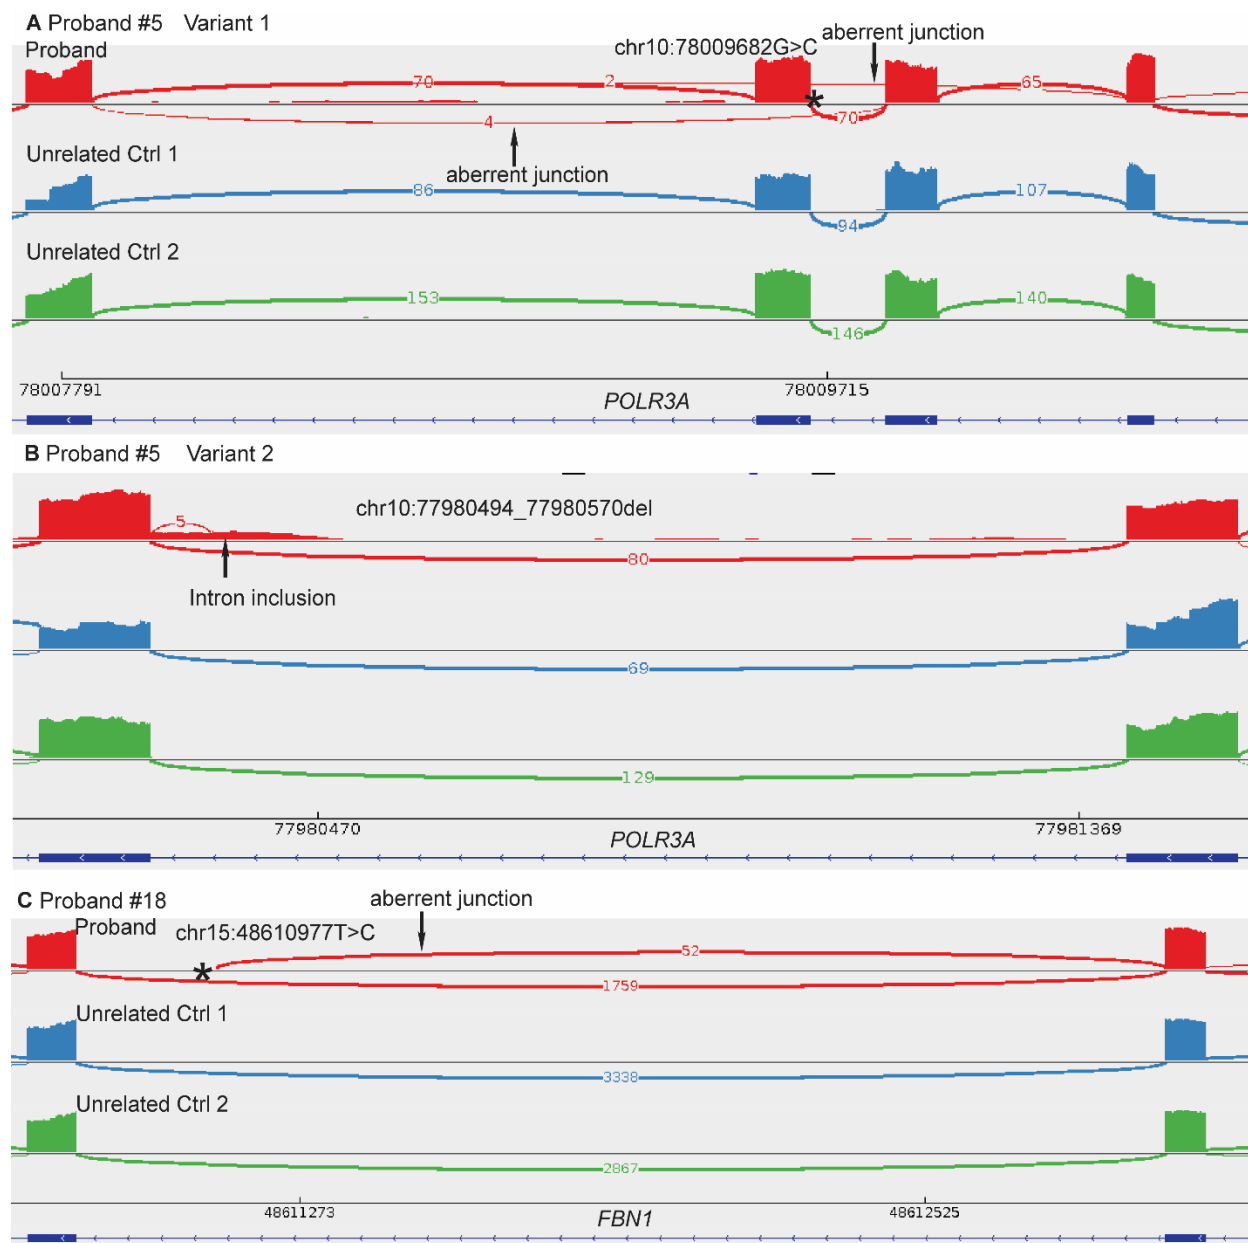

**Figure S9. Detection and characterization of splicing events in two probands, #5 and #18.**

These events were identified manually and not flagged by the DROP pipeline, likely due to the limited presence of aberrant junctions caused by nonsense-mediated decay (NMD). **(A)** The presence of an intronic variant in *POLR3A* (NM\_007055.4: c.1771-7C>G) results in skipping of exon 14 (139nt) and exons13-14 (267nt) (r.1771\_1909del/1643\_1909del). **(B)** Another 76nt intronic deletion in *POLR3A* (NM\_007055.4: c.3892-297\_3892-221del) causes 227nt intron

inclusion at splice acceptor and 154nt cryptic exon inclusion from intron 29

(r.3891\_3892ins[3892-1\_3892-227/3892-74\_3892-227]). (C) An intronic variant in *FBNI*

(NM\_000138.5: c.248-151A>G) leads to inclusion of cryptic exon (131nt) with premature stop codon likely causing NMD (r.247\_248ins[248-282\_248-152]). Variants are indicated by asterisk or black box (deletion).



A Proband #6 Variant 1

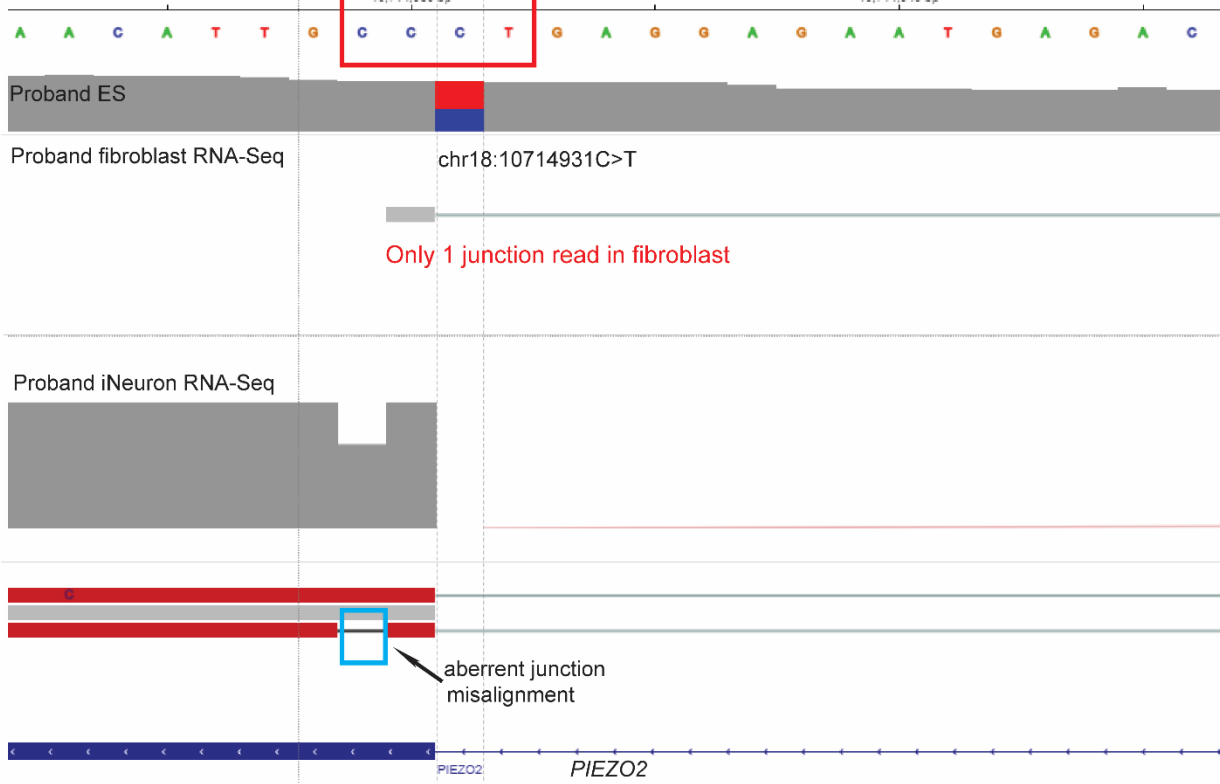

B Proband #6 Variant 2

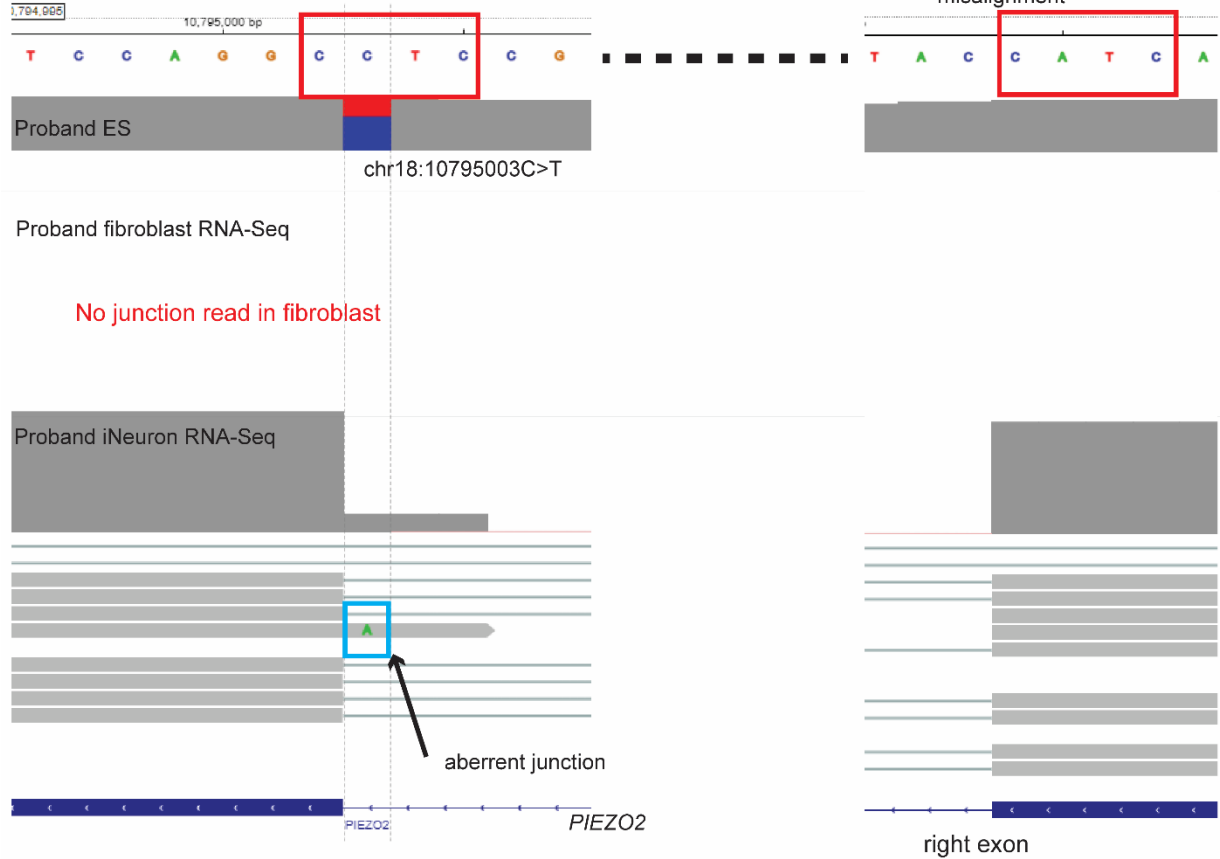

**Figure S10. Aberrant splicing events caused by misalignment and NMD in Proband #6.**

This proband has compound heterozygous variants in *PIEZO2* (NM\_022068.4: c.5257-1G>A and c.1528-1G>A). The first DNA variant C>T (c.5257-1G>A) functions equivalent to moving the splice site to the left by 1nt (r.5258del), resulting in delC. But because there are 3 Cs, STAR treated the junction shift as an indel (**A**). The second DNA variant (c.1528-1G>A) results in a CATC sequence, which is misaligned from the right exon to the left. This variant also results in shifting of the splice site by 1nt (r.1528del) (**B**). Limited junction reads are observed in fibroblast RNA-Seq data.

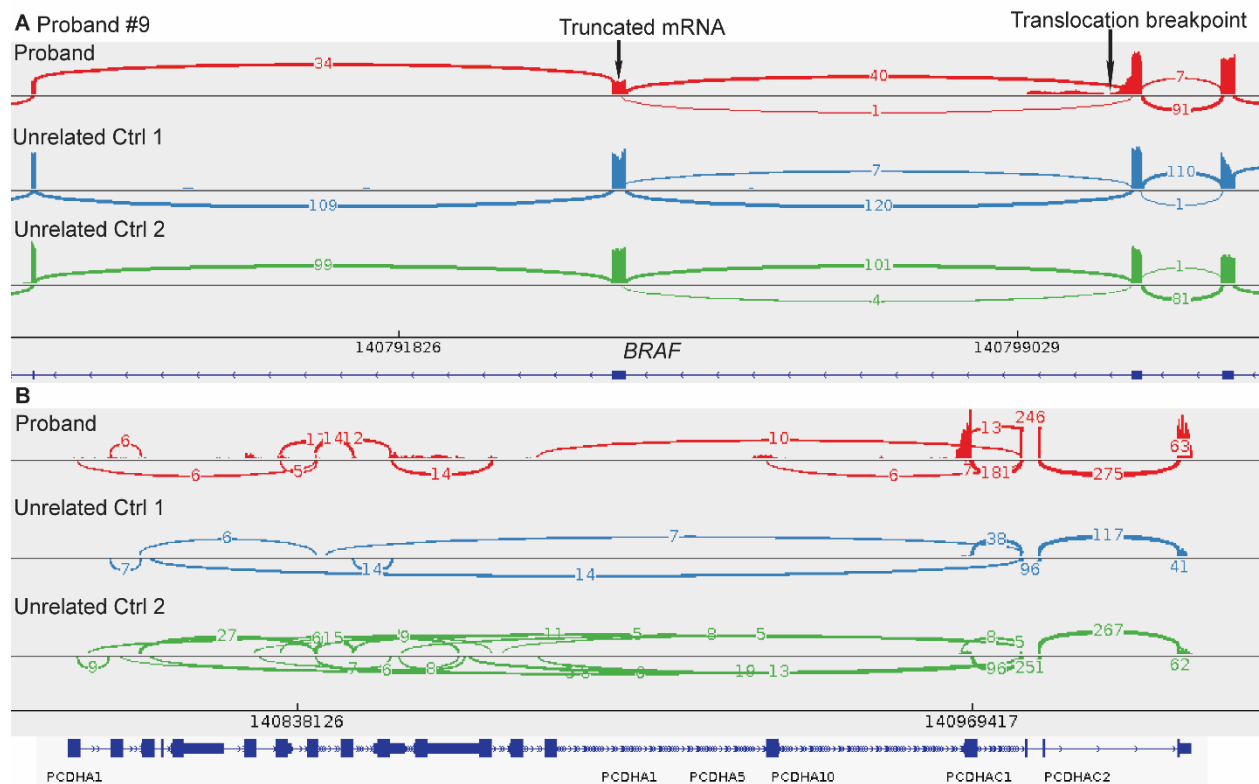

**Figure S11. Translocation of  $t(5;7)(q31.3;q34)$  in Proband #9. (A)  $t(5;7)(q31.3;q34)$  translocation leads to fusion gene of 5' *BRAF* with sequence from 7q34 with uncertain breakpoints; and fusion gene of 5' *BRAF* plus 1225nt intron retention with uncertain sequence from 7q34. (B) The translocation also causes the disruption of the protocadherin-alpha gene cluster.**

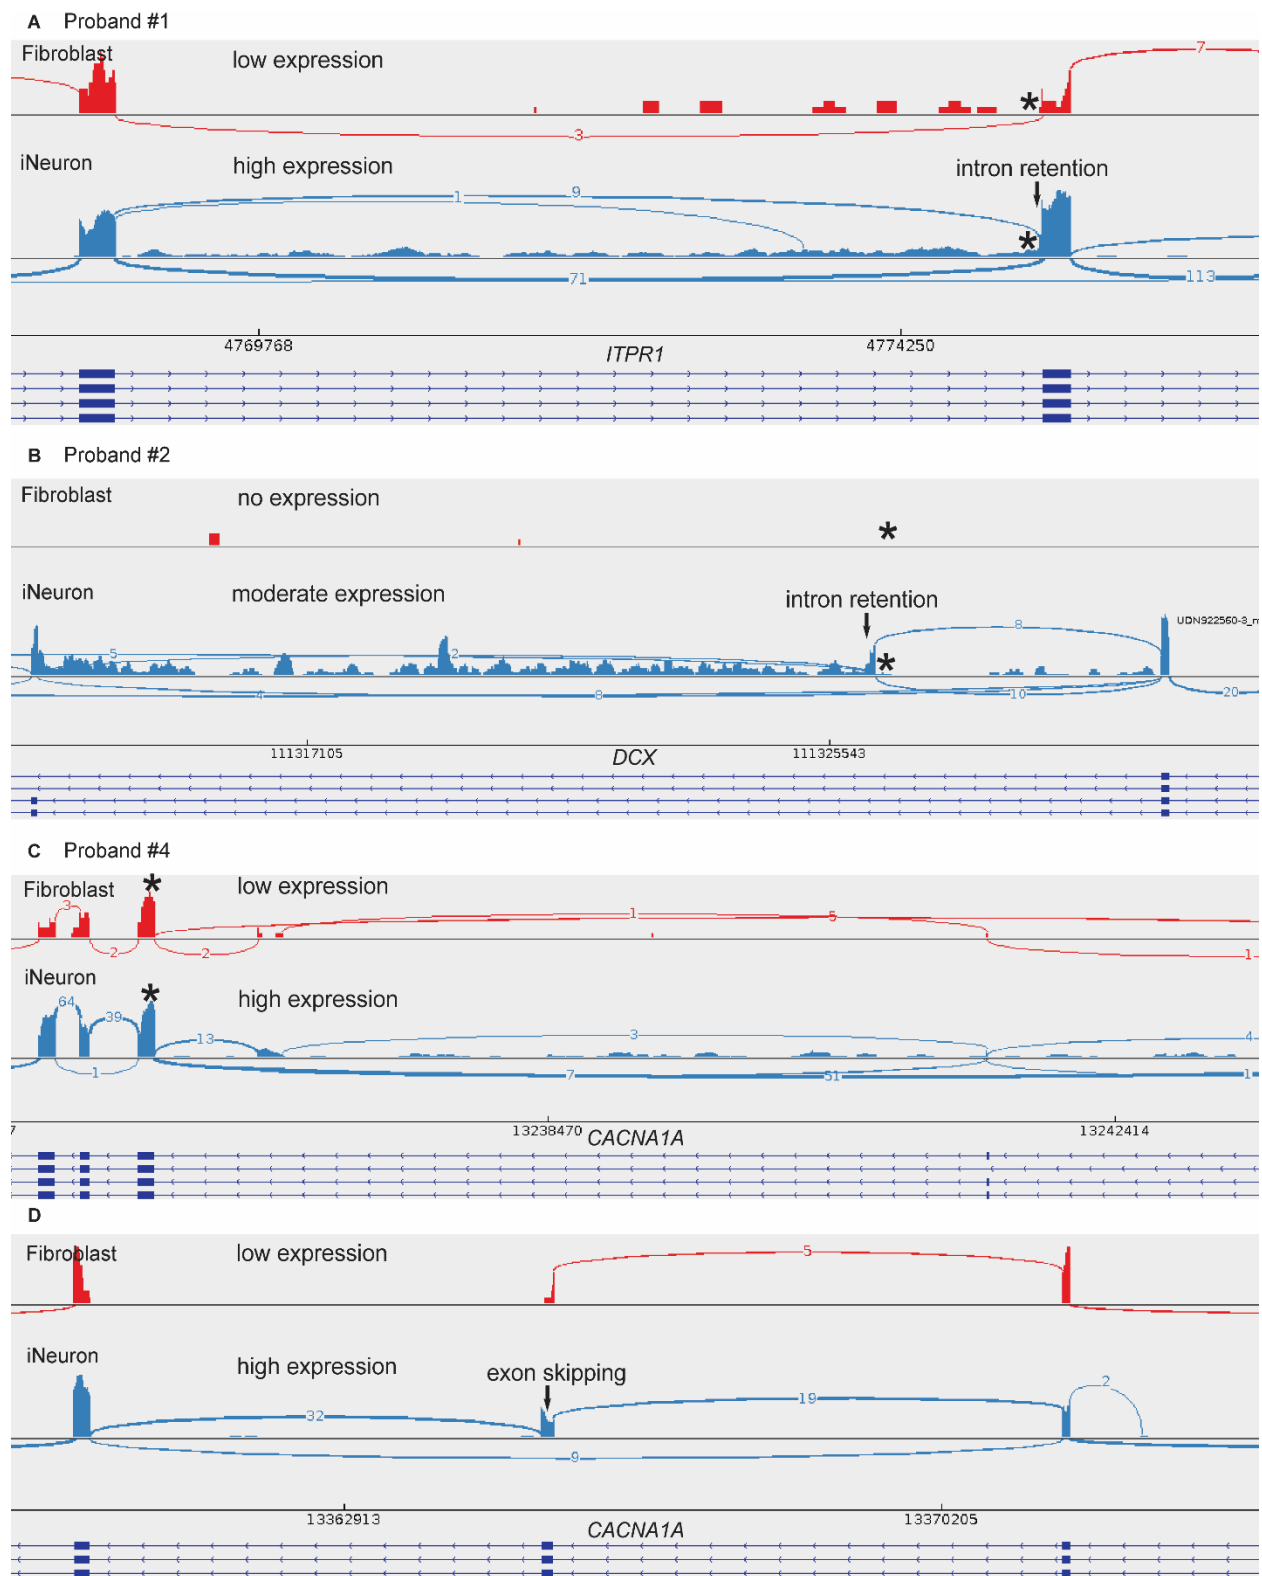

**Figure S12. Detection of aberrant events in iNeuron RNA-Seq data from patient #1, #2, and #4. (A)** 15-nucleotide retention from intron 45 and complete intron 45 retention are uniquely

observed in iNeuron due to the low expression of *ITPR1* in fibroblast. **(B)** Inclusion of a 13,549 bp cryptic exon from intron is exclusively observed in iNeuron as *DCX* is not expressed in fibroblast. **(C)** Skewed expression of the variant allele and exon skipping are only detected in iNeuron owing to the limited expression of *CACNA1A* in fibroblast.

Proband #2

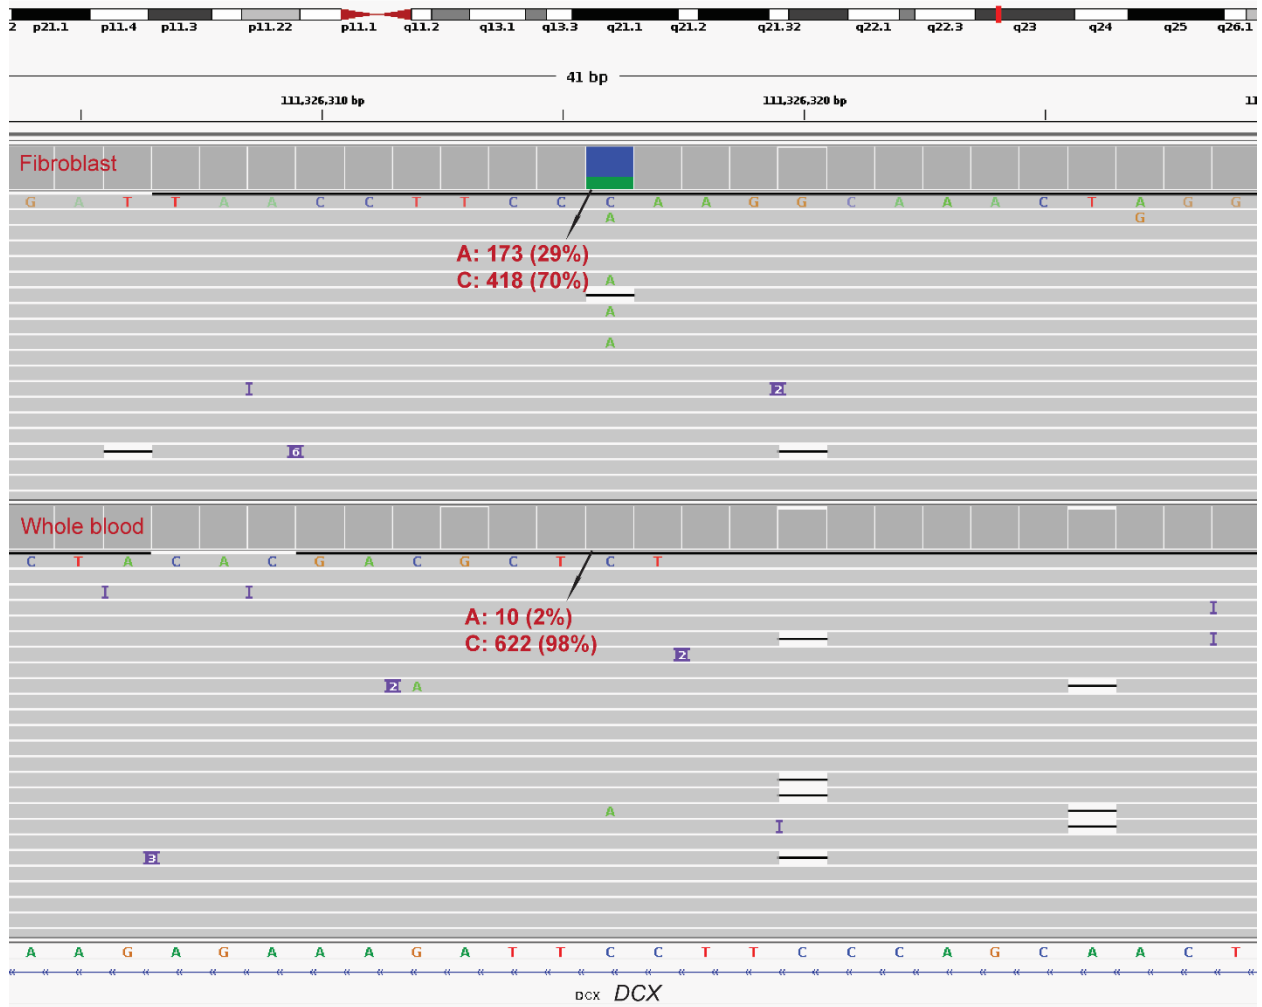

**Figure S13. Amplicon-based next-generation sequencing on the fibroblast and whole blood from the mother of Proband #2. result revealed a variant fraction of 29% in fibroblast and 2% in whole blood.**

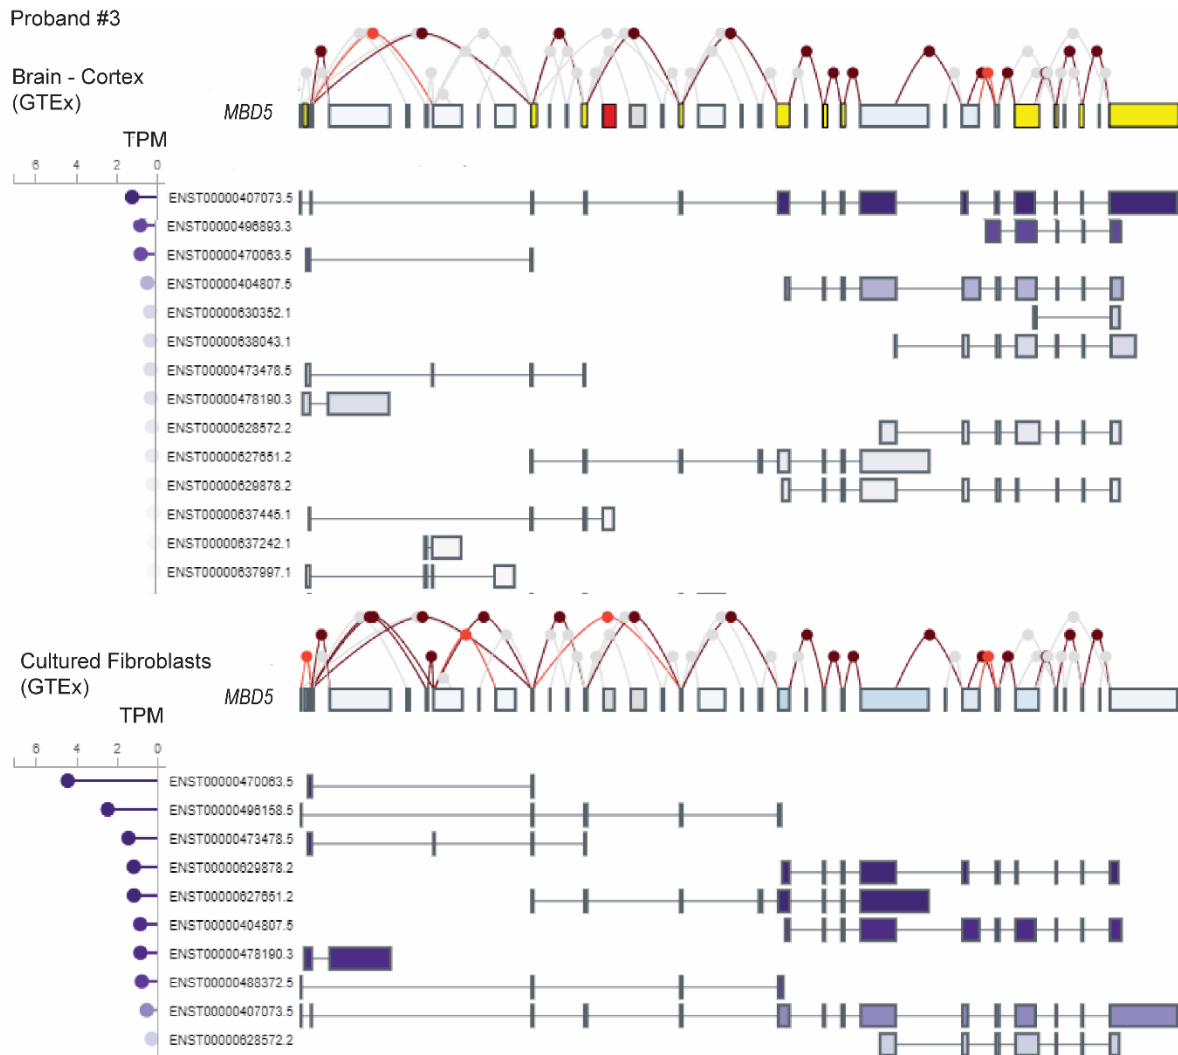

**Figure S14. Identification of 12 neuron-enriched exons in *MBD5* genes.** Although iNeurons and fibroblasts have similar *MBD5* expression, these exons exhibit higher expression in iNeurons and brain cortex (GTEx consortium) when compared to cultured fibroblasts. Neuron-specific exons are represented by red, while neuron-enriched exons are denoted by yellow.

Table S1. Low-expressed genes associated with neurological disorders in CATs

| Panels (Gene Number)              | Proportion of Genes with TPM $\leq$ 1 (%) |              |              |               |
|-----------------------------------|-------------------------------------------|--------------|--------------|---------------|
|                                   | FB<br>(N=77)                              | FB<br>(GTEx) | WB<br>(GTEx) | Muscle (GTEx) |
| Neurological OMIM (2721)          | 20.7                                      | 19.8         | 34.9         | 24.3          |
| Intellectual Disability (1379)    | 16.8                                      | 15.3         | 32.7         | 21.4          |
| Brain Malformation (163)          | 14.7                                      | 14.1         | 36.8         | 22.1          |
| Autism Spectrum Disorder<br>(301) | 22.9                                      | 21.7         | 36.0         | 23.7          |
| Epilepsy (1150)                   | 21.4                                      | 19.6         | 32.6         | 23.6          |
| Ataxia (1282)                     | 22.8                                      | 21.4         | 36.8         | 26.1          |
| Neuropathy (105)                  | 20.0                                      | 14.7         | 32.4         | 21.6          |
| Neuromuscular Disorder<br>(226)   | 23.1                                      | 18.8         | 32.1         | 7.1           |
| Leukodystrophy (709)              | 12.7                                      | 10.4         | 25.5         | 13.9          |



Table S2. Activation of low-expressed genes associated with neurological disorders using four transdifferentiation (21 days' induction) methods

| Panels                  | Proportion of Genes (%) |       |      |      |
|-------------------------|-------------------------|-------|------|------|
|                         | a                       | b     | c    | d    |
| Neuronal Markers        | 89.2                    | 48.2  | 63.3 | 81.9 |
| Neurological OMIM       | 29.6                    | 19.3  | 19.6 | 24.8 |
| Intellectual Disability | 39.6                    | 26.0  | 27.2 | 38.5 |
| Brain Malformation      | 52.2                    | 27.9  | 32.4 | 52.1 |
| Autism Spectrum         |                         |       |      |      |
| Disorder                | 38.8                    | 31.5  | 25.9 | 41.5 |
| Epilepsy                | 37.0                    | 201.1 | 23.0 | 33.1 |
| Ataxia                  | 29.8                    | 20.9  | 18.7 | 27.9 |
| Neuropathy              | 43.4                    | 33.5  | 33.4 | 38.4 |
| Neuromuscular           |                         |       |      |      |
| Disorders               | 17.8                    | 21.7  | 9.8  | 15.9 |
| Leukodystrophy          | 36.6                    | 21.4  | 29.7 | 33.2 |

a) overexpression of the pro-neuronal transcription factors *NEUROG2* and *ASCL1*; b) co-expression of the microRNA *miR-9/9\**, *miR-124*, and the anti-apoptotic gene *BCL2L1*; c) a and b; d) overexpression of DBD-REST-VP16, involving the replacement of *REST/NRSF* repressor domains with the activation domain of the viral activator VP16.

Table S3. Activation of low-expressed genes associated with neurological disorders at different induction time point

| Panels                   | Proportion of Genes (%) |       |       |
|--------------------------|-------------------------|-------|-------|
|                          | a-D14                   | a-D21 | a-D28 |
| Neuronal Markers         | 70.5                    | 89.2  | 89.2  |
| Neurological OMIM        | 22.2                    | 29.6  | 28.7  |
| Intellectual Disability  | 30.1                    | 39.6  | 39.1  |
| Brain Malformation       | 44.3                    | 52.2  | 48.5  |
| Autism Spectrum Disorder | 33.0                    | 38.8  | 40.1  |
| Epilepsy                 | 27.9                    | 37.0  | 36.8  |
| Ataxia                   | 23.0                    | 29.8  | 29.3  |
| Neuropathy               | 38.4                    | 43.4  | 47.5  |
| Neuromuscular Disorders  | 13.8                    | 17.8  | 15.9  |
| Leukodystrophy           | 29.2                    | 36.6  | 34.4  |

a) overexpression of the pro-neuronal transcription factors *NEUROG2* and *ASCL1*. D14: 14 days after induction; D21: 21 days after induction; D28: 28 days after induction.

Table S4. Activated and actionable genes associated with neurological disorders in iNeurons compared to whole blood

| Category                       | N of low-expression genes in whole blood | Activated and Actionable in iN |      |
|--------------------------------|------------------------------------------|--------------------------------|------|
|                                |                                          | N                              | %    |
| Neurological OMIM              | 909                                      | 520                            | 57.2 |
| Intellectual Disability Panel  | 449                                      | 293                            | 65.2 |
| Brain Malformation Panel       | 60                                       | 44                             | 73.3 |
| Autism Spectrum Disorder Panel | 108                                      | 67                             | 62.3 |
| Epilepsy Panel                 | 373                                      | 215                            | 57.6 |
| Ataxia Panel                   | 470                                      | 268                            | 57.0 |
| Neuropathy Panel               | 33                                       | 19                             | 57.6 |
| Neuromuscular Disorders Panel  | 72                                       | 35                             | 48.6 |
| Leukodystrophy Panel           | 178                                      | 135                            | 75.8 |

Table S5. Successful transdifferentiation replication in 3 samples (out of 4) with low *ASCL-NEUROG2* expression.

| Sample | Repeat | iN_Score | <i>ASCL1</i> | <i>NEUROG2</i> |
|--------|--------|----------|--------------|----------------|
| #1     | R1     | Failed   | 3.86         | 3.28           |
|        | R2     | Failed   | 366.17       | 456.43         |
| #2     | R1     | Failed   | 53.94        | 50.06          |
|        | R2     | Passed   | 639.59       | 855.04         |
| #3     | R1     | Failed   | 79.95        | 76.30          |
|        | R2     | Passed   | 175.92       | 216.40         |
| #4     | R1     | Failed   | 94.62        | 95.29          |
|        | R2     | Passed   | 781.93       | 999.31         |

Supplemental Data Files 1. Gene Ontology (GO) terms and pathways identified in iNeurons through functional enrichment analysis.

Supplemental Data Files 2. Human Phenotype Ontology (HPO) description for individuals with a molecular diagnosis.

Supplemental Data Files 3. Expression of neuron-enriched/specific exons from OMIM-N genes.

## **Members of the Undiagnosed Diseases Network**

Maria T. Acosta

David R. Adams

Raquel L. Alvarez

Justin Alvey

Aimee Allworth

Ashley Andrews

Euan A. Ashley

Ben Afzali

Carlos A. Bacino

Guney Bademci

Ashok Balasubramanyam

Dustin Baldrige

Jim Bale

Michael Bamshad

Deborah Barbouth

Pinar Bayrak-Toydemir

Anita Beck

Alan H. Beggs

Edward Behrens

Gill Bejerano

Hugo J. Bellen

Jimmy Bennett

Jonathan A. Bernstein

Gerard T. Berry

Anna Bican

Stephanie Bivona

Elizabeth Blue  
John Bohnsack  
Devon Bonner  
Lorenzo Botto  
Lauren C. Briere  
Gabrielle Brown  
Elizabeth A. Burke  
Lindsay C. Burrage  
Manish J. Butte  
Peter Byers  
William E. Byrd  
John Carey  
Olveen Carrasquillo  
Thomas Cassini  
Ta Chen Peter Chang  
Sirisak Chanprasert  
Hsiao-Tuan Chao  
Ivan Chinn  
Gary D. Clark  
Terra R. Coakley  
Laurel A. Cobban  
Joy D. Cogan  
Matthew Coggins  
F. Sessions Cole  
Heather A. Colley  
Heidi Cope  
Rosario Corona  
William J. Craigen

Andrew B. Crouse  
Michael Cunningham  
Precilla D'Souza  
Hongzheng Dai  
Surendra Dasari  
Joie Davis  
Jyoti G. Dayal  
Margaret Delgado  
Esteban C. Dell'Angelica  
Katrina Dipple  
Daniel Doherty  
Naghmeh Dorrani  
Argenia L. Doss  
Emilie D. Douine  
Dawn Earl  
David J. Eckstein  
Lisa T. Emrick  
Christine M. Eng  
Marni Falk  
Elizabeth L. Fieg  
Paul G. Fisher  
Brent L. Fogel  
Irman Forghani  
Jiayu Fu  
William A. Gahl  
Ian Glass  
Page C. Goddard  
Rena A. Godfrey



Alana Grajewski  
Andrea Gropman  
Meghan C. Halley  
Rizwan Hamid  
Neal Hanchard  
Kelly Hassey  
Nichole Hayes  
Frances High  
Anne Hing  
Fuki M. Hisama  
Ingrid A. Holm  
Jason Hom  
Martha Horike-Pyne  
Alden Huang  
Yan Huang  
Sarah Hutchison  
Wendy Introne  
Rosario Isasi  
Kosuke Izumi  
Gail P. Jarvik  
Jeffrey Jarvik  
Suman Jayadev  
Orpa Jean-Marie  
Vaidehi Jobanputra  
Emerald Kaitryn  
Shamika Ketkar  
Dana Kiley  
Gonench Kilich

Shilpa N. Kobren

Isaac S. Kohane

Jennefer N. Kohler

Susan Korrick

Deborah Krakow

Donna M. Krasnewich

Elijah Kravets

Seema R. Lalani

Byron Lam

Christina Lam

Brendan C. Lanpher

Ian R. Lanza

Kimberly LeBlanc

Brendan H. Lee

Roy Levitt

Richard A. Lewis

Pengfei Liu

Xue Zhong Liu

Nicola Longo

Sandra K. Loo

Joseph Loscalzo

Richard L. Maas

Ellen F. Macnamara

Calum A. MacRae

Valerie V. Maduro

AudreyStephannie Maghiro

Rachel Mahoney

May Christine V. Malicdan

Laura A. Mamounas

Teri A. Manolio

Rong Mao

Ronit Marom

Gabor Marth

Beth A. Martin

Martin G. Martin

Julian A. Martínez-Agosto

Shruti Marwaha

Jacob McCauley

Allyn McConkie-Rosell

Alexa T. McCray

Elisabeth McGee

Matthew Might

Danny Miller

Ghayda Mirzaa

Eva Morava

Paolo Moretti

Marie Morimoto

John J. Mulvihill

Mariko Nakano-Okuno

Stanley F. Nelson

Shirley Nieves-Rodriguez

Donna Novacic

Devin Oglesbee

James P. Orengo

Laura Pace

Stephen Pak

J. Carl Pallais

Jeanette C. Papp

Neil H. Parker

Leoyklang Petcharet

John A. Phillips III

Jennifer E. Posey

Lorraine Potocki

Barbara N. Pusey Swerdzewski

Aaron Quinlan

Deepak A. Rao

Anna Raper

Wendy Raskind

Genecee Renteria

Chloe M. Reuter

Lynette Rives

Amy K. Robertson

Lance H. Rodan

Jill A. Rosenfeld

Elizabeth Rosenthal

Francis Rossignol

Maura Ruzhnikov

Marla Sabaii

Ralph Sacco

Jacinda B. Sampson

Mario Saporta

Judy Schaechter

Timothy Schedl

Kelly Schoch

Daryl A. Scott  
Elaine Seto  
Prashant Sharma  
Vandana Shashi  
Emily Shelkowitz  
Sam Sheppard  
Jimann Shin  
Edwin K. Silverman  
Janet S. Sinsheimer  
Kathy Sisco  
Edward C. Smith  
Kevin S. Smith  
Lilianna Solnica-Krezel  
Ben Solomon  
Rebecca C. Spillmann  
Andrew Stergachis  
Joan M. Stoler  
Kathleen Sullivan  
Jennifer A. Sullivan  
Shirley Sutton  
David A. Sweetser  
Virginia Sybert  
Holly K. Tabor  
Queenie K.-G. Tan  
Amelia L. M. Tan  
Arjun Tarakad  
Mustafa Tekin  
Fred Telischi

Willa Thorson  
Cynthia J. Tifft  
Camilo Toro  
Alyssa A. Tran  
Rachel A. Ungar  
Tiina K. Urv  
Adeline Vanderver  
Matt Velinder  
Dave Viskochil  
Tiphonie P. Vogel  
Colleen E. Wahl  
Melissa Walker  
Nicole M. Walley  
Jennifer Wambach  
Jijun Wan  
Lee-kai Wang  
Michael F. Wangler  
Patricia A. Ward  
Daniel Wegner  
Monika Weisz Hubshman  
Mark Wener  
Tara Wenger  
Monte Westerfield  
Matthew T. Wheeler  
Jordan Whitlock  
Lynne A. Wolfe  
Kim Worley  
Shinya Yamamoto

Zhe Zhang

Stephan Zuchner
