# Supplementary material
Source: PubMed Central journal article supplement (PMC11080285)
Supplement: mmc6.pdf [file mmc6.pdf]

---

# The clinical utility and diagnostic implementation of human subject cell transdifferentiation followed by RNA sequencing

## Authors

Shenglan Li, Sen Zhao, Jefferson C. Sinson, ...,  
Christine M. Eng, Brendan Lee, Pengfei Liu

## Correspondence

[pengfeil@bcm.edu](mailto:pengfeil@bcm.edu)

**Our RNA-seq analysis workflow uses transdifferentiated fibroblasts to enhance the genetic diagnosis of neurological disorders. It identifies neuron-specific aberrant transcriptional events, resulting in diagnoses in 25% of cases. This demonstrates that transdifferentiation of clinically accessible tissues is a feasible approach to improve the clinical utilization of diagnostic whole transcriptome analysis.**

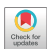

# The clinical utility and diagnostic implementation of human subject cell transdifferentiation followed by RNA sequencing

Shenglan Li,<sup>1</sup> Sen Zhao,<sup>1</sup> Jefferson C. Sinson,<sup>1</sup> Aleksandar Bajic,<sup>1,2,3</sup> Jill A. Rosenfeld,<sup>1</sup> Matthew B. Neeley,<sup>4</sup> Mezthly Pena,<sup>1</sup> Kim C. Worley,<sup>1</sup> Lindsay C. Burrage,<sup>1,6</sup> Monika Weisz-Hubshman,<sup>1,6</sup> Shamika Ketkar,<sup>1</sup> William J. Craigen,<sup>1,6</sup> Gary D. Clark,<sup>5,6</sup> Seema Lalani,<sup>1,6</sup> Carlos A. Bacino,<sup>1,6</sup> Keren Machol,<sup>1,6</sup> Hsiao-Tuan Chao (趙孝端),<sup>1,2,5,6,7,8,9</sup> Lorraine Potocki,<sup>1,6</sup> Lisa Emrick,<sup>5,6</sup> Jennifer Sheppard,<sup>2,5</sup> My T.T. Nguyen,<sup>2</sup> Anahita Khoramnia,<sup>1</sup> Paula Patricia Hernandez,<sup>1</sup> Sandesh CS. Nagamani,<sup>1,6</sup> Zhandong Liu,<sup>2,4,5</sup> Undiagnosed Diseases Network, Christine M. Eng,<sup>1,10</sup> Brendan Lee,<sup>1,6</sup> and Pengfei Liu<sup>1,10,\*</sup>

## Summary

RNA sequencing (RNA-seq) has recently been used in translational research settings to facilitate diagnoses of Mendelian disorders. A significant obstacle for clinical laboratories in adopting RNA-seq is the low or absent expression of a significant number of disease-associated genes/transcripts in clinically accessible samples. As this is especially problematic in neurological diseases, we developed a clinical diagnostic approach that enhanced the detection and evaluation of tissue-specific genes/transcripts through fibroblast-to-neuron cell transdifferentiation. The approach is designed specifically to suit clinical implementation, emphasizing simplicity, cost effectiveness, turnaround time, and reproducibility. For clinical validation, we generated induced neurons (iNeurons) from 71 individuals with primary neurological phenotypes recruited to the Undiagnosed Diseases Network. The overall diagnostic yield was 25.4%. Over a quarter of the diagnostic findings benefited from transdifferentiation and could not be achieved by fibroblast RNA-seq alone. This iNeuron transcriptomic approach can be effectively integrated into diagnostic whole-transcriptome evaluation of individuals with genetic disorders.

## Introduction

A prompt and accurate molecular diagnosis is critical for appropriately managing individuals with presumed Mendelian disorders. Despite advancements in molecular diagnostics through clinical exome sequencing (ES) and whole genome sequencing (WGS), more than half of these sequencing evaluations fail to yield definitive diagnoses.<sup>1–10</sup> Various *in silico* prediction tools have been developed to assess the impact of a variant on gene expression and splicing to address this issue.<sup>11–14</sup> However, without functional validation, many noncoding and splice region variants remain of uncertain clinical significance.<sup>15–17</sup>

Complementary to DNA sequencing, RNA sequencing (RNA-seq) has recently been utilized to detect abnormalities in the transcriptome, such as aberrant expression, splicing, and mono-allelic expression (MAE), resulting in an increase of molecular diagnostic yield by about 7.5%–36%.<sup>18–27</sup> A significant obstacle in implementing RNA-seq for clinical diagnosis is the tissue specificity for gene expression. Adequate expression of gene(s) of interest in the study specimen is essential for any diagnostic pipeline. However, obtaining sufficient expression of tissue-specific

genes in clinically accessible tissues (CATs), namely blood, fibroblasts, or muscle, can be difficult.<sup>20,28</sup> For instance, in many Mendelian disorders characterized with intellectual and developmental disability, the underlying genetic defect may disrupt a disease-associated gene that is specifically expressed in the brain, and much less so if at all in non-neuronal cells.<sup>28</sup> Furthermore, even when a gene has an abundant overall expression, its isoforms may be differentially detected depending on the tissue type due to tissue-specific alternative splicing, alternative cleavage, and polyadenylation events.<sup>29,30</sup> A comprehensive analysis of RNA splicing events across different tissues revealed that approximately 40% of genes undergoing splicing were underrepresented in at least one CAT.<sup>28</sup> Therefore, it is essential to address the limitation of tissue-specific transcript expression to improve the clinical implementation for diagnostic RNA-seq.

Transdifferentiation (direct reprogramming) of CATs into disease-relevant cell types holds promise for overcoming these obstacles. Compared to induced pluripotent stem cell (iPSC) reprogramming followed by differentiation, transdifferentiation provides a faster, more cost-effective, and potentially more genomically stable process to

<sup>1</sup>Department of Molecular and Human Genetics, Baylor College of Medicine, Houston, TX, USA; <sup>2</sup>Jan and Dan Duncan Neurological Research Institute at Texas Children's Hospital, Houston, TX, USA; <sup>3</sup>Advanced Technology Cores, Baylor College of Medicine, Houston, TX, USA; <sup>4</sup>Graduate Program in Quantitative and Computational Biosciences, Baylor College of Medicine, Houston, TX, USA; <sup>5</sup>Department of Pediatrics, Section of Neurology, Baylor College of Medicine, Houston, TX, USA; <sup>6</sup>Texas Children's Hospital, Houston, TX, USA; <sup>7</sup>Department of Neuroscience, Baylor College of Medicine, Houston, TX, USA; <sup>8</sup>Cain Pediatric Research Foundation Laboratories, Jan and Dan Duncan Neurological Research Institute at Texas Children's Hospital, Houston, TX, USA; <sup>9</sup>McNair Medical Institute, The Robert and Janice McNair Foundation, Houston, TX, USA; <sup>10</sup>Baylor Genetics, Houston, TX, USA

\*Correspondence: [pengfeil@bcm.edu](mailto:pengfeil@bcm.edu)

<https://doi.org/10.1016/j.ajhg.2024.03.007>

© 2024 American Society of Human Genetics.

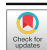

obtain the desired tissue types without differentiating through an intermediary pluripotency state.<sup>31,32</sup> These attributes make transdifferentiation an attractive strategy for clinical diagnostic workflows that routinely process large volumes of samples. Human skin-derived fibroblasts can be transdifferentiated into neurons<sup>33</sup> (iNeurons). This direct reprogramming protocol, if adapted to a diagnostic setting, can potentially enhance the detection of neuron-specific disease-associated gene expression, thereby improving the molecular diagnosis of Mendelian disorders with neurological phenotypes, which represent the most prevalent phenotypic manifestation among all genetic disorders for which clinical genetic testing is performed. Additionally, this approach can provide valuable insights into the underlying mechanisms of neurological disorders, which aids in interpreting genetic variants or for a transcriptome-first analytical approach.

In this study, we present an RNA-seq analysis workflow utilizing transdifferentiated fibroblasts to enhance the genetic diagnoses of neurological disorders. Our proposed workflow is characterized by its simplicity, cost effectiveness, and timely execution (6–8 weeks) while demonstrating its robustness. Notably, our approach effectively identified neuron-specific aberrant transcriptional events, including but not limited to aberrant splicing, aberrant expression, and mono-allelic expression, resulting in a diagnostic yield of 25.4% (18/71) in individuals with neurological disorders who were recruited to the Undiagnosed Diseases Network (UDN). Impressively, the iNeuron RNA-seq approach proved effective in providing key evidence to finalize molecular diagnoses after an uninformative RNA-seq analysis using fibroblast samples, benefiting 27.7% (5/18) individuals. Our work demonstrates that transdifferentiation of CATs is an effective and feasible approach to improve the clinical utilization of diagnostic whole transcriptomic analysis for individuals with rare genetic disorders.

## Material and methods

### Compendium

A cohort of 75 probands, along with 9 family members and 3 unrelated controls, was recruited from the UDN Baylor College of Medicine (BCM) clinical site. Enrollment criteria mandated that each individual present at least one primary neurological phenotype. WGS/ES data from 75 probands and 7 family members was obtained from UDN sequencing core. Fibroblast-to-neuron transdifferentiation was performed for all individuals. Four probands whose iNeuron data did not meet the quality control (QC) standards were removed from the final analysis.

### Lentivirus production

HEK-293FT cells, at 70%–80% confluence, were transfected using jetPRIME (114-15, Polyplus-transfection), following the specified protocol of the transfection reagent. The pLVX-UbC-rtTA-Ngn2:2A:Ascl1 plasmid was kindly provided by Dr. Fred Gage (Addgene plasmid # 127289). To package the target plasmid, we used second-generation lentiviral packaging plasmids (gift from

Dr. Didier Trono). This included two helper plasmids: psPAX2, which contained a minimal HIV enzyme set (Addgene #12260), and pMD2.g, encoding the VSV-G envelope (Addgene #12259). Lentivirus-containing supernatant was collected at 24- and 48-h points and concentrated overnight at 4°C, following the Lenti-X Concentrator (631232, Takara) protocol. The prepared virus was either used immediately or stored in aliquots at –80°C for future applications.

### Transdifferentiation of fibroblasts to neurons

Human primary dermal fibroblasts established from skin punch biopsies were maintained in high-glucose DMEM medium, supplemented with 10% fetal bovine serum (FBS), 1% non-essential amino acid (NEAA), and 1% penicillin-streptomycin (P-S). The protocol for transdifferentiation of fibroblasts into neurons was adapted from the method established by Fred Gage's group.<sup>33</sup> Briefly, human primary dermal fibroblasts were transduced with lentivirus particles containing a TetON cassette for the doxycycline-induced overexpression of *NEUROG2* and *ASCL1* (pLVX-UbC-rtTA-Ngn2:2A:Ascl1, Addgene, #127289). The standard FBS in the culture medium was replaced with tetracycline-free FBS. Two days later, 2 µg/mL puromycin was added in the culture medium for 7 days. Following at least three passages after viral infection, the fibroblasts were seeded on Cultrex-coated plates at a density of 50,000/cm<sup>2</sup>. On the following day, the culture medium was switched to neuron conversion (NeuC) medium, consisting of 1:1 DMEM/F12 medium and neurobasal medium, supplemented with 1 X N2, 1 X B27, 1 X P-S, 1 µg/mL laminin (R&D, #3400-010-02), 200 µM Dibutyryl cyclic-AMP (Tocris, #1141), 0.5 µM LDN193189 (Tocris, #6053), 5 µM A83-1 (Tocris, #2939), 3 µM CHIR99021 (Tocris, #4423), 5 µM Forskolin (Tocris, #1099), 10 µM SB431542, #1614), 1 µM Pyrintegrin (Tocris, #4978), 7.5 µM KC7F2 (Tocris, #4324), 0.175 µM ZM336372 (Cayman, #10010367), 0.1 µM AZ960 (Cayman, #16731), and 2 µg/mL doxycycline. Medium was changed 3 times a week for 3 weeks.

### Immunocytochemistry

Fibroblasts infected with a vector for the overexpression of *NEUROG2* and *ASCL1* were plated and cultivated on glass coverslips in the presence of doxycycline for 21 days. The iNeurons were fixed using a 4% paraformaldehyde solution and then treated with a blocking buffer containing 5% goat serum, 1% bovine serum albumin, and 0.1% Triton X-100 for 30 min. Subsequently, the cells were exposed to primary antibodies overnight at 4°C. The appropriate Alexa Fluor secondary antibodies were utilized. The primary antibodies used were Tubulin β-III (1:200, R&D systems, #MAB1195) and MAP2 (1:500, Millipore, #AB5622). Nuclei were stained using DAPI (Sigma). Imaging was conducted using a Zeiss AxioVision microscope.

### RNA sequencing

Total RNA was extracted from iNeurons using the RNeasy mini kit (Qiagen) following the manufacturer's instructions with the inclusion of an on-column gDNA removal step. The integrity and quality of the RNA were assessed using the Qubit 4 Fluorometer and the Qubit RNA HS Assay Kit (ThermoFisher). Library preparation was performed with the TruSeq Stranded mRNA Library Prep Kit (Illumina). The constructed libraries underwent 150 bp paired-end sequencing at a depth of approximately 100–150 million reads per sample. The obtained sequencing data were processed utilizing the Sentieon pipeline with alignment to the GRCh38/hg38 reference sequence employing STAR-v2.7.10a. Gene expression levels were quantified using RNA-SeQC, which generated

Transcripts Per Million (TPM) values for expressed genes in each sample.<sup>34,35</sup> The processed alignment files were subsequently utilized for outlier detection. The RNA-seq data were visualized using the Integrative Genomics Viewer (IGV) software.

### Amplicon-based NGS

Amplicon-based NGS is comprised of a two-step PCR library preparation workflow that generates ready to sequence libraries. After the DNA is extracted using Qiagen's QIAamp DNA Mini Kit, the targeted region is amplified using FastStart Taq DNA Polymerase from Roche. The primers are designed to include a linker region on each end that act as a binding site for the secondary PCR primers. The amplicon from the first PCR is purified using 0.9× AMPure XP beads and is used as a template for the secondary PCR. The second pair of primers consists of flow cell binding sequences, sequencing primer sites, and barcodes that will be included into the template via PCR. The completed library is ready to sequence after a final AMPure XP bead purification of the secondary PCR product.

### Differential gene expression and functional enrichment analysis

Differential gene expression analysis between 87 iNeurons and 77 cultured fibroblasts was conducted using the DESeq2 package in the R programming language. The criterion for selecting differentially expressed genes (DEGs) was defined as a fold change (FC) > 2 and adjusted  $p < 0.05$ . To gain insights into the biological functions of the upregulated DEGs in iNeurons, functional enrichment analysis was performed using the Metascape tool.<sup>36</sup>

### Quality control of iNeurons

The iNeuron score (iN\_Score) was calculated as the geometric mean of the TPM values of the top 500 DEGs that were up-regulated in iNeurons. To assess the relationship between *ASCL1* qPCR expression levels in intermediate fibroblasts, iNeuron *ASCL1* qPCR expression, and iNeuron RNA-seq *ASCL1* TPM values, Spearman correlation analysis was conducted. Receiver operating characteristic (ROC) curve analysis was performed to assess whether the expression levels of *ASCL1* or *NEUROG2* in the iNeuron RNA-seq data could serve as predictors of transdifferentiation quality. This analysis utilized the pROC package in R. To identify potential chromosomal aneuploidies that may arise during the transdifferentiation process, copy number variation (CNV) analysis was performed on both the RNA and the DNA sequencing data. The RNAseqCNV package in R was used for RNA-based CNV analysis,<sup>37</sup> whereas CNVpytor was utilized for the DNA-based analysis.<sup>38</sup>

### qRT-PCR

RNA was transcribed into complementary DNA (cDNA) using the iScript cDNA Synthesis Kit (Bio-Rad). qRT-PCR was performed to determine mRNA levels using the SsoAdvanced Universal SYBR Green Supermix (Bio-Rad). *GAPDH* was used as an internal control. The relative fold change in gene expression was determined using the comparative threshold cycle  $\Delta\Delta C_t$  method.

### Outlier detection

The RNA outliers detection pipeline (DROP) was utilized with a permissive threshold (OUTRIDER:  $p < 0.05$ ; FRASER:  $p < 0.05$ ; Delta > 0.2) to identify potential outliers in gene expression.<sup>39</sup> In order to prioritize the expression outliers, haploinsufficient genes

( $Z < 0$ ), recessive genes ( $Z < 0$ ), and triplosensitive genes ( $Z > 0$ ) were flagged using data from ClinGen and OMIM. Potential expression or splicing outliers were cross-referenced with OMIM genes, with phenotype-driven prioritization performed by Phe-noApt.<sup>40</sup> DNA findings from ES/WGS were supplemented with predictions from SpliceAI,<sup>11</sup> if applicable, to correlate and substantiate relevant RNA findings.

### Panels with various neurological phenotypes

The comprehensive disease-gene lists were based on NIH Genetic testing registry, NHS National Genomic Test, ClinGen, and commercially available panels.

### Tissue-specific isoform activation in iNeurons

We computationally measured a subset of tissue-specific transcripts, those that are tagged by tissue-specific exons, to estimate the overall abundance of all tissue-specific isoforms. To calculate the exon-tagged isoform activation in iNeurons, we compared RNA-Seq results from all our iNeuron samples ( $n = 82$ ) and a set of fibroblast samples ( $n = 77$ ). All transcripts from a gene were collapsed into an artificial transcript. The collapsed transcript was used to calculate the gene-level TPM ( $TPM_{gene}$ ), following the conventional way of computing gene-level TPM.<sup>41</sup> Each exon from the collapsed transcript was used to calculate its individual exon-level TPM ( $TPM_{\{gene, exon\}}$ ). The median values for each  $TPM_{\{gene, exon\}}$  and  $TPM_{gene}$  were computed across the iNeuron and the fibroblast cohorts. Then, the relative ratio of the exon-specific fold change over the gene-level fold change was computed, denoted as  $\lambda$ . An equation is represented below, where  $TPM'$  denotes value from iNeurons and  $TPM$  denotes value from fibroblasts.

$$\lambda_{\{gene_k, exon_i\}} = \frac{med(TPM'_{\{gene_k, exon_i\}})}{med(TPM_{\{gene_k, exon_i\}})} \bigg/ \frac{med(TPM'_{gene_k})}{med(TPM_{gene_k})}$$

In this work, we considered a relative exon/gene activation ratio ( $\lambda$ ) over two as an indication that the exon-tagged transcript is enriched in iNeurons. When the transcript is neuron enriched and has a fibroblast TPM of <1, the transcript is considered neuron specific.

### Statistics

The iN\_Score between iNeurons and fibroblast was assessed using a Student's t test.  $p < 0.05$  was deemed significant. The analyses of DEGs, exons and outlier detection are described above.

### Ethics approval

The Institutional Review Boards approved the study at the National Human Genome Research Institute (15HG0130) and BCM (H-34433). Written informed consent was obtained from all study participants.

### Results

#### Limited expression of genes associated with neurological phenotypes in CATs

We compiled a list of 2,721 OMIM genes associated with various neurological phenotypes (OMIM-N). We first performed a computational analysis to evaluate the level of gene expression in human fibroblasts. In both the GTEx

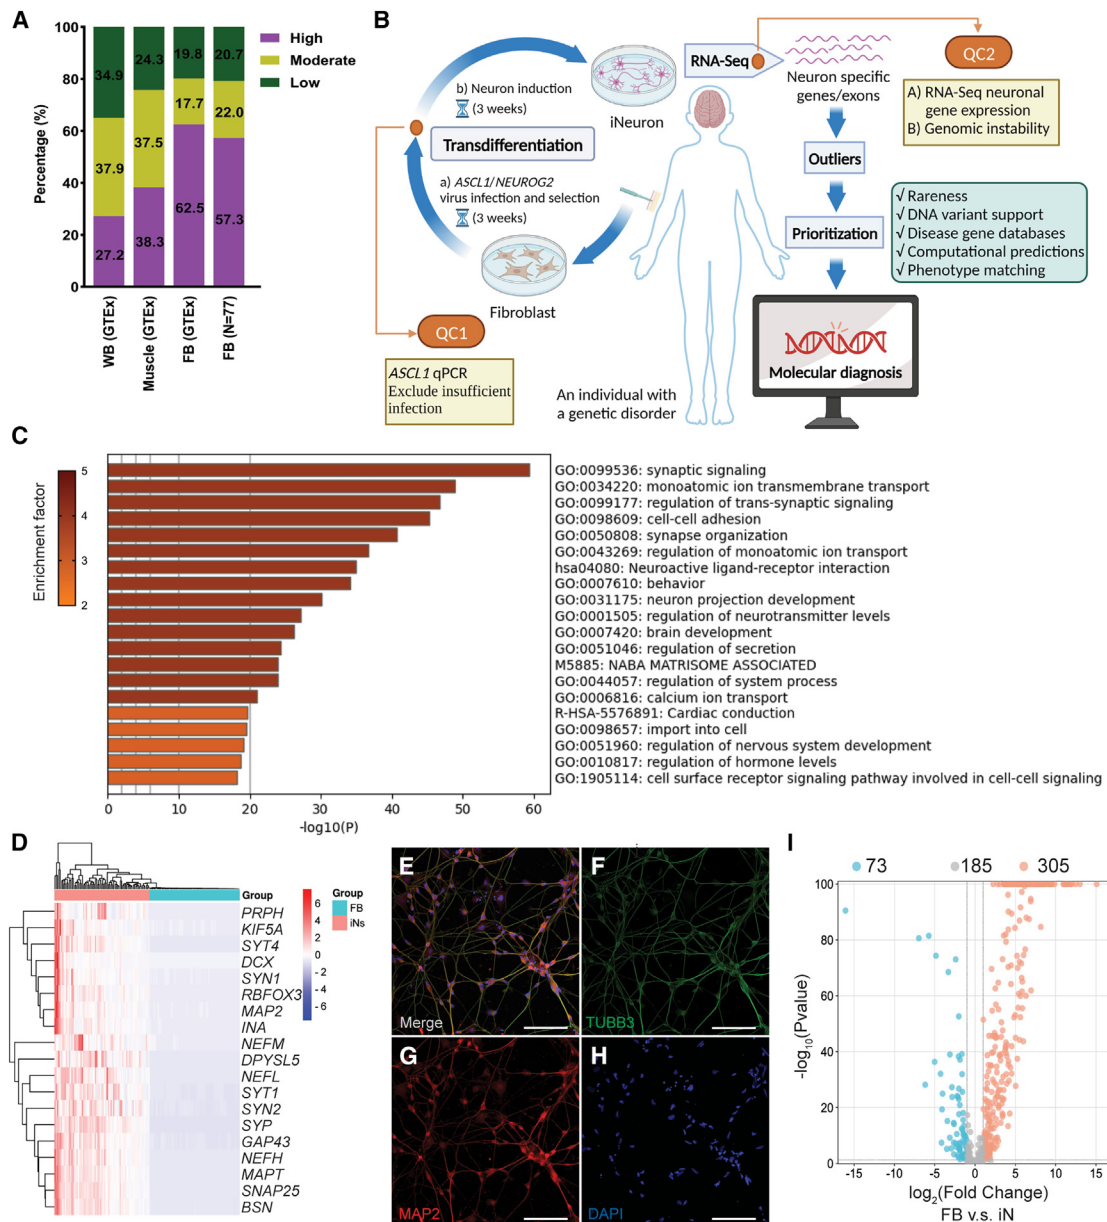

**Figure 1. Activation of low-expression OMIM-N genes in participants' fibroblasts**

(A) Expression levels of OMIM-N genes in clinically assessable tissues. Gene expression levels were classified as follows: low (TPM < 1), moderate (TPM ≥ 1 and <10), and high (TPM ≥ 10). Fibroblasts (FB) RNA-seq data from GTEx and UDN participants (n = 77) were used for the assessment.

(B) Schematic of the workflow of iNeuron transdifferentiation and RNA-seq. Created with BioRender.com.

(C) Functional enrichment analysis of DEGs up-regulated in iNeurons.

(D) Robust expression of neuron-specific genes in iNeurons.

(E–H) Immunofluorescence staining of neuronal makers Tubulin β-III (TUBB3) (F) and MAP2 (G) in iNeurons. Nuclei were stained using DAPI (H). The merged image is shown in (E). Scale bar represents 100 μm.

(I) Volcano plot showing activation of low-expression OMIM-N genes.

dataset and independent RNA-seq performed in fibroblasts in this study (n = 77), approximately 20% or 35% of the genes were deemed as low expression (TPM < 1) in fibroblasts or whole blood, making their detection challenging even with deeper sequencing (Figure 1A; Table S1). We next assembled eight panels of genes associated with the following neurological phenotypes: intellectual disability, brain malformations (BM), autism spectrum disorder (ASD), epilepsy, ataxia, neuropathy, neuromuscular disorder,

and leukodystrophy. Approximately 10%–23% of genes in these panels are lowly expressed in fibroblasts, while the range of low-expression genes is 26%–37% in whole blood. This highlights the intrinsic limitation of using CATs for the molecular diagnosis of neurological disorders (Table S1). Interventions to activate these genes are needed to improve the representation of genes linked to Mendelian neurological disorders in RNA-seq data from CATs.

## Transdifferentiation through *NEUROG2-ASCL1* manipulation

Manipulations of pro-neuronal transcription factors, microRNA, and target genes regulated by REST/NRSF have been shown to facilitate the direct conversion of human somatic cells, such as skin fibroblasts, into functional neurons.<sup>33,42–44</sup> To modulate neuronal gene expression in human fibroblasts, we evaluated the effectiveness of four published neuronal induction protocols in combination with the chemical modulation of multiple cellular signaling pathways. These protocols include (1) overexpression of the pro-neuronal transcription factors *NEUROG2* and *ASCL1*<sup>33</sup>; (2) co-expression of the microRNA *miR-9/9\**, *miR-124*, and the anti-apoptotic gene *BCL2L1*<sup>44</sup>; (3) a combination of (1) and (2); and (4) DBD-REST-VP16,<sup>43</sup> involving the replacement of REST/NRSF repressor domains with the activation domain of the viral activator VP16 (Figure S1).

We evaluated the four protocols in a fibroblast cell line from a healthy individual. The results revealed comparable conversion rates and optimal morphology of bipolar neurons after 21 days of induction. The protocol reported by Dr. Fred Gage's group,<sup>33,45</sup> combining *NEUROG2-ASCL1* and a chemical cocktail, elicited the most robust activation of neuron-specific genes and genes related to various neurological phenotypes (Table S2). Extending the induction time to 28 days did not result in a significant increase in the activation of the target genes (Table S3). Therefore, this approach was selected for subsequent transdifferentiation experiments using fibroblasts from individuals with neurological disorders (Figure 1B).

Using the same fibroblast cell line, we further compared the transcriptome profiles of iNeuron with two types of human-induced pluripotent stem cell (iPSC)-derived neurons. Of the two types of iPSC-derived neurons, Neuron\_1 underwent differentiation from iPSCs, while Neuron\_2 was generated through the overexpression of the neuronal transcription factor *Neurog2* in iPSCs. Correlation analysis revealed that the fibroblast-direct-converted iNeurons exhibited a transcriptional profile more closely aligned with hiPSC-derived neurons ( $r = 0.89$ ) than with the donor's fibroblasts ( $r = 0.76$ ), indicating a cellular identity shift after transdifferentiation (Figure S2A). To evaluate the degree of similarity between the transcriptional profile of iNeurons and those of the human neural tissues, we conducted a correlation analysis comparing our iNeuron data and data from GTEx. The analysis demonstrated a high correlation between iNeurons and various neural tissues ( $r > 0.9$ ), in contrast to cultured fibroblasts, which showed a weaker correlation ( $r < 0.7$ ) (Figure S2A).

## Transdifferentiation of individual cell lines robustly activates low-expression neurological disease-associated genes

We applied the *NEUROG2-ASCL1* transdifferentiation protocol to a cohort of participants' samples to assess its clinical utility. The study cohort includes 75 probands with at least one primary neurological phenotype who were re-

cruited from the UDN BCM clinical site, along with 9 of their family members and 3 unrelated controls. The majority of probands ( $n = 63$ ; 84.0%) were pediatric, and almost half ( $n = 37$ ; 49.3%) were male (Table 1). In addition, 66.7% of probands presented with intellectual disability, while 40.0% presented with a brain malformation. A detailed summary of the prevalence of distinct neurological phenotypes is provided in Table 1. DNA sequencing data were available for 38 individuals with WGS and 37 individuals with ES. We performed skin biopsy and neuron transdifferentiation on all participants.

RNA-seq of 87 iNeurons revealed a distinct transcriptome expression profile compared to the cohort of 77 cultured fibroblasts, characterized by the up-regulation of 4,902 differentially expressed genes (DEGs) and 3,558 down-regulated DEGs. In addition, the up-regulated DEGs in iNeurons exhibited significant enrichment in functional categories related to various aspects of nervous system development, including synaptic signaling, ion transmembrane transportation, and neuron projection interaction (Figure 1C, Data S1). RNA-seq analysis also showed robust expression of a list of neuron-specific genes associated with axon formation, dendrite development, growth cone dynamics, and synapse formation (Figure 1D). Immunocytochemical staining confirmed the presence of neuronal markers such as Tubulin  $\beta$ -III and MAP2 (Figures 1E–1H). Consistent with expectations reported previously,<sup>33</sup> iNeuron cells generated from transdifferentiation predominantly expressed markers of glutamatergic and GABAergic neurons, while markers for dopaminergic, serotonergic, cholinergic, and glycinergic neurons exhibited inconsistent activation (Figures S2B and S2C). In our analysis focusing on Mendelian disease-associated genes, DEG analysis between fibroblasts and iNeurons showed that more than half (54.2%, 305/563) of OMIM-N genes with low expression (TPM < 1) in fibroblasts were up-regulated in iNeurons (Figure 1I). Across eight panels of neurological disease-associated genes, the percentages of up-regulated genes varied from 53.8% to 91.7% (Table 2; Figure S3). We defined a status “activated and actionable” as a gene in iNeurons having (1) an up-regulated DEG compared to fibroblast and (2) a clinically analyzable TPM of  $\geq 1$ . Of the OMIM-N genes, 23.6% (133/563) satisfied this criterion, while 15.4%–42.9% of genes from the eight neurological disease panels we assembled were deemed “activated and actionable” (Table 2). The two gene panels of neuropathy and brain malformation displayed the highest rates of “activation and actionability” (42.9% and 37.5%, respectively), while the neuromuscular disorder gene panel had the lowest rate (15.4%) (Table 2). The variability in activation rates across panels implies varying diagnostic benefits of applying this protocol for individuals with different types of neurological disorders. To provide a theoretical context starting from whole blood instead of fibroblasts, a high fraction of genes from the eight panels, ranging from 48.6% to 75.8%, reached the status of “activated and actionable” if converted to iNeurons (Table S4). Further analysis of the expression data reveals high levels of concordance between

**Table 1. Demographic characteristics and types of neurological phenotypes included in the study**

|                                | Number | Percentage |
|--------------------------------|--------|------------|
| <b>Sex</b>                     |        |            |
| Male                           | 37     | 49.3       |
| Female                         | 38     | 50.7       |
| <b>Age</b>                     |        |            |
| Adult                          | 12     | 16.0       |
| Pediatric                      | 63     | 84.0       |
| <b>Neurological phenotypes</b> |        |            |
| Intellectual disability        | 50     | 66.7       |
| Brain malformation             | 30     | 40.0       |
| Microcephaly                   | 19     | 25.3       |
| Macrocephaly                   | 5      | 6.7        |
| Epilepsy                       | 31     | 41.3       |
| Hypotonia                      | 24     | 32.0       |
| Dystonia                       | 14     | 18.7       |
| Ataxia                         | 8      | 10.7       |
| Leukoencephalopathy            | 4      | 5.3        |
| ASD                            | 4      | 5.3        |
| ADHD                           | 3      | 4.0        |
| Hearing loss                   | 6      | 8.0        |
| Eye disease                    | 14     | 18.7       |
| Neuropathy                     | 5      | 6.7        |
| Neuromuscular disorders        | 7      | 9.3        |

More than one neurological phenotype may be present in any individual.

the iNeuron cohort and adult cortex samples from GTEx in the expression profiles of neurological disease-associated genes (Figure S2D).

#### The infection efficiency, induction quality, and genomic integrity of iNeurons are evaluated by quality control measurements

The quality, reproducibility, and integrity of the transdifferentiation of cell lines are associated with various factors, such as lentiviral titer, genetic traits, cell viability, and technical variables. We developed two potentially interdependent metrics to evaluate the overall quality of the transdifferentiation process: (1) targeted expression levels of the two transcriptional factors *ASCL1-NEUROG2* introduced by the lentiviral transfection and (2) global expression levels of genes that are expected to be activated in this protocol (Figure 2A).

*ASCL1* and *NEUROG2* have median expression TPMs at 912.12 and 1250.81 in our iNeuron RNA-seq data, respectively. As expected, these two neuronal transcription factors are not expressed in our fibroblast RNA-seq data. We arbitrarily set 10% of the median iNeuron TPM for these two genes as cutoffs to indicate whether lentiviral-mediated transdifferentiation was successful. We identified

four samples from the cohort that did not pass the 10% median iNeuron TPM threshold. The transdifferentiation experiment was repeated for these four samples, making it a total of 91 iNeurons samples (from 87 individuals) contributing to the entire dataset to be subject to downstream QC selection (Figure 2B).

To evaluate the global expression of genes activated in iNeurons and enhance the robustness of transdifferentiation quality, we established an iNeuron score (iN\_Score), which is calculated by the geometric mean of the leading 500 up-regulated DEGs in iNeurons. The iN\_Score is an effective measurement to differentiate processed iNeurons versus fibroblast cells without manipulations (median iN\_Score of 2.84 in transdifferentiated cells and 0.02 in unprocessed fibroblasts,  $p < 0.0001$ , Figure 2C) based on data from our sample cohorts of 91 iNeuron lines and 77 fibroblast lines. A cutoff value for the iN\_Score (0.83) was empirically determined at the tenth percentile of all scores from our iNeuron sample cohort. Nine iNeuron samples from eight individuals were identified to have poor induction quality using this criterion, and they were excluded from downstream analysis.

iN\_Score offers a broader perspective than the traditional reliance on a limited set of markers, which is more prone to

**Table 2. Activation of genes associated with neurological disorders in iNeurons**

| Category                       | No. of low- expression genes in fibroblasts | Up-regulated in iN |      | Activated and actionable in iN |      |
|--------------------------------|---------------------------------------------|--------------------|------|--------------------------------|------|
|                                |                                             | No.                | %    | No.                            | %    |
| Neurological OMIM              | 563                                         | 305                | 54.2 | 133                            | 23.6 |
| Intellectual disability panel  | 231                                         | 156                | 67.5 | 75                             | 32.5 |
| Brain malformation panel       | 24                                          | 22                 | 91.7 | 9                              | 37.5 |
| Autism spectrum disorder panel | 69                                          | 53                 | 76.8 | 22                             | 31.9 |
| Epilepsy panel                 | 246                                         | 156                | 63.4 | 72                             | 29.3 |
| Ataxia panel                   | 292                                         | 176                | 60.3 | 70                             | 24.0 |
| Neuropathy panel               | 21                                          | 13                 | 61.9 | 9                              | 42.9 |
| Neuromuscular disorders panel  | 52                                          | 28                 | 53.8 | 8                              | 15.4 |
| Leukodystrophy panel           | 90                                          | 51                 | 56.7 | 28                             | 31.1 |

stochastic variation. In addition, immunostaining requires additional labor, training, and reagent costs, posing a challenge to efficient clinical implementation. To enhance the interpretability of the iN\_Score, we highlighted three representative iNeuron samples, correlating their iN\_Scores with the transdifferentiation efficiency deduced from staining (Figures S4A–S4D). The first sample exhibited a low transdifferentiation efficiency, falling below our QC threshold, with a low iN\_Score of 0.75 and a conversion rate of ~20%. The second sample achieved a marginally acceptable iN\_Score of 1.91, corresponding to an estimated conversion rate of 40%. The third sample with a high iN\_Score of 5.42 demonstrated efficiency exceeding 90% (Figures S4A–S4D). Expression levels of established mature neuron markers such as *MAP2*, *NeuN* (*RBF3*), *NEFH*, *Tau* (*MAPT*), *SYP*, and *GAP43* in 3 samples also showed differences corresponding to iN\_Score and transdifferentiation efficiency (Figure S4E). These findings corroborate the effectiveness of the iN\_Score in accurately assessing iNeuron transdifferentiation quality and predicting conversion rates.

Of note, the original failed samples from the four specimens with low *ASCL1-NEUROG2* expressions all had low iN\_Scores. After repeat, three samples demonstrated improvements in lentiviral-mediated transdifferentiation (increased *ASCL1* and *NEUROG2* expressions) and in neuron induction (passing iN\_Scores); one sample remained poorly induced despite satisfactory expressions of *ASCL1* and *NEUROG2*. The repeated failure is potentially attributed to other confounding factors beyond lentiviral infection (Table S5).

Based on the above empirical observations, we hypothesized that the *ASCL1* and *NEUROG2* expressions can serve as predictive markers for the quality of iNeurons RNA-seq data. This hypothesis offers an attractive quality checkpoint at an early stage of the workflow for intervention to prevent poor-quality samples from going through the transdifferentiation procedure. The receiver operating characteristic (ROC) curve analysis indicated that both *ASCL1* and *NEUROG2* expression levels in the iNeuron

RNA-seq data were highly predictive of a passing iN\_Score (Figure 2D). By setting a TPM cutoff at 110 for *ASCL1*, we achieved 100% sensitivity in excluding samples with poor induction due to limited infection, with an acceptable false positive rate of 3.5% (3/85) (Figure 2E). To establish a *de facto* checkpoint following lentivirus infection (rather than examining expression levels later after cell culture and RNA-seq are completed), we selected seven samples to collect cell culture intermediates at the stage of 24 h post-induction. RNA was extracted for qPCR analysis of *ASCL1* expression. The qPCR measurements correlated highly with the TPM of RNA-seq data from the iNeurons ( $R^2 = 0.972$ ,  $p < 0.001$ , Figure 2F). Therefore, a simple qPCR QC checkpoint assay targeting *ASCL1* gene expression can be devised to exclude samples with low-grade infection, eliminating the need for further costly and time-consuming induction and RNA-seq analyses on a potentially failed sample.

It has been shown that genomic instabilities including aneuploidies and structural chromosome changes may arise from the preparation of iPSCs and embryonic stem cells (ESCs).<sup>46,47</sup> To rule out such confounding factors, we performed CNV analysis using RNA-seq data from the iNeurons. This RNA-seq-based computational analysis can detect chromosomal aneuploidies (Figure S5). No significant chromosomal changes were detected in the iNeuron samples (Figure 2G), except for one sample with a possible gain of chromosome 21 (Figure S5).<sup>37</sup> As an additional layer of validation, WGS at 50×–100× (mean 70×) coverage was performed on the intermediate fibroblasts and iNeurons derived from seven individuals. At this sequencing depth, WGS has been shown to confidently detect CNVs at the kilobase resolution, or conservatively speaking at the resolution of hundreds of kilobases.<sup>48,49</sup> No CNVs exceeding 0.5 Mb were detected among the tested samples. The above findings confirm that no apparent structural genomic alterations arose during the transdifferentiation process (Figure 2H).

Summarizing the experiences from this study, we developed a detailed list of recommendations for QC of using



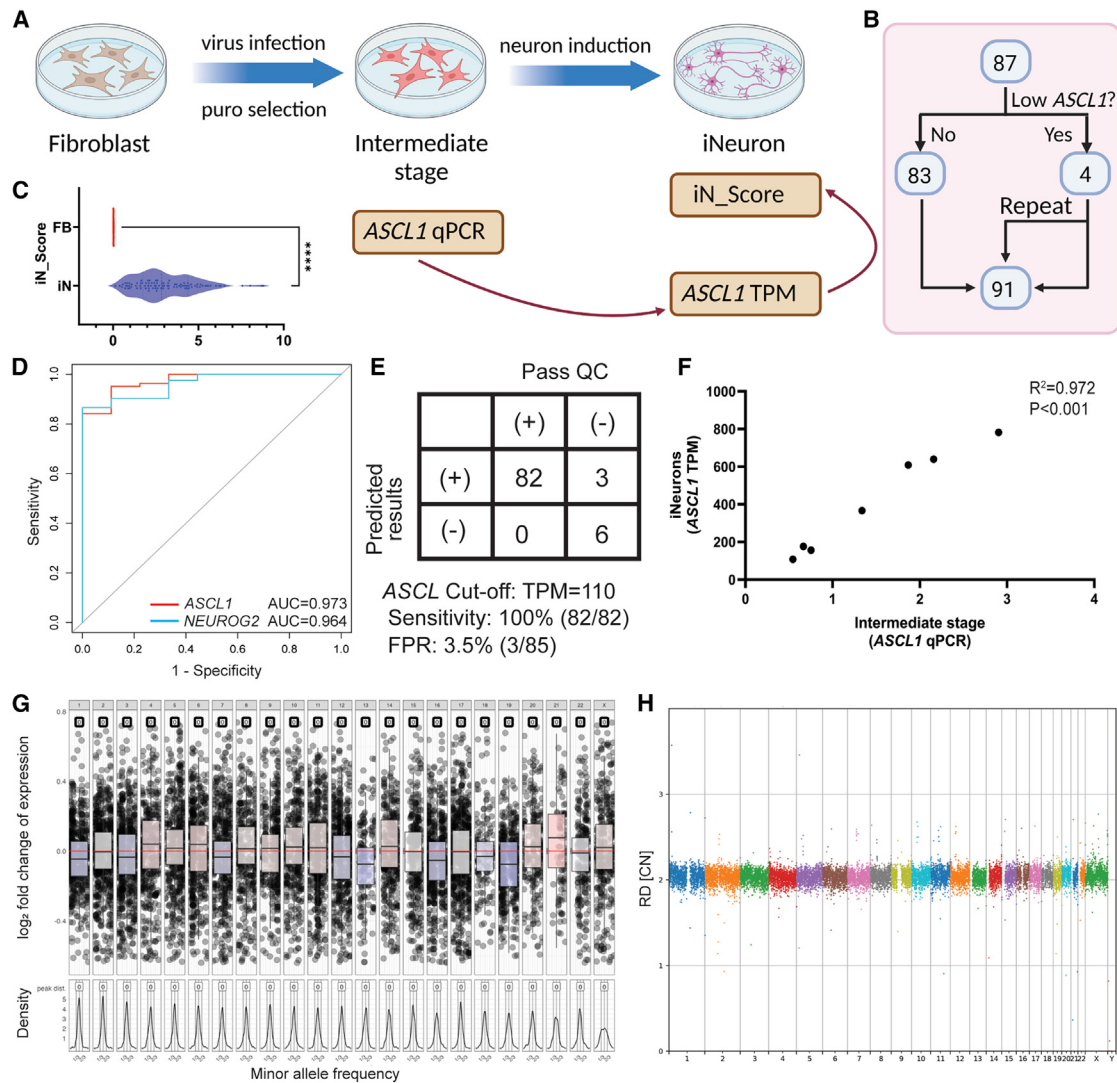

**Figure 2. Multiple quality control measurements during transdifferentiation process**

(A) Schematic for determining *ASCL1* qPCR as a critical step in QC to identify inadequate virus infection. Created with [BioRender.com](https://www.biorender.com/).  
 (B) All iNeurons samples used for QC analysis.  
 (C) iN\_Score comparison between iNeurons and fibroblasts, represented by median with violin plot. Statistical significance denoted by \*\*\*\*  $p < 0.0001$ .  
 (D) ROC curve analysis showing expression levels of *ASCL1* or *NEUROG2* as predictors of iNeuron quality. The area under the ROC curve (AUC) for *ASCL1* is 0.973, and for *NEUROG2* it is 0.964. There is no statistically significant difference between *ASCL1* and *NEUROG2*.  
 (E) *ASCL1* TPM cutoff of 110 in iNeurons with 100% sensitivity and 3.5% false positive rate (FPR).  
 (F) Correlation between *ASCL1* qPCR and TPM of iNeurons. *ASCL1* qPCR result is normalized to *GAPDH*.  $R^2 = 0.972$ ,  $p < 0.001$ .  
 (G) A representative genome-wide copy number analysis plot assessing post-induction genomic stability. RNA-based CNV calling revealed no aneuploidies or large copy number variations (CNVs) in this iNeuron sample.  
 (H) The post-induction genomic stability assessments are validated by further WGS analysis. WGS also detected no smaller new CNV events.

iNeuron RNA-seq in genetic diagnosis. This workflow comprises two checkpoints (Figure 1B). The first checkpoint occurs during the intermediate stage, where samples from an additional well of 12-well plate can be subject to qPCR for *ASCL1*. This allows for the exclusion of samples with insufficient quality in initial transdifferentiation (likely reflecting efficiency of infection). The second checkpoint can be initiated during the RNA-seq data analysis before clinical interpretation. At this point the iN\_Score can be calculated to ensure transdifferentiation quality. Additionally, CNV analysis is performed on the RNA-seq data to alert

for unwanted culture-related genomic alterations. Overall, this rigorous QC workflow will be instrumental for clinical diagnostic laboratories considering the implementation of iNeuron RNA-seq.

### iNeuron RNA-seq increased the molecular diagnostic yield

We performed a transcriptome-driven analysis based on the iNeuron RNA-seq data. Following the identification of candidate expression findings, we sought DNA variant-level validation from the WGS/ES. Independently, DNA-directed

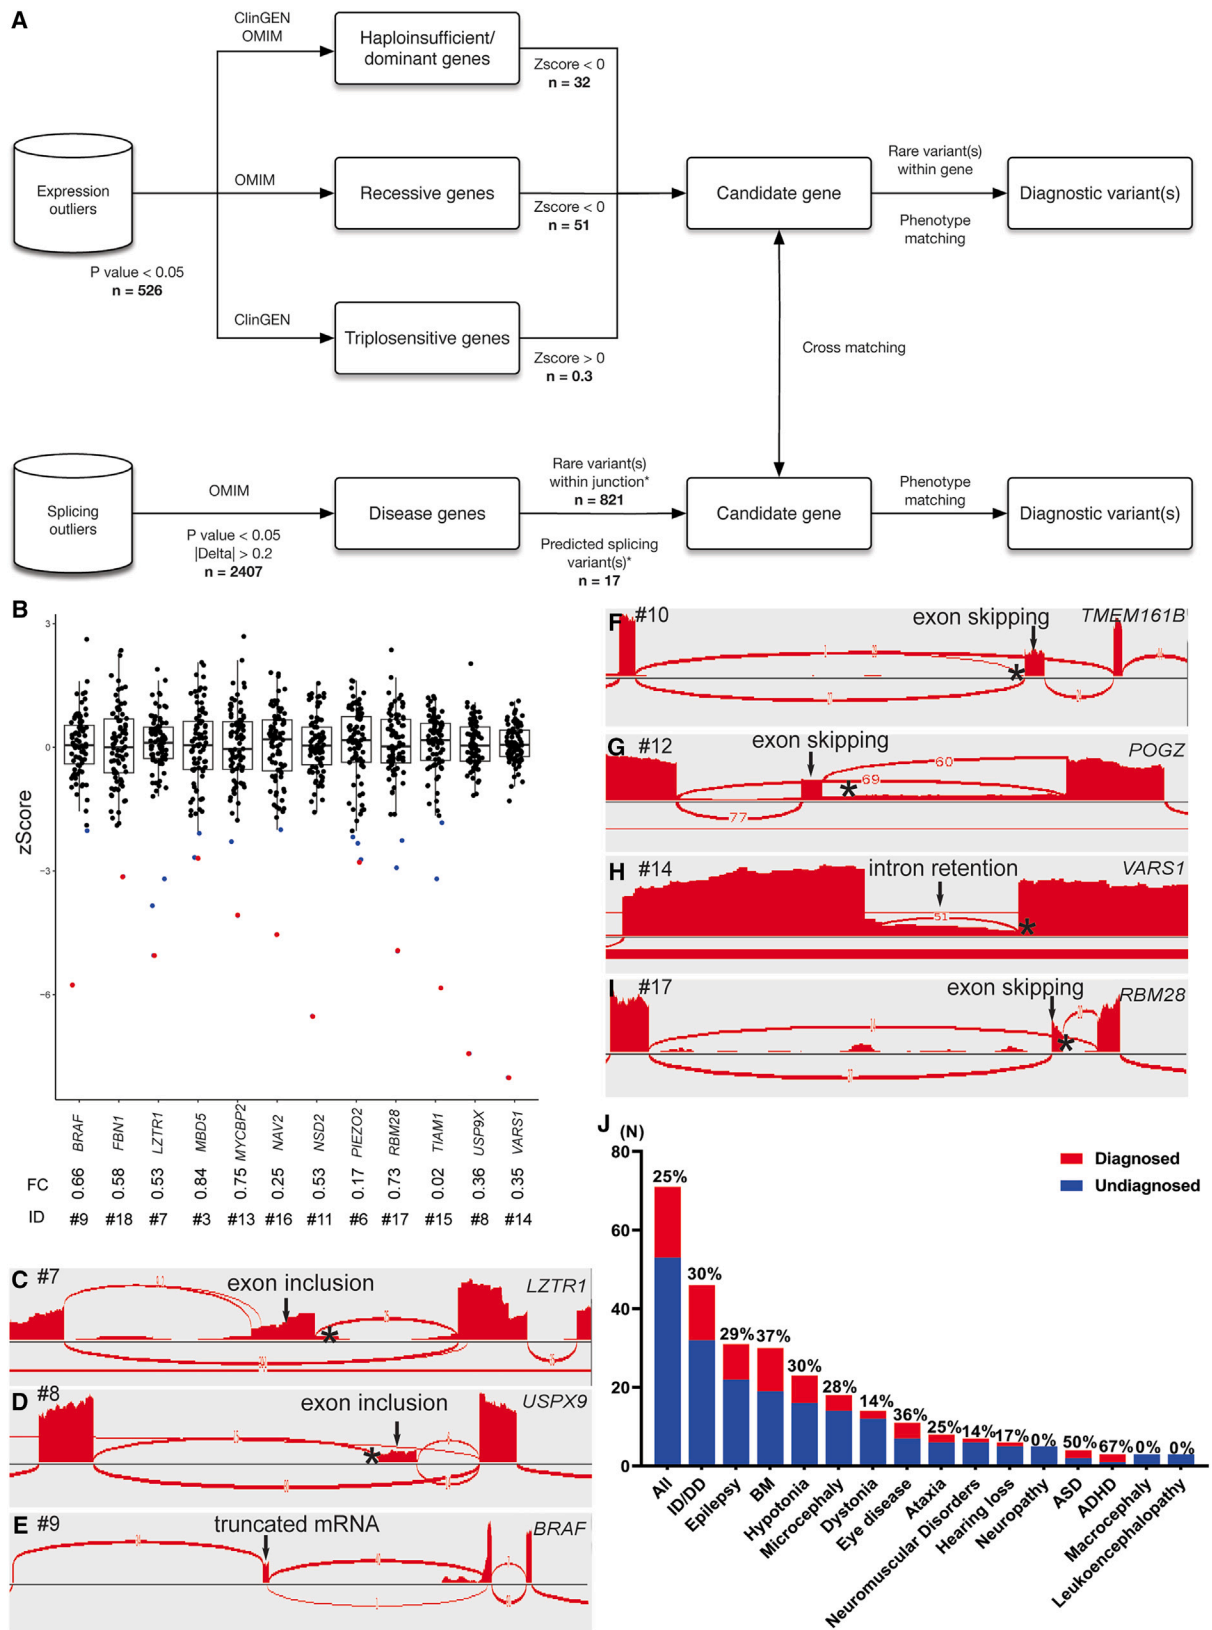

**Figure 3. The interpretation pipeline, molecular diagnostic rates, and selected diagnostic findings from the iNeuron RNA-seq workflow**

(A) Analytical and interpretation pipelines used in iNeuron RNA-seq analysis. The n values indicate the average number of variants passing filtration at each step.

(legend continued on next page)

data analysis was performed as previously described<sup>1,50</sup> to inform and complement the RNA-based analysis.

The transcriptome-driven analysis relies on intra-cohort data normalization under the assumption that samples within this cohort exhibit a high degree of genetic heterogeneity, i.e., each iNeuron sample is expected to have a unique genetic defect and thus can serve as a “control” for the rest of the samples. iNeuron is a novel sample type not represented in public databases such as GTEx. Therefore, we accumulated data from 82 specimens to power the identification of outlier events. We adopted the DROP pipeline<sup>39,51,52</sup> to streamline the identification of expression and splicing outliers. A relatively permissive threshold in the DROP pipeline was used (OUTRIDER:  $p < 0.05$ ; FRASER:  $p < 0.05$ ; Delta  $> 0.2$ ) to allow a broader detection of potential outliers. On average, this method resulted in 526 expression outliers and 2,407 splicing outliers for each sample (Figures 3A and S6A). After limiting the analysis to known disease-associated genes in ClinGen and OMIM, we stratified and prioritized the expression outliers by matching the direction of the expression change with the expected disease mechanism, namely decreased expression ( $Z < 0$ ) for findings in genes with a haploinsufficiency/autosomal-dominant mechanism or autosomal-recessive inheritance and increased expression ( $Z > 0$ ) for genes with a triplosensitive disease mechanism. The resultant per sample aberrant event counts averaged at 32 for dominant trait genes and 51 for recessive trait genes (Figures 3A and S6B). Splicing outliers are similarly limited to those affecting OMIM disease-associated genes. We required that the abnormal splicing be substantiated by a DNA variant within 1 kb of the splicing junction based on the ES/WGS data (except for the *TIAM1* change discussed later). On average, each sample had 821 splicing outlier-DNA variant pairs in OMIM disease-associated genes, 17 of which are supported by SpliceAI (score  $> 0.2$ ) (Figures 3A and S6C). Finally, by cross-referencing the candidate genes identified by OUTRIDER and FRASER and their correlation with the proband’s clinical phenotypes, we narrowed the findings down to the candidate diagnostic variants (Figure 3A). The candidate variants are manually reviewed for a final decision of their classifications.

OUTRIDER identified 12 aberrant expression levels involving the genes *BRAF* (MIM: 164757), *FBN1* (MIM: 134797), *LZTR1* (MIM: 600574), *MBD5* (MIM: 611472), *MYCBP2* (MIM: 610392), *NAV2* (MIM: 607026)<sup>53</sup>, *NSD2* (MIM: 602952), *PIEZO2* (MIM: 613629), *RBM28* (MIM: 612074), *TIAM1* (MIM: 600687), *USP9X* (MIM: 300072),

and *VARSI* (MIM: 192150), with fold changes ranging from 0.02 to 0.84 (median 0.53), as shown in Figure 3B. All the above expression outliers can be associated with a causal DNA variant (Table 3) except for the almost diminished *TIAM1* expression outlier in proband #15. Although the DNA changes in this gene cannot be confidently linked to the expression reduction, this *TIAM1* expression change is considered a possible diagnostic finding because of its good disease-proband phenotype matching and the distinctive reduction in expression level ( $Z$  score =  $-5.83$ ).

RNA-seq analyses revealed 10 aberrant splicing events involving *ITPR1* (MIM: 147265), *DCX* (MIM: 300121), *MBD5*, *LZTR1* (Figures 3C and S7A), *USP9X* (Figures 3D and S7B), *BRAF* (Figure 3E), *TMEM161B* (Figures 3F and S7C), *POGZ* (MIM: 614787) (Figures 3G and S8A), *VARSI* (Figures 3H and S8B), and *RBM28* (Figures 3I and S8C) (see further details of *ITPR1*, *DCX*, and *MBD5* below). Notably, the DNA-directed analysis revealed 5 aberrant splicing events predicted by SpliceAI that were not detected by FRASER. Three of the missed variants were explained by a low abundance of the abnormal transcript, which is possibly caused by degradation from nonsense-mediated decay (NMD) and/or the leakiness of the splice variant (i.e., *POLR3A* [MIM: 614258] and *FBN1*, Figure S9). In addition, misalignment (as well as NMD) contributed to one event (*PIEZO2*) being missed by the DROP pipeline, in which sequencing reads supporting the abnormal splice acceptor site were misaligned into the normal splice acceptor site plus an adjacent indel (Figure S10). In total, 12 aberrant expression and 13 aberrant splicing events contributed to the final molecular diagnoses of the participants (Table 3).

The application of the RNA-directed and the DNA-complemented analysis approach assisted in the genetic diagnosis of 18 in probands presenting with various neurological disorders that were enrolled in the UDN, accounting for 25.4% of the total cohort (Figure 3J). The diagnostic findings included four with aberrant expression, five with aberrant splicing, and eight with both aberrant expression and splicing. Furthermore, one participant (*CACNA1A* [MIM: 601011]) displayed an unbalanced expression of a heterozygous missense variant allele, potentially indicating the presence of another modifying variant that requires confirmation through WGS. The variant types and inheritance for the diagnostic findings include seven *de novo* variants, seven sets of compound heterozygous variants, and five variants inherited from a parent or of unknown inheritance (Table 3). Notably, the *de novo* translocation resulted in a truncated *BRAF* protein

---

(B) OUTRIDER identified 12 aberrant expression outliers as diagnostic findings (*BRAF*, *FBN1*, *LZTR1*, *MBD5*, *MYCBP2*, *NAV2*, *NSD2*, *PIEZO2*, *RBM28*, *TIAM1*, *USP9X*, and *VARSI*). Each dot represents an individual participant. The blue dots represent expression outliers that fulfill the analytical filtration standards defined in (A). The red dots represent molecular diagnostic findings with integrated considerations from analytical filtrations (blue dots), phenotypic matching, and correlation with DNA variant findings. For each molecular diagnostic expression outlier (red dot), its ID and expression fold change compared to controls are listed underneath.

(C–I) FRASER detected 10 aberrant splicing events, with 7 representative events (*LZTR1*, *USP9X*, *BRAF*, *TMEM161B*, *POGZ*, *VARSI*, and *RBM28*) illustrated here. Aberrant junctions are shown in the Sashimi plot. The asterisk represents the position of the causal variant.

(J) Molecular diagnostic yields in individuals with different neurological phenotypes.

**Table 3. Molecular diagnostic findings from iNeurons RNA-seq**

| ID | Sex | Age      | Gene           | Isoform        | Variant DNA                                            | Zygoty | Inheritance    | Variant RNA                                                     | RNA consequence                                                                                                        | Detection algorithm <sup>a</sup>       | TPM iNeuron median | TPM fibroblast median | iN required? <sup>b</sup> |
|----|-----|----------|----------------|----------------|--------------------------------------------------------|--------|----------------|-----------------------------------------------------------------|------------------------------------------------------------------------------------------------------------------------|----------------------------------------|--------------------|-----------------------|---------------------------|
| 1  | M   | 4 years  | <i>ITPR1</i>   | NM_001378452.1 | c.5980-17G>A                                           | het    | <i>de novo</i> | r.5979_5980ins [5980-15_5980-1/5979+1_5980-18,a,5980-16_5980-1] | two events: 15 nt intron inclusion at splice acceptor; entire intron inclusion                                         | AS                                     | 6.03               | 1.16                  | yes                       |
| 2  | M   | 22 years | <i>DCX</i>     | NM_001195553.2 | c.946+4588G>T                                          | hem    | <i>de novo</i> | r.946_947ins[946+4619_947-1]                                    | 13,549 nt intron inclusion at splice acceptor                                                                          | AS                                     | 2.31               | 0                     | yes                       |
| 3  | F   | 4 years  | <i>MBD5</i>    | NM_001378120.1 | c.-925+35307_-557+13765del chr2:148056991_148356101del | het    | maternal       | r.-924_-558del                                                  | 5' UTR exons 2-4 deletion containing 337 nt                                                                            | AE (0.84), AS                          | 3.32               | 2.99                  | yes                       |
| 4  | F   | 7 years  | <i>CACNA1A</i> | NM_001127222.2 | c.5015G>C                                              | het    | <i>de novo</i> | r.5015g>c (r.632_784del)                                        | skewed variant allele expression at 88% fraction; skipping of exon 5 (153 nt); uncertain if the two events are related | MAE; AS                                | 6.48               | 2.54                  | yes                       |
| 5  | M   | 36 years | <i>POLR3A</i>  | NM_007055.4    | c.1771-7C>G                                            | het    | paternal       | r.1771_1909del/1643_1909del                                     | two events: skipping of exon 14 (139 nt); skipping of exons 13-14 (267 nt)                                             | AS (moderate effect)                   | 13.92              | 10.76                 | no                        |
|    |     |          |                |                | c.3892-297_3892-221del                                 | het    | maternal       | r.3891_3892ins [3892-1_3892-227/3892-74_3892-227]               | two events: 227 nt intron inclusion at splice acceptor; 154 nt cryptic exon inclusion from intron 29                   | AS (moderate effect)                   |                    |                       |                           |
| 6  | F   | 5 years  | <i>PIEZO2</i>  | NM_001378183.1 | c.5257-1G>A                                            | het    | maternal       | r.5258del                                                       | 1 nt shift of splice acceptor                                                                                          | AE (0.17), AS (misalignment, NMD), MAE | 4.56               | 2.14                  | yes                       |
|    |     |          |                |                | c.1528-1G>A                                            | het    | paternal       | r.1528del                                                       | 1 nt shift of splice acceptor                                                                                          | AE (0.17), AS (misalignment, NMD), MAE |                    |                       |                           |
| 7  | M   | 2 years  | <i>LZTR1</i>   | NM_006767.4    | c.2178C>A                                              | het    | paternal       | r.2178c>a                                                       | nonsense                                                                                                               | not applicable                         | 25.41              | 36.41                 | no                        |
|    |     |          |                |                | c.1943-256C>T                                          | het    | maternal       | r.1942_1943ins[1942+342_1943-262/1942+360_1943-262]             | two events: 117 nt cryptic exon inclusion; 99 nt cryptic exon inclusion                                                | AE (0.53), AS                          |                    |                       |                           |

(Continued on next page)

Table 3. Continued

| ID | Sex | Age      | Gene            | Isoform        | Variant DNA                                                                                                                                                            | Zygoty | Inheritance    | Variant RNA                                                  | RNA consequence                                                                                                                                                                                                            | Detection algorithm <sup>a</sup>       | TPM iNeuron median | TPM fibroblast median | iN required? <sup>b</sup> |
|----|-----|----------|-----------------|----------------|------------------------------------------------------------------------------------------------------------------------------------------------------------------------|--------|----------------|--------------------------------------------------------------|----------------------------------------------------------------------------------------------------------------------------------------------------------------------------------------------------------------------------|----------------------------------------|--------------------|-----------------------|---------------------------|
| 8  | F   | 4 years  | <i>USP9X</i>    | NM_001039591.3 | c.1315–284G>T                                                                                                                                                          | mosaic | <i>de novo</i> | r.1314_1315ins [1315–281_1315–176/1315–281_1315–172]         | two events: 106 nt or 110 nt cryptic exon inclusion                                                                                                                                                                        | AE (0.36), AS                          | 43.08              | 42.06                 | no                        |
| 9  | F   | 16 years | <i>BRAF</i>     | NM_001374258.1 | seq[GRCh38] t(5; 7) (q31.3; q34) NC_000005.10:g.140964619_qterdelins[NC_000007.14:g.140799141_qter] NC_000007.14:g.140799137_qterdelins[NC_000005.10:g.140964621_qter] | het    | <i>de novo</i> | r.-226_980:(?)/–226_980:980_981ins[980+1_980+1225]:(?)       | two (or more) events: fusion gene of 5' <i>BRAF</i> with sequence from 7q34; fusion gene of 5' <i>BRAF</i> plus 1225 nt intron retention with sequence from 7q34; the question mark denotes uncertainty of the breakpoints | AE (0.66), AS                          | 6.35               | 5.83                  | no                        |
| 10 | M   | 2 years  | <i>TMEM161B</i> | NM_153354.5    | c.800+5G>A                                                                                                                                                             | het    | maternal       | r.660_800del                                                 | skipping of exon 8 (141 nt)                                                                                                                                                                                                | AS (candidate disease-associated gene) | 5.29               | 4.06                  | no                        |
|    |     |          |                 |                | c.980T>C                                                                                                                                                               | het    | paternal       | r.980u>c                                                     | missense                                                                                                                                                                                                                   | not applicable                         |                    |                       |                           |
| 11 | M   | 26 years | <i>NSD2</i>     | NM_001042424.3 | NC_000004.12:g.1869269_1873124del                                                                                                                                      | het    | unknown        | ( <i>NSD2</i> )x53%                                          | expression reduction of the entire transcript                                                                                                                                                                              | AE (0.53)                              | 7.70               | 13.85                 | no                        |
| 12 | F   | 4 years  | <i>POGZ</i>     | NM_015100.4    | c.2546–20T>A                                                                                                                                                           | het    | <i>de novo</i> | r.2546_2570del/2545_2571ins[2545+1_2546–21,a,2546–19_2571–1] | two events: skipping of exon 18 (25 nt); retention of introns 17–18 (446 nt)                                                                                                                                               | AS                                     | 20.87              | 22.03                 | no                        |
| 13 | M   | 10 years | <i>MYCBP2</i>   | NM_015057.5    | c.8005C>T                                                                                                                                                              | het    | <i>de novo</i> | ( <i>MYCBP2</i> )x75%                                        | stopgain variant likely causes NMD and skewed allele fraction                                                                                                                                                              | AE (0.75), MAE                         | 16.59              | 14.33                 | no                        |
| 14 | F   | 2 years  | <i>VAR1</i>     | NM_006295.3    | c.3288G>T                                                                                                                                                              | het    | paternal       | r.3288delins[u,3288+1_3289–1]                                | entire intron 27 retention (71 nt)                                                                                                                                                                                         | AE (0.35), AS                          | 30.3               | 38.98                 | no                        |
|    |     |          |                 |                | c.2590_2592delAGCinsTGA                                                                                                                                                | het    | maternal       | ( <i>VAR1</i> )x35%                                          | stopgain variant likely causes NMD and skewed allele fraction                                                                                                                                                              | AE (0.35), MAE                         |                    |                       |                           |

(Continued on next page)

**Table 3. Continued**

| ID | Sex | Age      | Gene         | Isoform        | Variant DNA                                         | Zygoty     | Inheritance          | Variant RNA                            | RNA consequence                                                                                                               | Detection algorithm <sup>a</sup>              | TPM iNeuron median | TPM fibroblast median | iN required? <sup>b</sup> |
|----|-----|----------|--------------|----------------|-----------------------------------------------------|------------|----------------------|----------------------------------------|-------------------------------------------------------------------------------------------------------------------------------|-----------------------------------------------|--------------------|-----------------------|---------------------------|
| 15 | F   | 10 years | <i>TIAM1</i> | NM_001353694.2 | c.1996–78G>A,<br>c.1585–5707G>T,<br>c.–188–13607G>A | het        | unknown              | ( <i>TIAM1</i> )x2%                    | expression reduction of the entire transcript                                                                                 | AE (0.02)                                     | 2.63               | 2.55                  | no                        |
| 16 | F   | 3 years  | <i>NAV2</i>  | NM_145117.5    | c.5011_5012del<br>c.6580del                         | het<br>het | maternal<br>paternal | ( <i>NAV2</i> )x25%                    | frameshift variants likely cause NMD                                                                                          | AE (0.25)                                     | 3.04               | 8.67                  | no                        |
| 17 | M   | 2 years  | <i>RBM28</i> | NM_018077.3    | c.1745G>A<br>c.1489_1492dup                         | het<br>het | maternal<br>paternal | r.1714_1788del<br>( <i>RBM28</i> )x73% | variant likely destroys exon splicing enhancer and cause skipping of exon 16 (75 nt)<br>frameshift variants likely causes NMD | AE(0.73), AS<br>AE(0.73), MAE                 | 5.26               | 5.37                  | no                        |
| 18 | F   | 9 years  | <i>FBN1</i>  | NM_000138.5    | c.248–151A>G                                        | het        | paternal             | r.247_248ins[248–282_248–152]          | inclusion of cryptic exon (131 nt) with premature stop codon likely causing NMD                                               | AE (0.58), AS (low abundance due to NMD), MAE | 524.4              | 517.6                 | no                        |

Abbreviations: AE, abnormal expression; AS, abnormal splicing; MAE, mono-allelic expression; NMD, nonsense-mediated decay.

The reduction of *TIAM1* expression is considered as a possible molecular diagnosis with weaker evidence compared to all other variants in this table. This is because of a lack of the matching DNA variant underlying the expression change. Three rare variants in *TIAM1* are listed. However, their causal relationship with the expression reduction is uncertain.

The *FBN1* variant is considered as a partial molecular diagnosis, which may partly explain the Marfanoid phenotype in this individual, but not the neurological phenotypes.

The *POLR3A* variants are considered as a possible molecular diagnosis because of the atypical phenotypic match.

*TMEM161B*<sup>54</sup> and *MYCBP2*<sup>55</sup> are recently identified disease-associated genes not included in disease-associated gene databases such as OMIM at the time of the analysis. Therefore, the findings in these two individuals are considered investigational.

The phenotypes of each proband are summarized as Human Phenotype Ontology (HPO) terms (Data S2).

<sup>a</sup>Content in parentheses following AE indicates the expression fold change in this individual; the content in parentheses following AS indicates that the splicing event escaped detection from the analysis pipeline but was rescued by manual analysis with special considerations.

<sup>b</sup>The iNeuron process is required to activate the gene or isoform of interest to facilitate variant interpretation.

lacking the kinase domain, and the protocadherin-alpha gene cluster on chromosome 5 was also identified as a possible candidate for further study (Figure S11).

Neuron induction is required for the identification of the molecular diagnoses in 27.7% (5/18) of probands, with four individuals benefiting from activations of the expression of neuronal genes, while one from the activation of a neuron-specific isoform (Table 3). This methodology demonstrated a range of diagnostic rates in individuals with various neurological phenotypes. There was a notably enhanced molecular diagnostic yield in individuals with brain malformation (37%, 11/30), intellectual disability (30%, 14/46), and epilepsy (29%, 9/31); other less represented phenotypic groups on their list of phenotypes include ADHD (67%, 2/3), autism spectrum disorder (ASD; 50%, 2/4), eye diseases (36%, 4/11), and hypotonia (30%, 7/23) (Figure 3J).

### Molecular diagnoses achieved through iNeuron RNA-seq by activation of neurological disease-associated genes

iNeuron RNA-seq conferred a significant advantage in enhancing the expression of OMIM-N genes, confirming the molecular diagnoses in five probands. In subject #1, FRASER analysis identified aberrant splicing in *ITPR1* in a 4-year-old male with a history of congenital iris hypoplasia, delays in gross motor development, hypotonia, ataxia, and mild dysmorphic features. TrioGS analysis confirmed a novel *de novo* heterozygous intronic variant in *ITPR1* (GenBank: NM\_001378452.1; c.5980–17G>A), which is predicted to have a moderate impact on splicing (SpliceAI score 0.57) (Figure 4A). *ITPR1* is not well expressed in fibroblasts; RNA-seq on fibroblasts has previously been attempted but yielded inconclusive results due to the low expression of *ITPR1*.<sup>56</sup> Upon neuron induction, the expression of *ITPR1* increased 12-fold (Figures 4B and S12A), allowing for a high-confidence detection of the 15-nucleotide retention from intron 45 in approximately 50% of the reads (Figures 4C, 4D, and S12A). The result of the 15-nucleotide retention is consistent with that obtained previously by targeted PCR amplification and Sanger sequencing from the cDNA.<sup>56</sup> Notably, retention of the entire intron 45 was observed at a low level in the proband iNeuron RNA-seq data (Figure 4C), which is a finding that has not been previously observed from the fibroblast RNA results. Defects in *ITPR1* cause Gillespie syndrome (MIM: 206700) with either autosomal-dominant or autosomal-recessive inheritance, through distinct molecular mechanisms. The c.5980–17G>A variant was presumed to have a dominant-negative effect on *ITPR1* channel function, leading to the autosomal dominant form of Gillespie syndrome.<sup>56–58</sup> This assumption was made because (1) the variant is *de novo* and (2) no additional rare variants were found using our analysis pipeline in the DNA sequencing data that can contribute to a bi-allelic model. The precise RNA-level splicing consequences provided by iNeuron RNA-seq enable further potential investigations into the molecular mechanism and disease inheritance of the *ITPR1* defect in this family, which is required for downstream

studies if the family were interested in pursuing molecular therapies such as antisense oligonucleotide therapy.

iNeuron RNA-seq also enables the detection of defects in neurological genes not expressed in fibroblasts. In subject #2, FRASER detected an aberrant splicing event in *DCX*, a neuron-specific gene that plays essential roles in neuronal migration and establishment of the six-layer organization in the cerebral cortex.<sup>59–61</sup> This 23-year-old male presented with a history of intellectual disability, epilepsy, and cortical malformation. Analysis of whole blood WGS data revealed a novel *de novo* deep intronic variant (GenBank: NM\_001195553.2; c.946+4588G>T) (Figure 4E). Defects in *DCX* have been associated with neuronal migration disorders, lissencephaly, X-linked (MIM: 300067). Males with *DCX*-related lissencephaly typically have profound intellectual disabilities, developmental delay, epileptic seizures, and cerebral palsy.<sup>62,63</sup> SpliceAI suggested a possible splicing effect of the c.946+4588G>T variant but with a low score of 0.11, which is considered uninformative and would result in the variant being filtered out in most DNA-based analysis pipelines. RNA-seq analysis is warranted to clarify the splicing consequence and thus the clinical significance of the deep intronic variant. However, *DCX* is not expressed in fibroblasts (Figures 4F and S12B). iNeuron RNA-seq was performed, which resulted in sufficient detection of *DCX* expression. RNA-seq uncovered retention of 13,549 nt intronic sequences, located at –31 bp from the intronic variant, which is expected to create an out-of-frame cryptic exon and lead to a frameshift consequence (Figures 4G, 4H, and S12B). The RNA-seq data serve as key supporting evidence to classify the c.946+4588G>T variant as likely pathogenic. Unexpectedly, from the mother's iNeurons RNA-seq data, we observed a small number of abnormal junction reads. Re-inspection of the WGS data from her whole blood showed no abnormal reads at 64× coverage. The discrepancy led us to suspect potential tissue-limited mosaicism that manifests in the mother's fibroblast. We performed amplicon-based next-generation sequencing on the mother's fibroblast. The result revealed a variant at 29% fraction in DNA from fibroblasts and 2% in DNA from blood, implicating that the family is at risk for gonadal mosaicism for the likely pathogenic *DCX* variant (Figure S13).

iNeuron RNA-seq revealed an event of allele-specific expression, contributing to a more comprehensive understanding of the molecular disease mechanisms. Proband #4 is a 7-year-old female presenting with severe ataxia, progressive cerebellar hypoplasia, hypotonia, and global developmental delays. ES analysis revealed a *de novo* heterozygous missense variant in *CACNA1A* (GenBank: NM\_001127222.2; c.5015G>C [p.Arg1672Pro]), which is considered to be causative because of the broad phenotypic match. However, this participant was considered to be on the most severe end of the clinical spectrum for *CACNA1A*-related disorders, especially when compared to a series of other individuals with similar *de novo* missense *CACNA1A* variants; furthermore, this participant did not respond to acetazolamide treatment, which is effective in

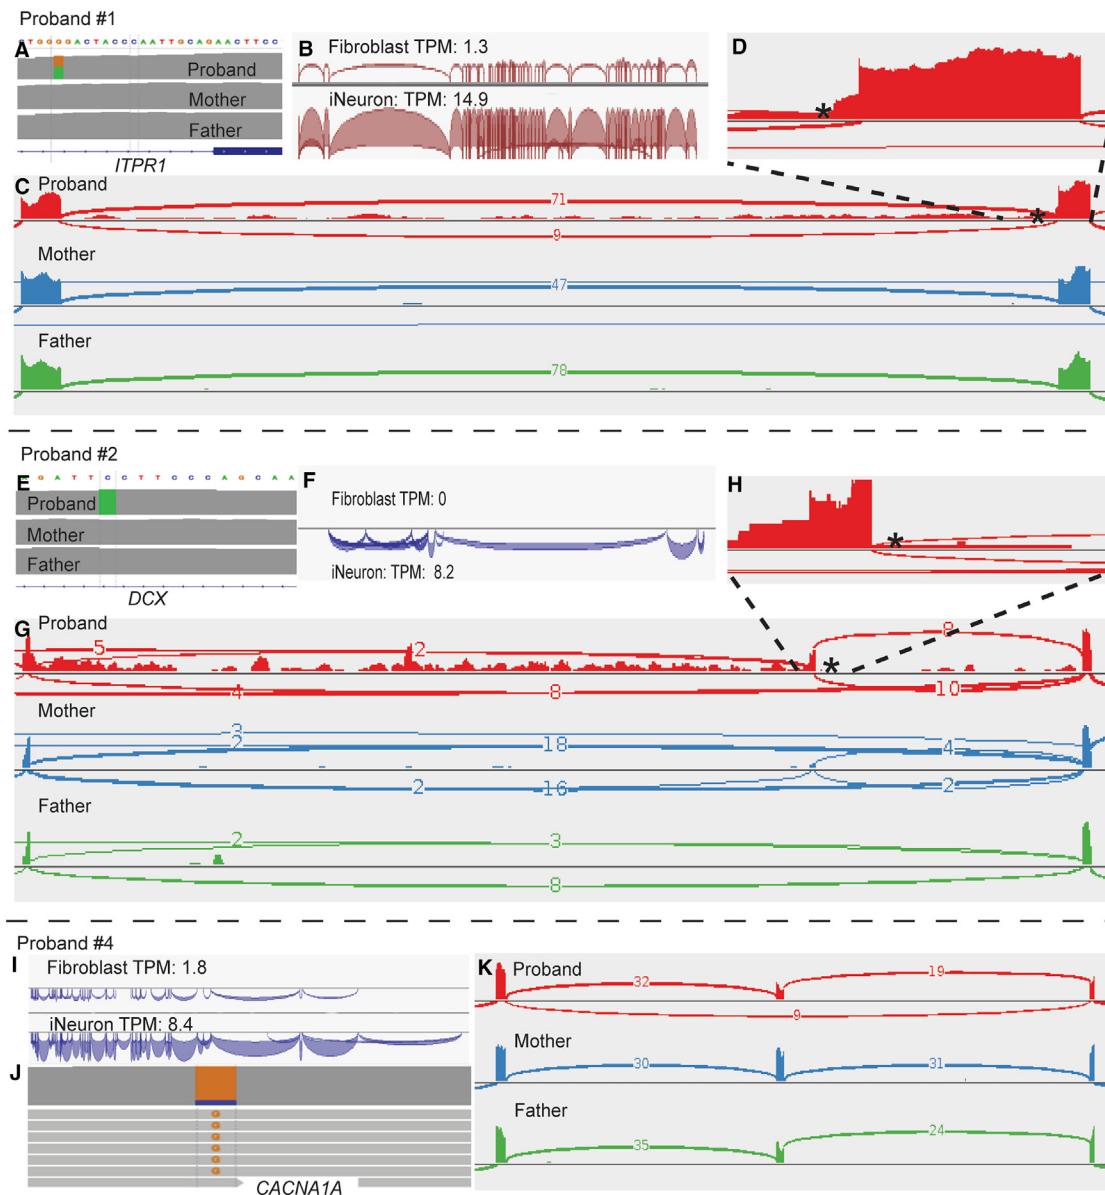

**Figure 4. Molecular diagnoses achieved by iNeuron RNA-seq through elevated expression of OMIM-N genes**

- (A) Trio WGS reveals a *de novo* heterozygous intronic variant in *ITPR1* (GenBank: NM\_001378452.1; c.5980–17G>A).  
 (B) Significant increase in expression of *ITPR1* after transdifferentiation.  
 (C) iNeuron RNA-seq demonstrates a 15-nucleotide retention from intron 45 in approximately 50% of the reads, as well as complete intron 45 retention in a small fraction of reads.  
 (D) Zoomed in view of the 15-nucleotide retention.  
 (E) Trio WGS identifies a novel hemizygous deep intronic variant (GenBank: NM\_001195553.2; c.946+4588G>T) in *DCX*.  
 (F) *DCX* is not expressed in fibroblasts but is activated in iNeurons.  
 (G) Sashimi plot displays inclusion of a 13,549 bp cryptic exon from intron, positioned –31 bp from the intronic variant of *DCX*.  
 (H) Zoomed-in view of the new splice junction at the intron retention.  
 (I) Significant increase in expression of *CACNA1A* after transdifferentiation.  
 (J) Skewed expression of the variant allele in *CACNA1A*.  
 (K) Sashimi plot reveals exon skipping located 124 kb away from the missense variant. Variants are indicated by asterisks.

therapy to other individuals with *CACNA1A* defects.<sup>64–66</sup> Functional studies performed in a fly model gleaned insights into the molecular pathology mechanisms on a protein level, suggesting a gain-of-function mechanism.<sup>64</sup>

RNA-seq analysis from individual-derived cell lines is needed to provide a perspective of the disease presentation mechanism from a transcriptional level. Fibroblast-derived

RNA-seq data were deemed uninformative due to the low expression of *CACNA1A* (TPM = 1.8) (Figure 4I). The TPM of *CACNA1A* was boosted to 8.4 in iNeurons. RNA-seq on the iNeurons showed an unexpected skewed variant fraction of 88% for the c.5015G>C variant, indicating an overexpression of the variant allele or a reduced expression of the reference allele (Figures 4J and S12C). Intriguingly, an exon



skipping located 124 kb away from the missense variant was identified by FRASER (Figures 4K and S12D). The skipped exon cannot be phased with the missense variant based on the current short-read data, but the combined observations warrant additional investigations to pinpoint to potential *cis* or *trans* modifiers that modulate the disease phenotype variability and therapy response.

### Activation of neuron-specific isoforms increases the molecular diagnostic yield

When evaluating the expression of a gene in a tissue or a sample, most current researchers typically calculate the TPM value on a gene level, rather than breaking it down into isoform-level values. In the GTEx portal, the gene-level TPMs are computed from RNA-Seq, which uses an artificial collapsed transcript as the gene basis of the calculation. When a tissue-specific isoform is critical for disease pathogenesis but differs little from other ubiquitous isoforms, the presence or absence of a tissue-specific transcript can be unintentionally masked if the gene-level TPM is used in the analysis.

We hypothesize that the iNeuron RNA-seq platform provides an advantage over fibroblast analysis by enhancing neuron-specific isoform expressions. Given the challenges in accurately reconstructing full-length isoforms from our short-read RNA-seq data, we limited the analysis to tissue-specific isoforms that are tagged by tissue-specific exons, i.e., a tissue-specific isoform encompassing one or more exons that are differentially expressed compared to other exons in that tissue (Figure 5A). Comparative analysis of our iNeuron and fibroblast data pools revealed 41,473 neuron-enriched exons from 11,420 genes. Notably, we found that 62.1% (1,690/2,721) of the OMIM-N genes had at least one activated exon-tagged isoform, totaling 9,356 exons (Figure 5B), with a median of 3 exons per gene. About three-quarters (74.3%) of these identified genes contained 1–5 neuron-enriched exons (Figure 5C). Furthermore, we identified 936 neuron-specific exons (from 563 genes) from the neuron-enriched OMIM-N genes (Figure 5B, Data S3). These exons demonstrated low expression in fibroblasts but were activated following neuron induction, highlighting the exclusive detection of these exons and associated junctions in iNeurons. For example, although fibroblasts have higher *CAMTA1* (MIM: 611501) TPM values than iNeurons on the *gene* level (5.25 and 2.64 respectively), *exon* level expression analysis reveals that multiple neuron-specific exons are successfully activated in our iNeuron data for *CAMTA1* (Figure 5D). These exons are exclusively expressed in the brain, as evidenced by GTEx data (Figure 5E). Activation of these exons is critical for disease-oriented analysis, as demonstrated by the clustering of clinically relevant variants reported on ClinVar (Figure 5F). The capability to activate neuron-specific isoforms positions iNeurons as a valuable diagnostic tool for previously unresolved challenging cases.

In our cohort, a molecular diagnosis was achieved in *MBD5* leveraging the detection of the neuron-specific isoform from the iNeuron data; interpretations using the fibroblast RNA-Seq alone would have resulted in a potentially misleading

conclusion. Subject #3 is a 4-year-old girl with seizures, abnormal brain MRI results, dysmorphic features, unusual metabolic profiles, and multiple members on the maternal side of the family with behavioral issues. WGS revealed a maternally inherited heterozygous deletion of exons 2–4 (NM\_001378120.1) within the 5' UTR region of *MBD5* (Figures 5G and 5H). Haploinsufficiency of *MBD5* has been linked to neurodevelopmental disorders characterized by intellectual disability, developmental delay, seizures, and abnormal behavioral features (Intellectual developmental disorder, autosomal dominant 1 [MIM: 156200]).<sup>67–69</sup> However, the consequence of this noncoding deletion is unclear. RNA-Seq was performed on the proband fibroblasts. While *MBD5* is expressed at an adequate level in fibroblasts (TPM = 8.98), we did not detect any gross expression change or abnormal junctions. The absence of gross expression change suggests that the deletion has either no effect or a mild effect on the transcription of *MBD5*. The apparent lack of abnormal junctions conflicted with the presence of the deletion, leading to confusions in the overall data interpretation.

Analysis of *MBD5* expression data on GTEx revealed that a long isoform predominates in human brains, whereas several shorter isoforms constitute the expression of *MBD5* in cultured fibroblasts (Figure S14). Only when an isoform is long enough to span over the deletion are the abnormal junctions expected to be formed. As such, we predict that (1) the different compositions of isoforms in neurons versus fibroblasts result in different shortened transcripts caused by the deletion, and (2) it is likely more meaningful to study the impact on the long neuronal isoform to evaluate the clinical significance of the deletion. We analyzed the iNeuron RNA-Seq from our cohort and identified 12 neuron-enriched exons in *MBD5*, which is consistent with expectations from the GTEx neuronal isoform (ENST00000407073.5) and suggests activation of the desired transcript in iNeurons (Figure S14). After neuronal induction, the abnormal junctions representing the deletion can now be detected in Subject #3 by FRASER. An abnormal expression of *MBD5* is also detected by OUTRIDER, with a moderate fold change at 0.84 (Figure 3B). Leveraging the fact that iNeurons have the long neuronal isoform encompassing the deletion, we can phase the transcripts to the allele with deletion and the other allele without, which facilitates expression quantification on the specific allele with deletion (Figure 5G). Phasing the reads can help estimating the expression change specific to the deletion allele. By comparing the read counts from the two alleles with each other, we noted that the maternal allele with the deletion [30 junction reads (red circle)] has reduced expression compared to the paternal allele without the deletion [59 junction reads (blue circle)] (Figures 5G–5I). This implicates that the 5'UTR deletion possibly led to a mild expression decrease of *MBD5*. Taken together, the activation of a neuron-specific isoform in Subject #3 resolved misleading negative data from fibroblast RNA-Seq, contextualized disease mechanism interpretation with tissue-appropriate isoforms, and provided an allele-specific strategy to quantify the mild expression reduction.

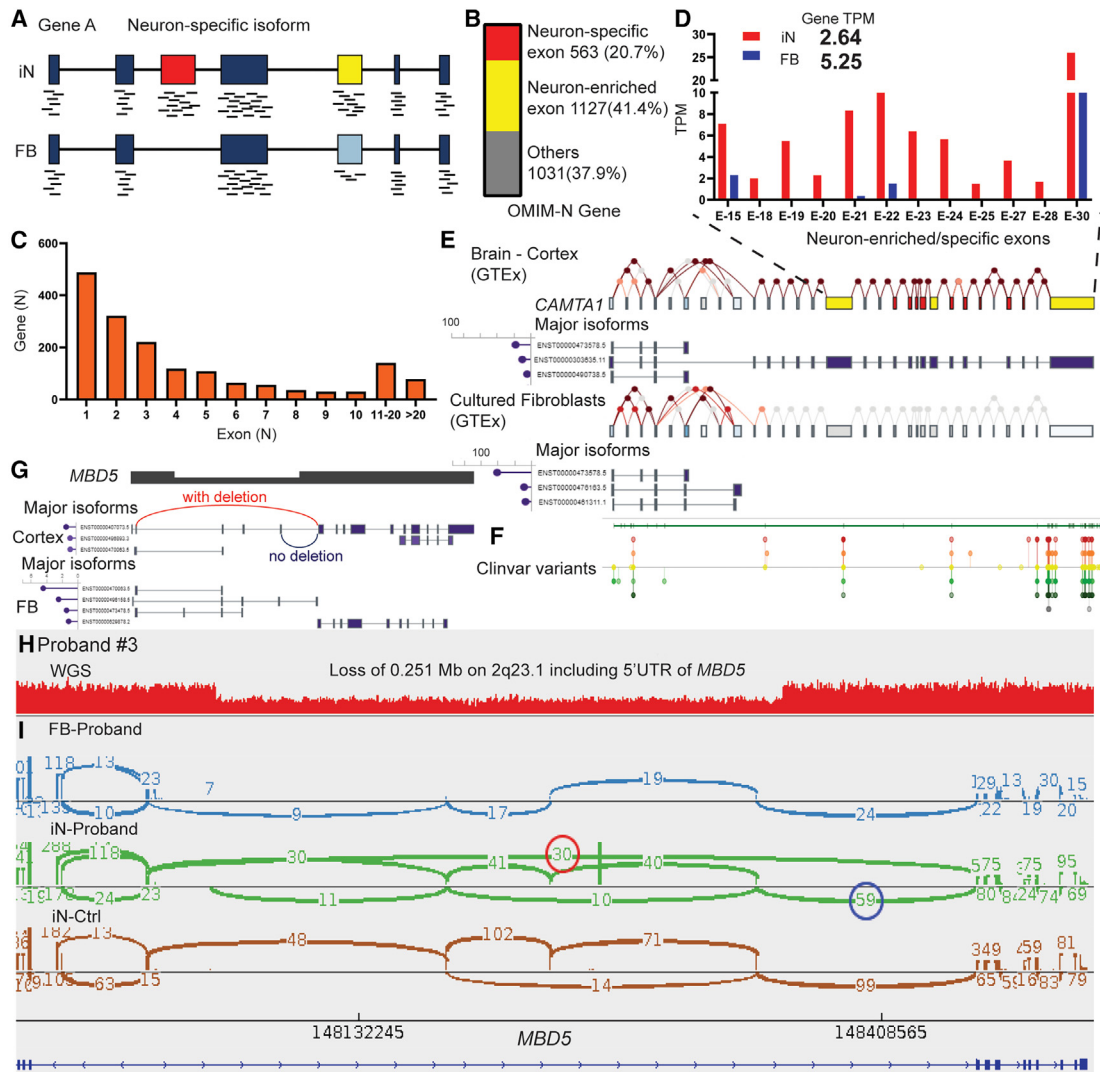

**Figure 5. Enhanced molecular diagnosis with iNeuron RNA-seq through detection of neuron-enriched exons**

(A) Schematic diagram illustrating that neuron-enriched and/or neuron-specific isoforms can be detected in iNeurons. (B) Identification from iNeuron RNA-seq of 9,356 neuron-enriched exons (from 1,690 OMIM-N genes), including 936 neuron-specific exons (from 563 OMIM-N genes). The term “other” refers to the remaining OMIM-N genes that do not include neuron-enriched exons. (C) Distribution of OMIM-N genes based on the number of neuron-enriched exons when comparing iNeurons with fibroblasts. (D–F) The neuron-specific isoform in *CAMTA1* is detected by iNeuron RNA-seq. The expected distribution of neuron- and fibroblast-specific isoforms are illustrated in (E) based on data from GTEx. Multiple exons toward the end of the transcript are shown to be highly enriched (yellow) or specific (red) to neurons. Interrogation of these exons in the neuronal isoform is important as illustrated by the distribution of clinically relevant variants from ClinVar in (F). Exon-level RNA-seq data from iNeurons, summarized in (D), demonstrate successful activation of the neuron-enriched and neuron-specific exons. Note that gene-level TPM (2.64 for iNeurons and 5.25 for fibroblasts) can disguise the activation of tissue-specific isoforms. (G) Schematic showing the aberrant junction (red) caused by the 5' UTR deletion of *MBD5*, which can be detected only in the neuron-specific long isoform. The alternative junction (blue) corresponds to the normal allele with no deletion. (H) Detection of a heterozygous deletion (0.25 Mb) on 2q23.1, involving noncoding exons of *MBD5* through WGS. (I) Sashimi plot depicting the presence of abnormal junctions (red circle) exclusively in proband's iNeurons, but not in fibroblasts. The number of junction reads in the red and the blue circles represent abundance of alleles with and without the deletion.

## Discussion

In this study, we established an iNeuron RNA-Seq diagnostic workflow that successfully activated neuronal genes and yielded results of potential diagnostic value in 25.4% (18/71) in a cohort of individuals presenting with various neurological disorders. The creation of iNeurons was crucial in five of these individuals, as the critical gene/isoform had

low to no expression in fibroblasts. In an attempt to benchmark the degree of neuronal conversion, we compiled a list of genes linked to Mendelian disorders with a neurological phenotypic component and concluded that about half of these genes with a low expression can be effectively activated. The iNeurons used in our experiments represent an artificial “neuron-like” cell line with a snapshot at a specific time point, which cannot reconstitute the granularity of

gene expressions from different neural or neuronal subtypes of cells and the temporospatial complexity of their arrangement in the human developmental brain.<sup>70–74</sup> Notably, a subset of genes associated with neurological phenotypes, particularly those expressed in glial cells and neural progenitor cells, and region-specific genes, such as those found in the midbrain, hindbrain, and spinal cord, were not well activated (data not shown). In addition, a small number of genes are not *bona fide* “neuronal” but ended up in the neurological OMIM gene list because they cause neurological phenotypes secondarily. We envision that several strategies can be implemented to improve the scale of neurological gene coverage in a transdifferentiation RNA-seq workflow, such as optimization of the current protocol, complementation from alternative cell conversion protocols targeting different neural cell types, reprogramming into neural progenitor cells and branching the differentiation into various neural cells, and collection at different differentiation time points.

Although alternative splicing is particularly ubiquitous and highly conserved in the nervous system tissues of vertebrates, and has been associated with various neurological diseases,<sup>75–78</sup> few causal relationships have been established between particular neuronal isoforms and Mendelian disorders. We demonstrate that neuron-specific isoforms can be effectively activated from the neuron induction. The *MBD5* 5' UTR deletion illustrates that accessibility to neuron-specific isoforms directly benefits molecular diagnosis and potentially enables exploration into unrecognized disease mechanisms. The successful reconstitution of neuron-specific isoforms, although challenging to benchmark with the current knowledge, provides assurance that not only genetics but also epigenetics is reasonably established to model the disease mechanism in the personalized cellular environment. As more experience is accumulated regarding the efficacy and safety of implementing the iNeuron diagnostic workflow, we reason that attempts can be made to utilize the individual-derived iNeuron cell lines for molecular diagnosis stratification and therapy screening.

In contrast to iPSC-derived neurons, the transdifferentiation approach involves fewer induction steps, skips the stem cell-like stage, and better preserves the epigenetic signatures.<sup>33,45,79–81</sup> It holds significant potential for disease modeling, personalized drug testing, and the development of autologous cell therapy.<sup>79,80</sup> However, its use in clinical diagnostics is still in its early stages. One of our primary motivations in developing the iNeuron RNA-Seq workflow is to ensure its suitability for implementation into a high-volume clinical diagnostic operation. In addition to showing the clinical utility and technical robustness, it is crucial to demonstrate that the protocol is well designed so testing laboratories can properly manage the turnaround time, consumable cost, and technologists' training requirements. Compared to the conventional approach to differentiate neuronal cells through iPSC reprogramming, the cell culture of the transdifferentiation method can be

accomplished within eight weeks – substantial time is saved by omitting the intermediate iPSC procedures, although further shortening of the processing time would still make it more attractive to clinical users. The shortened cell culture time translates to direct savings in the culture consumables; the per use cost of cell culture reagents is also lower than that of the iPSC culture. The overall cost of cell culture is substantially lower than that from the iPSC-neuron differentiation approach. In our experience, the per sample cell culture reagent cost is approximately \$400. Collectively, the reasonable processing time and the low reagent cost opens a viable channel for clinical laboratories to consider adopting the transdifferentiation workflow.

Conventional iPSC reprogramming and neuronal differentiation requires specialized training for technologists to pick colonies, maintain pluripotency, and select neural progenitor cells. The procedure of transdifferentiation can be accomplished with minimum cell culture experience.<sup>80,81</sup> Furthermore, we established QC metrics to provide transparent measurements of the quality and reproducibility of the iNeuron generations, which alleviates the pressures for clinical laboratory technologists to make experience-based judgements. Our recommended QC checkpoints include qPCR analysis for *ASCL1* expression and computation of an iNeuron score from RNA-seq data. These QC assays provide results that are easily quantifiable and replaces the more labor-intensive approaches such as immunostaining. In practice, implementation of the QC checkpoints can effectively rule out potentially failing samples and thus save time and reagent/sequencing cost.

Introducing cellular engineering into the diagnostic workflow provides a functional and tissue-informed view of rare disease-causing variants in a non-invasive manner, which represents a unique opportunity to realize personalized precision medicine in a Petri dish. Our proof-of-concept study on neurological genetic disorders serves as a framework that can be applied to target other genetic disorders, such as targeting cardiovascular disorders through cardiomyocyte transdifferentiation.<sup>82,83</sup> In the past decade, the rapid development of medical genomics has fueled the widespread implementation of laboratory genomics sequencing, which generated a tremendous wealth of clinical big data that has propelled many discoveries in genomic science. Individual-derived cell manipulation is the reasonable next step for clinical genetics laboratories to pursue to improve patient care, and, if implemented clinically at a large scale, can generate paradigm-shifting large data to transform the study of genomic sciences.

### Data and code availability

UDN sequencing data are available through dbGaP (accession: phs001232.v2.p1) and the UDN Gateway. Phenotype

data with flagged genes of interest have been submitted to Phenome Central. DNA variants thought to contribute to the molecular diagnoses of the patients have been submitted to ClinVar.

### Supplemental information

Supplemental information can be found online at <https://doi.org/10.1016/j.ajhg.2024.03.007>.

### Acknowledgments

The research was supported by National Institutes of Health Common Fund (U01HG007709 and U01HG007942) and the grant from National Human Genome Research Institute (R35HG011311). The project was also supported by the BCM Intellectual and Developmental Disabilities Research Center that is funded by the Eunice Kennedy Shriver National Institute of Child Health & Human Development of the National Institutes of Health under Award Number P50HD103555 for use of the Human Stem Cell and Neuronal Differentiation Core facility and the Clinical Translational Core facility. The content is solely the responsibility of the authors and does not necessarily represent the official views of the National Institutes of Health.

### Author contributions

Conceptualization, S. Li, J.C.S., P.L.; methodology, S. Li, S.Z., J.C.S., A.B.; investigation, S. Li, S.Z., J.C.S., J.S., M.T.T.N., A.K., P.P.H., M.P.; resources, K.C.W., L.C.B., M.W.-H., S.K., W.J.C., G.D.C., S. Lalani, C.A.B., K.M., H.-T.C., L.P., L.E., C.M.E., B.L.; data curation, S. Li, S.Z., J.C.S., M.B.N., Z.L.; visualization: S. Li, S.Z., J.C.S.; funding acquisition, P.L., C.M.E., B.L.; project administration, J.A.R., S. Li, J.C.S., C.M.E., B.L.; supervision, P.L., J.A.R., A.B., S.C.S.N., C.M.E., B.L.; writing – original draft, S. Li, P.L.; writing – review & editing, S. Li, P.L., S.Z., J.A.R., A.B., C.M.E., B.L., H.-T.C., K.C.W., K.M., G.D.C.

### Declaration of interests

Baylor College of Medicine (BCM) and Miraca Holdings Inc. have formed a joint venture with shared ownership and governance of Baylor Genetics (BG), which performs genetic testing and derives revenue. P.L. and C.M.E. are employees of BCM and derive support through a professional services agreement with BG.

Received: October 4, 2023

Accepted: March 11, 2024

Published: April 8, 2024

### Web resources

GenBank, <https://www.ncbi.nlm.nih.gov/genbank/>  
OMIM, <https://www.omim.org/>

### References

1. Liu, P., Meng, L., Normand, E.A., Xia, F., Song, X., Ghazi, A., Rosenfeld, J., Magoulas, P.L., Braxton, A., Ward, P., et al. (2019). Reanalysis of Clinical Exome Sequencing Data. *N. Engl. J. Med.* *380*, 2478–2480. <https://doi.org/10.1056/NEJMc1812033>.
2. Yang, Y., Muzny, D.M., Reid, J.G., Bainbridge, M.N., Willis, A., Ward, P.A., Braxton, A., Beuten, J., Xia, F., Niu, Z., et al. (2013). Clinical whole-exome sequencing for the diagnosis of mendelian disorders. *N. Engl. J. Med.* *369*, 1502–1511. <https://doi.org/10.1056/NEJMoa1306555>.
3. Splinter, K., Adams, D.R., Bacino, C.A., Bellen, H.J., Bernstein, J.A., Cheattle-Jarvela, A.M., Eng, C.M., Esteves, C., Gahl, W.A., Hamid, R., et al. (2018). Effect of Genetic Diagnosis on Patients with Previously Undiagnosed Disease. *N. Engl. J. Med.* *379*, 2131–2139. <https://doi.org/10.1056/NEJMoa1714458>.
4. Wright, C.F., Campbell, P., Eberhardt, R.Y., Aitken, S., Perrett, D., Brent, S., Danecek, P., Gardner, E.J., Chundru, V.K., Lindsay, S.J., et al. (2023). Genomic Diagnosis of Rare Pediatric Disease in the United Kingdom and Ireland. *N. Engl. J. Med.* *388*, 1559–1571. <https://doi.org/10.1056/NEJMoa2209046>.
5. Lionel, A.C., Costain, G., Monfared, N., Walker, S., Reuter, M.S., Hosseini, S.M., Thiruvahindrapuram, B., Merico, D., Jobling, R., Nalpathamkalam, T., et al. (2018). Improved diagnostic yield compared with targeted gene sequencing panels suggests a role for whole-genome sequencing as a first-tier genetic test. *Genet. Med.* *20*, 435–443. <https://doi.org/10.1038/gim.2017.119>.
6. Shashi, V., Schoch, K., Spillmann, R., Cope, H., Tan, Q.K.-G., Walley, N., Pena, L., McConkie-Rosell, A., Jiang, Y.-H., Stong, N., et al. (2019). A comprehensive iterative approach is highly effective in diagnosing individuals who are exome negative. *Genet. Med.* *21*, 161–172. <https://doi.org/10.1038/s41436-018-0044-2>.
7. Lee, H., Deignan, J.L., Dorrani, N., Strom, S.P., Kantarci, S., Quintero-Rivera, F., Das, K., Toy, T., Harry, B., Yourshaw, M., et al. (2014). Clinical exome sequencing for genetic identification of rare Mendelian disorders. *JAMA* *312*, 1880–1887. <https://doi.org/10.1001/jama.2014.14604>.
8. Monies, D., Abouelhoda, M., Assoum, M., Moghrabi, N., Rafiullah, R., Almontashiri, N., Alowain, M., Alzaidan, H., Alsayed, M., Subhani, S., et al. (2019). Lessons Learned from Large-Scale, First-Tier Clinical Exome Sequencing in a Highly Consanguineous Population. *Am. J. Hum. Genet.* *105*, 879. <https://doi.org/10.1016/j.ajhg.2019.09.019>.
9. van der Sanden, B.P.G.H., Schobers, G., Corominas Galbany, J., Koolen, D.A., Sinnema, M., van Reeuwijk, J., Stumpel, C.T.R.M., Kleefstra, T., de Vries, B.B.A., Ruitkamp-Versteeg, M., et al. (2023). The performance of genome sequencing as a first-tier test for neurodevelopmental disorders. *Eur. J. Hum. Genet.* *31*, 81–88. <https://doi.org/10.1038/s41431-022-01185-9>.
10. de Ligt, J., Willemsen, M.H., van Bon, B.W.M., Kleefstra, T., Yntema, H.G., Kroes, T., Vulto-van Silfhout, A.T., Koolen, D.A., de Vries, P., Gilissen, C., et al. (2012). Diagnostic exome sequencing in persons with severe intellectual disability. *N. Engl. J. Med.* *367*, 1921–1929. <https://doi.org/10.1056/NEJMoa1206524>.
11. Jaganathan, K., Kyriazopoulou Panagiotopoulou, S., McRae, J.F., Darbandi, S.F., Knowles, D., Li, Y.I., Kosmicki, J.A., Arbe-laez, J., Cui, W., Schwartz, G.B., et al. (2019). Predicting Splicing from Primary Sequence with Deep Learning. *Cell* *176*, 535–548.e24. <https://doi.org/10.1016/j.cell.2018.12.015>.
12. Sundaram, L., Gao, H., Padigepati, S.R., McRae, J.F., Li, Y., Kosmicki, J.A., Fritzilas, N., Hakenberg, J., Dutta, A., Shon, J., et al. (2018). Predicting the clinical impact of human mutation with deep neural networks. *Nat. Genet.* *50*, 1161–1170. <https://doi.org/10.1038/s41588-018-0167-z>.

13. Kircher, M., Witten, D.M., Jain, P., O’Roak, B.J., Cooper, G.M., and Shendure, J. (2014). A general framework for estimating the relative pathogenicity of human genetic variants. *Nat. Genet.* 46, 310–315. <https://doi.org/10.1038/ng.2892>.
14. Ioannidis, N.M., Rothstein, J.H., Pejaver, V., Middha, S., McDonnell, S.K., Baheti, S., Musolf, A., Li, Q., Holzinger, E., Karyadi, D., et al. (2016). REVEL: An Ensemble Method for Predicting the Pathogenicity of Rare Missense Variants. *Am. J. Hum. Genet.* 99, 877–885. <https://doi.org/10.1016/j.ajhg.2016.08.016>.
15. Richards, S., Aziz, N., Bale, S., Bick, D., Das, S., Gastier-Foster, J., Grody, W.W., Hegde, M., Lyon, E., Spector, E., et al. (2015). Standards and guidelines for the interpretation of sequence variants: a joint consensus recommendation of the American College of Medical Genetics and Genomics and the Association for Molecular Pathology. *Genet. Med.* 17, 405–424. <https://doi.org/10.1038/gim.2015.30>.
16. Stenson, P.D., Mort, M., Ball, E.V., Evans, K., Hayden, M., Heywood, S., Hussain, M., Phillips, A.D., and Cooper, D.N. (2017). The Human Gene Mutation Database: towards a comprehensive repository of inherited mutation data for medical research, genetic diagnosis and next-generation sequencing studies. *Hum. Genet.* 136, 665–677. <https://doi.org/10.1007/s00439-017-1779-6>.
17. Soemedi, R., Cygan, K.J., Rhine, C.L., Wang, J., Bulacan, C., Yang, J., Bayrak-Toydemir, P., McDonald, J., and Fairbrother, W.G. (2017). Pathogenic variants that alter protein code often disrupt splicing. *Nat. Genet.* 49, 848–855. <https://doi.org/10.1038/ng.3837>.
18. Cummings, B.B., Marshall, J.L., Tukiainen, T., Lek, M., Donkervoort, S., Foley, A.R., Bolduc, V., Waddell, L.B., Sandaradura, S.A., O’Grady, G.L., et al. (2017). Improving genetic diagnosis in Mendelian disease with transcriptome sequencing. *Sci. Transl. Med.* 9, eaal5209. <https://doi.org/10.1126/scitranslmed.aal5209>.
19. Kremer, L.S., Bader, D.M., Mertes, C., Kopajtich, R., Pichler, G., Iuso, A., Haack, T.B., Graf, E., Schwarzmayr, T., Terrile, C., et al. (2017). Genetic diagnosis of Mendelian disorders via RNA sequencing. *Nat. Commun.* 8, 15824. <https://doi.org/10.1038/ncomms15824>.
20. Gonorazky, H.D., Naumenko, S., Ramani, A.K., Nelakuditi, V., Mashouri, P., Wang, P., Kao, D., Ohri, K., Viththiyapaskaran, S., Tarnopolsky, M.A., et al. (2019). Expanding the Boundaries of RNA Sequencing as a Diagnostic Tool for Rare Mendelian Disease. *Am. J. Hum. Genet.* 104, 466–483. <https://doi.org/10.1016/j.ajhg.2019.01.012>.
21. Frésard, L., Smail, C., Ferraro, N.M., Teran, N.A., Li, X., Smith, K.S., Bonner, D., Kernohan, K.D., Marwaha, S., Zappala, Z., et al. (2019). Identification of rare-disease genes using blood transcriptome sequencing and large control cohorts. *Nat. Med.* 25, 911–919. <https://doi.org/10.1038/s41591-019-0457-8>.
22. Murdock, D.R., Dai, H., Burrage, L.C., Rosenfeld, J.A., Ketkar, S., Müller, M.F., Yépez, V.A., Gagneur, J., Liu, P., Chen, S., et al. (2021). Transcriptome-directed analysis for Mendelian disease diagnosis overcomes limitations of conventional genomic testing. *J. Clin. Invest.* 131, 141500. <https://doi.org/10.1172/JCI141500>.
23. Yépez, V.A., Gusic, M., Kopajtich, R., Mertes, C., Smith, N.H., Alston, C.L., Ban, R., Beblo, S., Berutti, R., Blessing, H., et al. (2022). Clinical implementation of RNA sequencing for Mendelian disease diagnostics. *Genome Med.* 14, 38. <https://doi.org/10.1186/s13073-022-01019-9>.
24. Lee, H.-F., Chi, C.-S., and Tsai, C.-R. (2021). Diagnostic yield and treatment impact of whole-genome sequencing in paediatric neurological disorders. *Dev. Med. Child Neurol.* 63, 934–938. <https://doi.org/10.1111/dmnc.14722>.
25. Dekker, J., Schot, R., Bongaerts, M., de Valk, W.G., van Veghel-Plandsoen, M.M., Monfils, K., Douben, H., Elfferich, P., Kasteleijn, E., van Unen, L.M.A., et al. (2023). Web-accessible application for identifying pathogenic transcripts with RNA-seq: Increased sensitivity in diagnosis of neurodevelopmental disorders. *Am. J. Hum. Genet.* 110, 251–272. <https://doi.org/10.1016/j.ajhg.2022.12.015>.
26. Oquendo, C.J., Wai, H.A., Rich, W., Bunyan, D.J., Thomas, N.S., Hunt, D., Lord, J., Douglas, A.G.L., and Baralle, D. (2023). RNA sequencing uplifts diagnostic rate in undiagnosed rare disease patients. Preprint at medRxiv. <https://doi.org/10.1101/2023.07.05.23292254>.
27. Maddirevula, S., Kuwahara, H., Ewida, N., Shamseldin, H.E., Patel, N., Alzahrani, F., AlSheddi, T., AlObeid, E., Alenazi, M., Alsaif, H.S., et al. (2020). Analysis of transcript-deleterious variants in Mendelian disorders: implications for RNA-based diagnostics. *Genome Biol.* 21, 145. <https://doi.org/10.1186/s13059-020-02053-9>.
28. Aicher, J.K., Jewell, P., Vaquero-Garcia, J., Barash, Y., and Bhoj, E.J. (2020). Mapping RNA splicing variations in clinically accessible and nonaccessible tissues to facilitate Mendelian disease diagnosis using RNA-seq. *Genet. Med.* 22, 1181–1190. <https://doi.org/10.1038/s41436-020-0780-y>.
29. Wang, E.T., Sandberg, R., Luo, S., Khrebtkova, I., Zhang, L., Mayr, C., Kingsmore, S.F., Schroth, G.P., and Burge, C.B. (2008). Alternative Isoform Regulation in Human Tissue Transcriptomes. *Nature* 456, 470–476. <https://doi.org/10.1038/nature07509>.
30. Bj, B. (2006). Alternative splicing: new insights from global analyses. *Cell* 126. <https://doi.org/10.1016/j.cell.2006.06.023>.
31. Wang, H., Yang, Y., Liu, J., and Qian, L. (2021). Direct cell reprogramming: approaches, mechanisms and progress. *Nat. Rev. Mol. Cell Biol.* 22, 410–424. <https://doi.org/10.1038/s41580-021-00335-z>.
32. Takahashi, K., and Yamanaka, S. (2016). A decade of transcription factor-mediated reprogramming to pluripotency. *Nat. Rev. Mol. Cell Biol.* 17, 183–193. <https://doi.org/10.1038/nrm.2016.8>.
33. Herdy, J., Schafer, S., Kim, Y., Ansari, Z., Zangwill, D., Ku, M., Paquola, A., Lee, H., Mertens, J., and Gage, F.H. (2019). Chemical modulation of transcriptionally enriched signaling pathways to optimize the conversion of fibroblasts into neurons. *Elife* 8, e41356. <https://doi.org/10.7554/eLife.41356>.
34. DeLuca, D.S., Levin, J.Z., Sivachenko, A., Fennell, T., Nazaire, M.-D., Williams, C., Reich, M., Winckler, W., and Getz, G. (2012). RNA-SeQC: RNA-seq metrics for quality control and process optimization. *Bioinformatics* 28, 1530–1532. <https://doi.org/10.1093/bioinformatics/bts196>.
35. Graubert, A., Aguet, F., Ravi, A., Ardlie, K.G., and Getz, G. (2021). RNA-SeQC 2: efficient RNA-seq quality control and quantification for large cohorts. *Bioinformatics* 37, 3048–3050. <https://doi.org/10.1093/bioinformatics/btab135>.
36. Zhou, Y., Zhou, B., Pache, L., Chang, M., Khodabakhshi, A.H., Tanaseichuk, O., Benner, C., and Chanda, S.K. (2019). Metascape provides a biologist-oriented resource for the analysis of systems-level datasets. *Nat. Commun.* 10, 1523. <https://doi.org/10.1038/s41467-019-09234-6>.
37. Bariinka, J., Hu, Z., Wang, L., Wheeler, D.A., Rahbarinia, D., McLeod, C., Gu, Z., and Mullighan, C.G. (2022). RNAseqCNV: analysis of large-scale copy number variations from RNA-seq

- data. *Leukemia* 36, 1492–1498. <https://doi.org/10.1038/s41375-022-01547-8>.
38. Suvakov, M., Panda, A., Diesh, C., Holmes, I., and Abyzov, A. (2021). CNVpytor: a tool for copy number variation detection and analysis from read depth and allele imbalance in whole-genome sequencing. *GigaScience* 10, giab074. <https://doi.org/10.1093/gigascience/giab074>.
  39. Yépez, V.A., Mertes, C., Müller, M.F., Klaproth-Andrade, D., Wachutka, L., Frésard, L., Gusic, M., Scheller, I.F., Goldberg, P.F., Prokisch, H., and Gagneur, J. (2021). Detection of aberrant gene expression events in RNA sequencing data. *Nat. Protoc.* 16, 1276–1296. <https://doi.org/10.1038/s41596-020-00462-5>.
  40. Chen, Z., Zheng, Y., Yang, Y., Huang, Y., Zhao, S., Zhao, H., Yu, C., Dong, X., Zhang, Y., Wang, L., et al. (2022). PhenoApt leverages clinical expertise to prioritize candidate genes via machine learning. *Am. J. Hum. Genet.* 109, 270–281. <https://doi.org/10.1016/j.ajhg.2021.12.008>.
  41. Li, B., Ruotti, V., Stewart, R.M., Thomson, J.A., and Dewey, C.N. (2010). RNA-Seq gene expression estimation with read mapping uncertainty. *Bioinformatics* 26, 493–500. <https://doi.org/10.1093/bioinformatics/btp692>.
  42. Vasan, L., Park, E., David, L.A., Fleming, T., and Schuurmans, C. (2021). Direct Neuronal Reprogramming: Bridging the Gap Between Basic Science and Clinical Application. *Front. Cell Dev. Biol.* 9, 681087.
  43. Immaneni, A., Lawinger, P., Zhao, Z., Lu, W., Rastelli, L., Morris, J.H., and Majumder, S. (2000). REST-VP16 activates multiple neuronal differentiation genes in human NT2 cells. *Nucleic Acids Res.* 28, 3403–3410.
  44. Victor, M.B., Richner, M., Hermanstynne, T.O., Ransdell, J.L., Sobieski, C., Deng, P.-Y., Klyachko, V.A., Nerbonne, J.M., and Yoo, A.S. (2014). Generation of human striatal neurons by microRNA-dependent direct conversion of fibroblasts. *Neuron* 84, 311–323. <https://doi.org/10.1016/j.neuron.2014.10.016>.
  45. Herdy, J.R., Traxler, L., Agarwal, R.K., Karbacher, L., Schlachetzki, J.C.M., Boehnke, L., Zangwill, D., Galasko, D., Glass, C.K., Mertens, J., and Gage, F.H. (2022). Increased post-mitotic senescence in aged human neurons is a pathological feature of Alzheimer's disease. *Cell Stem Cell* 29, 1637–1652.e6. <https://doi.org/10.1016/j.stem.2022.11.010>.
  46. Lund, R.J., Närvä, E., and Lahesmaa, R. (2012). Genetic and epigenetic stability of human pluripotent stem cells. *Nat. Rev. Genet.* 13, 732–744. <https://doi.org/10.1038/nrg3271>.
  47. Liu, P., Kaplan, A., Yuan, B., Hanna, J.H., Lupski, J.R., and Reiner, O. (2014). Passage number is a major contributor to genomic structural variations in mouse iPSCs. *Stem Cell.* 32, 2657–2667. <https://doi.org/10.1002/stem.1779>.
  48. Gross, A.M., Ajay, S.S., Rajan, V., Brown, C., Bluske, K., Burns, N.J., Chawla, A., Coffey, A.J., Malhotra, A., Scocchia, A., et al. (2019). Copy-number variants in clinical genome sequencing: deployment and interpretation for rare and undiagnosed disease. *Genet. Med.* 21, 1121–1130. <https://doi.org/10.1038/s41436-018-0295-y>.
  49. Trost, B., Walker, S., Wang, Z., Thiruvahindrapuram, B., MacDonald, J.R., Sung, W.W.L., Pereira, S.L., Whitney, J., Chan, A.J.S., Pellecchia, G., et al. (2018). A Comprehensive Workflow for Read Depth-Based Identification of Copy-Number Variation from Whole-Genome Sequence Data. *Am. J. Hum. Genet.* 102, 142–155. <https://doi.org/10.1016/j.ajhg.2017.12.007>.
  50. Ee, B., W, Z., F, V.-B., A, T.-R., P, L., and Ja, B. (2021). Combined Genome Sequencing and RNA Analysis Reveals and Characterizes a Deep Intronic Variant in IGHMBP2 in a Patient With Spinal Muscular Atrophy With Respiratory Distress Type 1. *Pediatr. Neurol.* 114. <https://doi.org/10.1016/j.pediatrneurol.2020.09.011>.
  51. Brechtmann, F., Mertes, C., Matusėvičiūtė, A., Yépez, V.A., Avsec, Ž., Herzog, M., Bader, D.M., Prokisch, H., and Gagneur, J. (2018). OUTRIDER: A Statistical Method for Detecting Aberrantly Expressed Genes in RNA Sequencing Data. *Am. J. Hum. Genet.* 103, 907–917. <https://doi.org/10.1016/j.ajhg.2018.10.025>.
  52. Mertes, C., Scheller, I.F., Yépez, V.A., Çelik, M.H., Liang, Y., Kremer, L.S., Gusic, M., Prokisch, H., and Gagneur, J. (2021). Detection of aberrant splicing events in RNA-seq data using FRASER. *Nat. Commun.* 12, 529. <https://doi.org/10.1038/s41467-020-20573-7>.
  53. Accogli, A., Lu, S., Musante, I., Scudieri, P., Rosenfeld, J.A., Severino, M., Baldassari, S., Iacomino, M., Riva, A., Balagura, G., et al. (2023). Loss of Neuron Navigator 2 Impairs Brain and Cerebellar Development. *Cerebellum* 22, 206–222. <https://doi.org/10.1007/s12311-022-01379-3>.
  54. Akula, S.K., Marciano, J.H., Lim, Y., Exposito-Alonso, D., Hyton, N.K., Hwang, G.H., Neil, J.E., Dominado, N., Bunton-Stasyshyn, R.K., Song, J.H.T., et al. (2023). TMEM161B regulates cerebral cortical gyration, Sonic Hedgehog signaling, and ciliary structure in the developing central nervous system. *Proc. Natl. Acad. Sci. USA.* 120, e2209964120. <https://doi.org/10.1073/pnas.2209964120>.
  55. AlAbdi, L., Desbois, M., Rusnac, D.-V., Sulaiman, R.A., Rosenfeld, J.A., Lalani, S., Murdock, D.R., Burrage, L.C., Undiagnosed Diseases Network, and Billie Au, P.Y., et al. (2023). Loss-of-function variants in MYCBP2 cause neurobehavioural phenotypes and corpus callosum defects. *Brain* 146, 1373–1387. <https://doi.org/10.1093/brain/awac364>.
  56. Keehan, L., Jiang, M.-M., Li, X., Marom, R., Dai, H., Murdock, D., Liu, P., Hunter, J.V., Heaney, J.D., Robak, L., et al. (2021). A Novel De Novo Intronic Variant in ITPR1 Causes Gillespie Syndrome. *Am. J. Med. Genet.* 185, 2315–2324. <https://doi.org/10.1002/ajmg.a.62232>.
  57. van de Leemput, J., Chandran, J., Knight, M.A., Holtzclaw, L.A., Scholz, S., Cookson, M.R., Houlden, H., Gwinn-Hardy, K., Fung, H.-C., Lin, X., et al. (2007). Deletion at ITPR1 underlies ataxia in mice and spinocerebellar ataxia 15 in humans. *PLoS Genet.* 3, e108. <https://doi.org/10.1371/journal.pgen.0030108>.
  58. Huang, L., Chardon, J.W., Carter, M.T., Friend, K.L., Dudding, T.E., Schwartzentruber, J., Zou, R., Schofield, P.W., Douglas, S., Bulman, D.E., and Boycott, K.M. (2012). Missense mutations in ITPR1 cause autosomal dominant congenital nonprogressive spinocerebellar ataxia. *Orphanet J. Rare Dis.* 7, 67. <https://doi.org/10.1186/1750-1172-7-67>.
  59. des Portes, V., Pinard, J.M., Billuart, P., Vinet, M.C., Koulakoff, A., Carrié, A., Gelot, A., Dupuis, E., Motte, J., Berwald-Netter, Y., et al. (1998). A novel CNS gene required for neuronal migration and involved in X-linked subcortical laminar heterotopia and lissencephaly syndrome. *Cell* 92, 51–61. [https://doi.org/10.1016/s0092-8674\(00\)80898-3](https://doi.org/10.1016/s0092-8674(00)80898-3).
  60. Francis, F., Koulakoff, A., Boucher, D., Chafey, P., Schaar, B., Vinet, M.C., Friocourt, G., McDonnell, N., Reiner, O., Kahn, A., et al. (1999). Doublecortin is a developmentally regulated, microtubule-associated protein expressed in migrating and differentiating neurons. *Neuron* 23, 247–256. [https://doi.org/10.1016/s0896-6273\(00\)80777-1](https://doi.org/10.1016/s0896-6273(00)80777-1).
  61. Kim, M.H., Cierpicki, T., Derewenda, U., Krowarsch, D., Feng, Y., Devedjiev, Y., Dauter, Z., Walsh, C.A., Otlewski, J.,

- Bushweller, J.H., and Derewenda, Z.S. (2003). The DCX-domain tandems of doublecortin and doublecortin-like kinase. *Nat. Struct. Biol.* *10*, 324–333. <https://doi.org/10.1038/nsb918>.
62. Hehr, U., Uyanik, G., Aigner, L., Couillard-Despres, S., and Winkler, J. (1993). In *DCX-Related Disorders*, GeneReviews®, M.P. Adam, D.B. Everman, G.M. Mirzaa, R.A. Pagon, S.E. Wallace, L.J. Bean, K.W. Gripp, and A. Amemiya, eds. (University of Washington, Seattle).
  63. Buchsbaum, I.Y., and Cappello, S. (2019). Neuronal migration in the CNS during development and disease: insights from in vivo and in vitro models. *Dev. Camb. Engl.* *146*, dev163766. <https://doi.org/10.1242/dev.163766>.
  64. Luo, X., Rosenfeld, J.A., Yamamoto, S., Harel, T., Zuo, Z., Hall, M., Wierenga, K.J., Pastore, M.T., Bartholomew, D., Delgado, M.R., et al. (2017). Clinically severe CACNA1A alleles affect synaptic function and neurodegeneration differentially. *PLoS Genet.* *13*, e1006905. <https://doi.org/10.1371/journal.pgen.1006905>.
  65. Pietrobon, D. (2010). CaV2.1 channelopathies. *Pflügers Archiv* *460*, 375–393. <https://doi.org/10.1007/s00424-010-0802-8>.
  66. Tonelli, A., D'Angelo, M.G., Salati, R., Villa, L., Germinasi, C., Frattini, T., Meola, G., Turconi, A.C., Bresolin, N., and Bassi, M.T. (2006). Early onset, non fluctuating spinocerebellar ataxia and a novel missense mutation in CACNA1A gene. *J. Neurol. Sci.* *241*, 13–17. <https://doi.org/10.1016/j.jns.2005.10.007>.
  67. Mullegama, S.V., Mendoza-Londono, R., and Elsea, S.H. (1993). In *MBD5 Haploinsufficiency*, GeneReviews®, M.P. Adam, D.B. Everman, G.M. Mirzaa, R.A. Pagon, S.E. Wallace, L.J. Bean, K.W. Gripp, and A. Amemiya, eds. (University of Washington, Seattle).
  68. Talkowski, M.E., Mullegama, S.V., Rosenfeld, J.A., van Bon, B.W.M., Shen, Y., Repnikova, E.A., Gastier-Foster, J., Thrush, D.L., Kathiresan, S., Ruderfer, D.M., et al. (2011). Assessment of 2q23.1 microdeletion syndrome implicates MBD5 as a single causal locus of intellectual disability, epilepsy, and autism spectrum disorder. *Am. J. Hum. Genet.* *89*, 551–563. <https://doi.org/10.1016/j.ajhg.2011.09.011>.
  69. Williams, S.R., Mullegama, S.V., Rosenfeld, J.A., Dagli, A.I., Hatchwell, E., Allen, W.P., Williams, C.A., and Elsea, S.H. (2010). Haploinsufficiency of MBD5 associated with a syndrome involving microcephaly, intellectual disabilities, severe speech impairment, and seizures. *Eur. J. Hum. Genet.* *18*, 436–441. <https://doi.org/10.1038/ejhg.2009.199>.
  70. Kang, H.J., Kawasawa, Y.I., Cheng, F., Zhu, Y., Xu, X., Li, M., Sousa, A.M.M., Pletikos, M., Meyer, K.A., Sedmak, G., et al. (2011). Spatio-temporal transcriptome of the human brain. *Nature* *478*, 483–489. <https://doi.org/10.1038/nature10523>.
  71. Kirsch, L., and Chechik, G. (2016). On Expression Patterns and Developmental Origin of Human Brain Regions. *PLoS Comput. Biol.* *12*, e1005064. <https://doi.org/10.1371/journal.pcbi.1005064>.
  72. Rakic, P. (2009). Evolution of the neocortex: a perspective from developmental biology. *Nat. Rev. Neurosci.* *10*, 724–735. <https://doi.org/10.1038/nrn2719>.
  73. Rubenstein, J.L.R. (2011). Annual Research Review: Development of the cerebral cortex: implications for neurodevelopmental disorders. *JCPP (J. Child Psychol. Psychiatry)* *52*, 339–355. <https://doi.org/10.1111/j.1469-7610.2010.02307.x>.
  74. Hill, R.S., and Walsh, C.A. (2005). Molecular insights into human brain evolution. *Nature* *437*, 64–67. <https://doi.org/10.1038/nature04103>.
  75. Dredge, B.K., Polydorides, A.D., and Darnell, R.B. (2001). The splice of life: alternative splicing and neurological disease. *Nat. Rev. Neurosci.* *2*, 43–50. <https://doi.org/10.1038/35049061>.
  76. Raj, T., Li, Y.I., Wong, G., Humphrey, J., Wang, M., Ramdhani, S., Wang, Y.-C., Ng, B., Gupta, I., Haroutunian, V., et al. (2018). Integrative transcriptome analyses of the aging brain implicate altered splicing in Alzheimer's disease susceptibility. *Nat. Genet.* *50*, 1584–1592. <https://doi.org/10.1038/s41588-018-0238-1>.
  77. Voineagu, I., Wang, X., Johnston, P., Lowe, J.K., Tian, Y., Horvath, S., Mill, J., Cantor, R.M., Blencowe, B.J., and Geschwind, D.H. (2011). Transcriptomic analysis of autistic brain reveals convergent molecular pathology. *Nature* *474*, 380–384. <https://doi.org/10.1038/nature10110>.
  78. Tollervey, J.R., Curk, T., Rogelj, B., Briese, M., Cereda, M., Kayikci, M., König, J., Hortobágyi, T., Nishimura, A.L., Zupunski, V., et al. (2011). Characterizing the RNA targets and position-dependent splicing regulation by TDP-43. *Nat. Neurosci.* *14*, 452–458. <https://doi.org/10.1038/nn.2778>.
  79. Jopling, C., Boue, S., and Izpisua Belmonte, J.C. (2011). Dedifferentiation, transdifferentiation and reprogramming: three routes to regeneration. *Nat. Rev. Mol. Cell Biol.* *12*, 79–89. <https://doi.org/10.1038/nrm3043>.
  80. Mollinari, C., Zhao, J., Lupacchini, L., Garaci, E., Merlo, D., and Pei, G. (2018). Transdifferentiation: a new promise for neurodegenerative diseases. *Cell Death Dis.* *9*, 830–839. <https://doi.org/10.1038/s41419-018-0891-4>.
  81. Xu, Z., Su, S., Zhou, S., Yang, W., Deng, X., Sun, Y., Li, L., and Li, Y. (2020). How to reprogram human fibroblasts to neurons. *Cell Biosci.* *10*, 116. <https://doi.org/10.1186/s13578-020-00476-2>.
  82. Ieda, M., Fu, J.-D., Delgado-Olguin, P., Vedantham, V., Hayashi, Y., Bruneau, B.G., and Srivastava, D. (2010). Direct reprogramming of fibroblasts into functional cardiomyocytes by defined factors. *Cell* *142*, 375–386. <https://doi.org/10.1016/j.cell.2010.07.002>.
  83. Cao, N., Huang, Y., Zheng, J., Spencer, C.I., Zhang, Y., Fu, J.-D., Nie, B., Xie, M., Zhang, M., Wang, H., et al. (2016). Conversion of human fibroblasts into functional cardiomyocytes by small molecules. *Science* *352*, 1216–1220. <https://doi.org/10.1126/science.aaf1502>.

**Supplemental information**

**The clinical utility and diagnostic  
implementation of human subject cell  
transdifferentiation followed by RNA sequencing**

**Shenglan Li, Sen Zhao, Jefferson C. Sinson, Aleksandar Bajic, Jill A. Rosenfeld, Matthew B. Neeley, Mezthly Pena, Kim C. Worley, Lindsay C. Burrage, Monika Weisz-Hubshman, Shamika Ketkar, William J. Craigen, Gary D. Clark, Seema Lalani, Carlos A. Bacino, Keren Machol, Hsiao-Tuan Chao (趙孝端), Lorraine Potocki, Lisa Emrick, Jennifer Sheppard, My T.T. Nguyen, Anahita Khoramnia, Paula Patricia Hernandez, Sandesh CS. Nagamani, Zhandong Liu, Undiagnosed Diseases Network, Christine M. Eng, Brendan Lee, and Pengfei Liu**



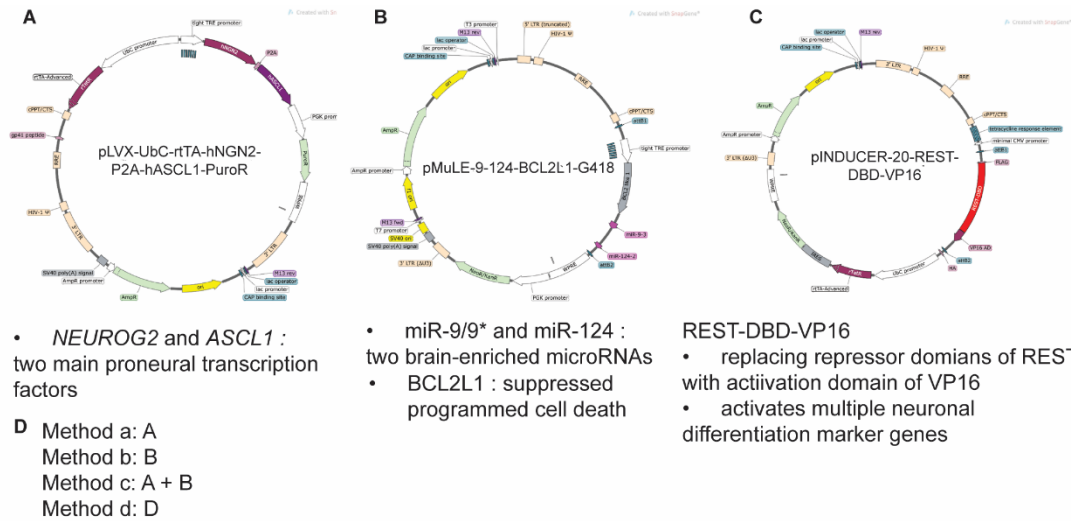

**Figure S1. Four transdifferentiation methods used in this study. (A-C)** Lentivirus vectors used in four transdifferentiation methods, including: **(A)** vector overexpressing the pro-neuronal transcription factors *NEUROG2* and *ASCL1*, **(B)** vector co-expressing the microRNA *miR-9/9\**, *miR-124*, and the anti-apoptotic gene *BCL2L1*, and **(C)** vector DBD-REST-VP16, involving the replacement of *REST/NRSF* repressor domains with the activation domain of the viral activator VP16. **(D)** Four methods used for transdifferentiation.

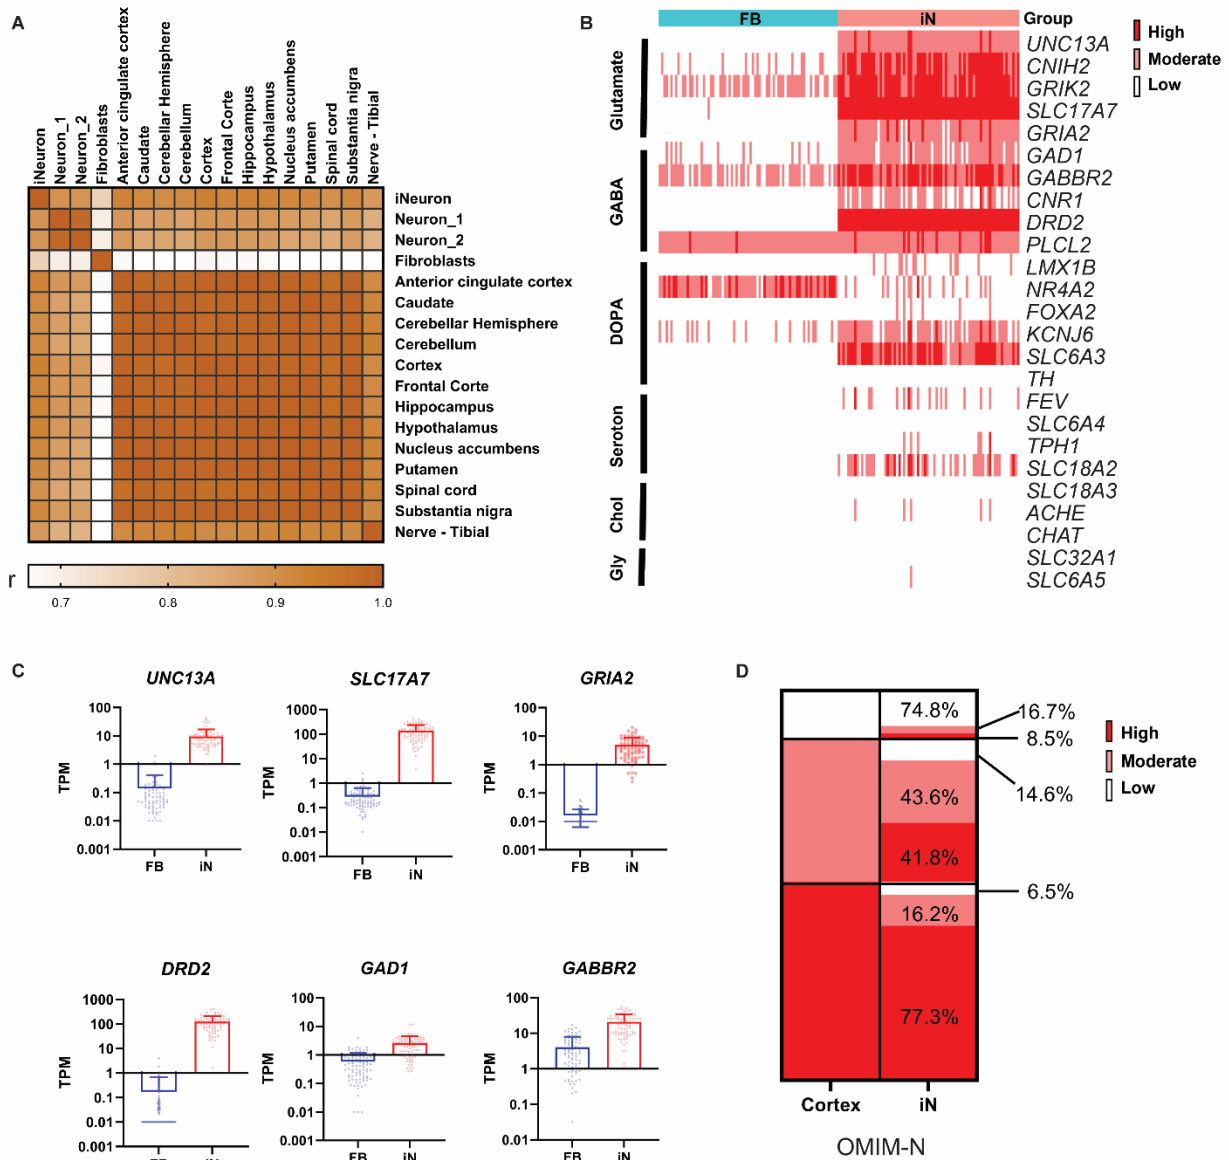

**Figure S2. Transcriptomic characterizations of iNeurons.** (A) Correlation heatmap comparing iNeurons with two iterations of iPSCs-derived neurons and a spectrum of neural tissues. Neuron\_1 represents neurons differentiated from iPSCs, while Neuron\_2 refers to neurons derived via overexpression of the neuronal transcription factor Neurog2 in iPSCs. (B) Heatmap showing the expression profiles of neuron subtype-specific genes across fibroblasts (FB) and iNeurons (iN). Genes related to glutamatergic neuron include Unc-13 homolog A (*UNC13A*),

AMPA receptor auxiliary protein 2 (*CNIH2*), GluK2 (*GRIK2*), glutamate ionotropic receptor AMPA type subunit 2 (*GRIA2*) and vGLUT1 (*SLC17A7*); GABAergic neuron markers include glutamate decarboxylase 1 (*GAD1*), gamma-aminobutyric acid type B receptor subunit 2 (*GABBR2*), cannabinoid receptor 1 (*CNRI*), dopamine receptor D2 (*DRD2*), and phospholipase C like 2 (*PLCL2*); dopaminergic neuron markers are represented by LIM homeobox transcription factor 1 beta (*LMX1B*), nuclear receptor subfamily 4 group A member 2 (*NR4A2*), potassium voltage-gated channel subfamily J member 6 (*KCNJ6*), DAT1 (*SLC6A3*) and Tyrosine hydroxylase (*TH*); serotonergic neuron markers encompass ETS transcription factor (*FEV*), serotonin transporter 1 (*SLC6A4*), tryptophan hydroxylase (*TPHI*), and VMAT2 (*SLC18A2*); cholinergic neuron markers comprise vesicular acetylcholine transporter (*SLC18A3*), Acetylcholinesterase (*ACHE*) and choline O-acetyltransferase (*CHAT*); glycinergic neuron-specific genes: VGAT (*SLC32A1*) and GlyT-2 (*SLC6A5*). **(C)** Boxplots delineate the TPM expression levels of selecte neuron subtype-specific genes, namely *UNC13A*, *SLC17A* and *GRIA2* for glutamatergic; *DRD2*, *GAD1* and *GABBR2* for GABAergic. The data is presented as mean  $\pm$  SD. **(D)** Comparative expression analysis of OMIM-N genes in the brain cortex (GTEx) and iNeurons, highlighting over 70% overlap for high- and low- expression genes. For moderate-expression genes, 43.6% are concordant and 41.8% are expressed higher in iNeurons. FB: fibroblasts, n=77; iN: iNeurons, n=91.

Intellectual disability

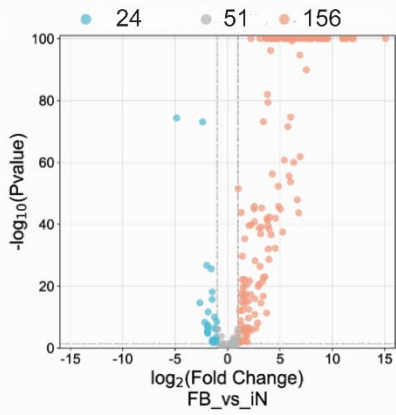

Brain malformation

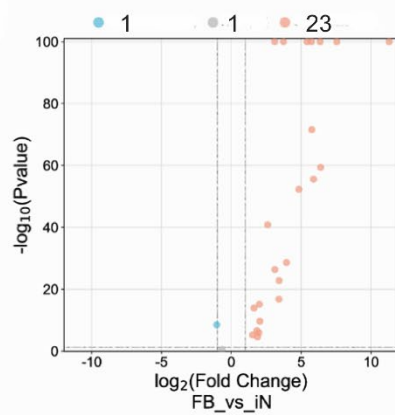

ASD

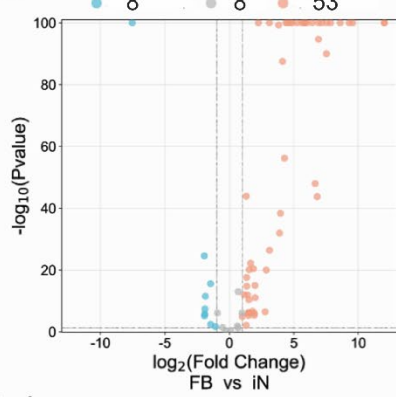

Epilepsy

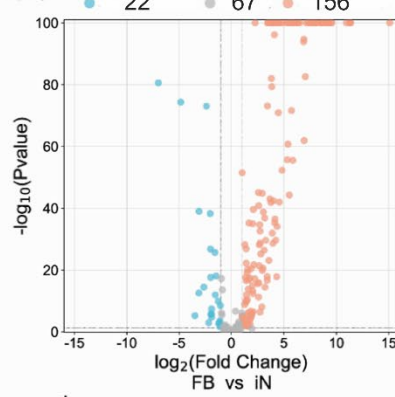

Ataxia

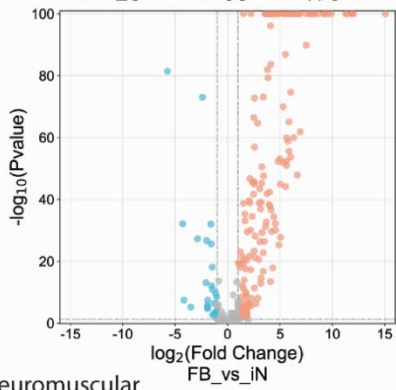

Neuropathy

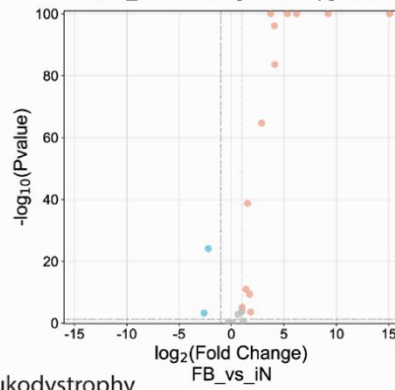

Neuromuscular

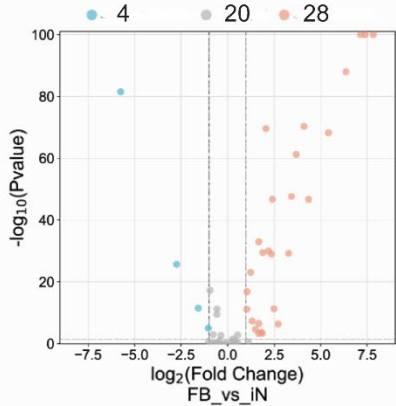

Leukodystrophy

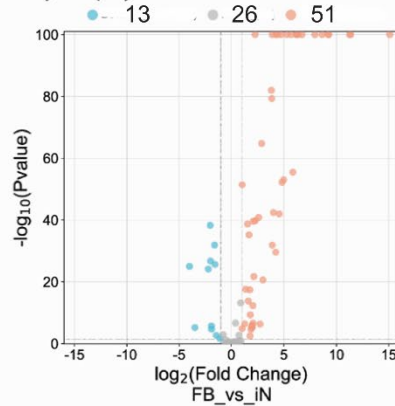

**Figure S3. Activation of low-expression genes in eight panels of genes that cause various neurological phenotypes.** The panels include intellectual disability, brain malformation (BM), autism spectrum disorder (ASD), epilepsy, ataxia, neuropathy, neuromuscular disorder, and leukodystrophy.

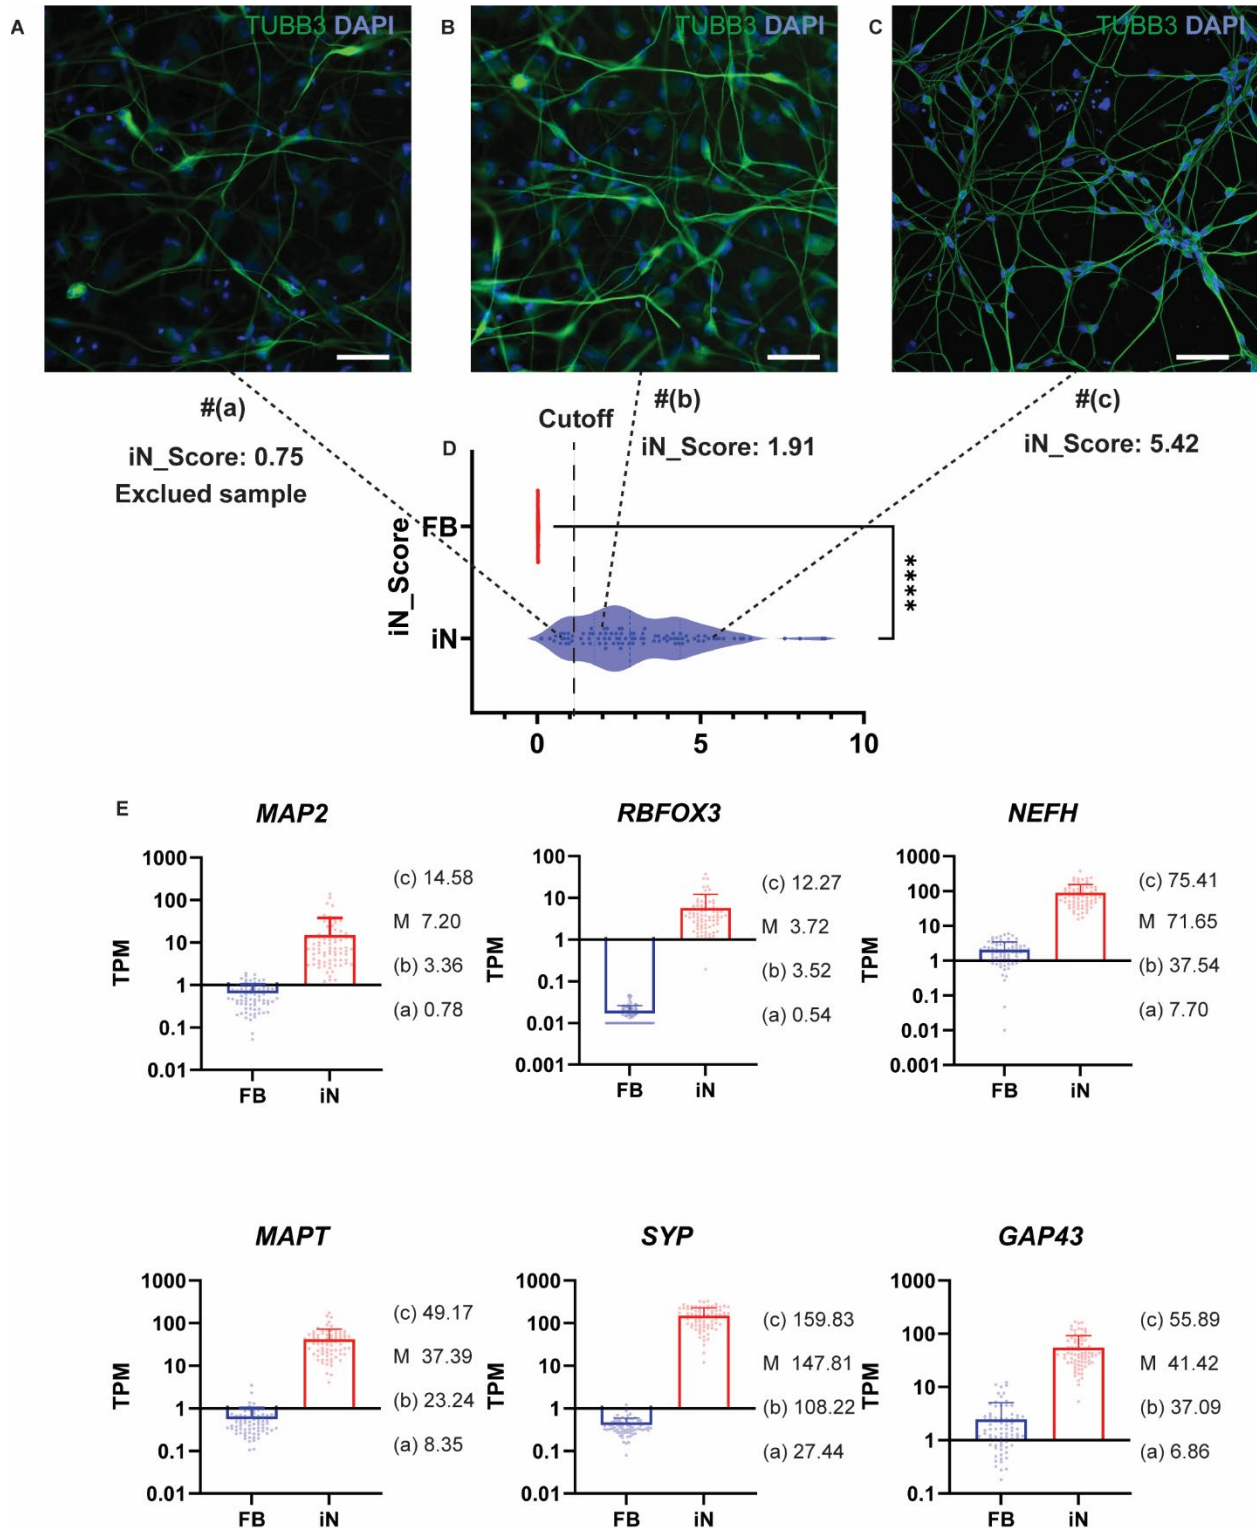

**Figure S4. iN\_Score and transdifferentiation efficiency in three representative iNeuron samples. (A-C)** Immunostaining of Tubulin  $\beta$ -III (TUBB3) in iNeuron samples from individual

#(a), #(b), and #(c). **(D)** iN-Score of iNeuron samples from individual #(a), #(b), and #(c). **(E)** The expression levels of mature neuron genes microtubule associated protein 2 (*MAP2*), NeuN (*RBF3*), neurofilament heavy chain (*NEFH*), Tau (*MAPT*), Synaptophysin (*SYP*) and growth associated protein 43 (*GAP43*) in fibroblasts (n=77) and iNeurons (n=82). The gene expression in individual #(a), #(b), #(c) is listed on the right. M indicates the average expression of all iNeuron samples. The data is presented as mean  $\pm$  SD.

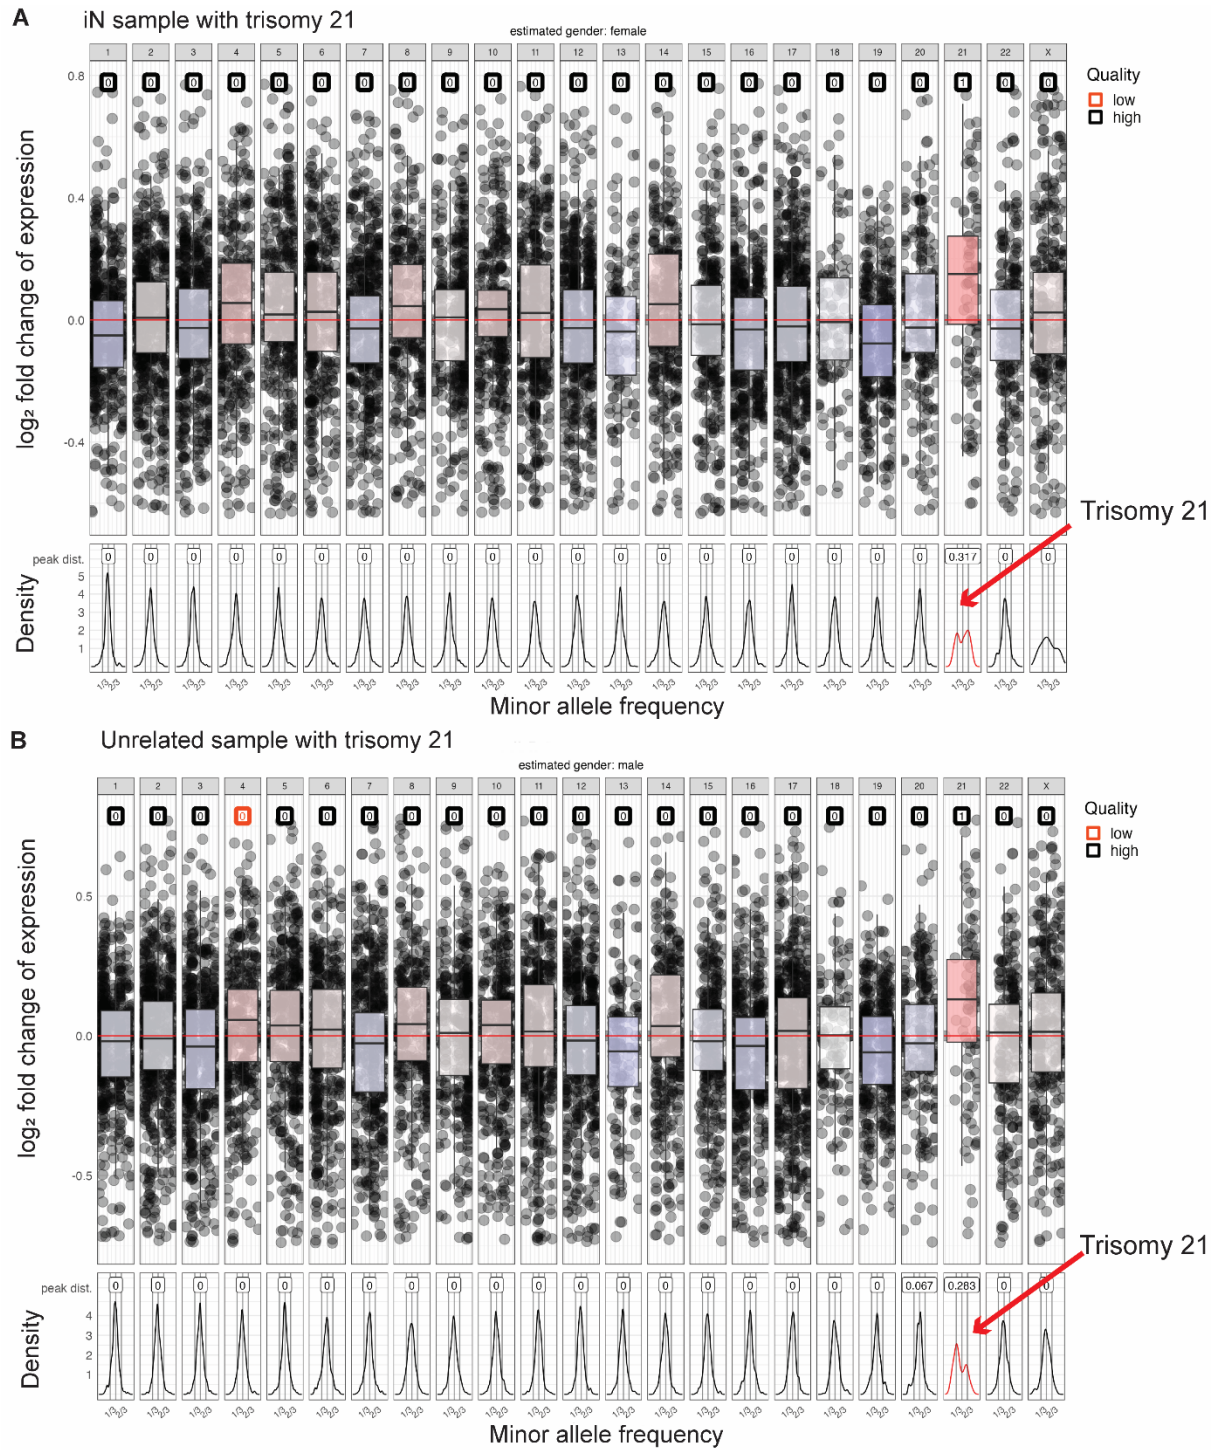

**Figure S5. Detection of chromosomal aneuploidies using RNA-seq-based computational analysis.** Among all the iNeuron samples included in this study, RNA-seq-based CNV analysis identified only one abnormality. This is illustrated as a gain of chromosome 21 in (A).



Diagnostic interpretation was performed with caution in this sample, and no molecular diagnosis was revealed. It is unclear whether the abnormality of chromosome 21 arose during or prior to the transdifferentiation. **(B)** denotes CNV plots from a positive control sample from an individual outside of this study with clinically confirmed trisomy 21. The experimental and bioinformatic RNA-seq analysis follow the same procedures as those described in this study.

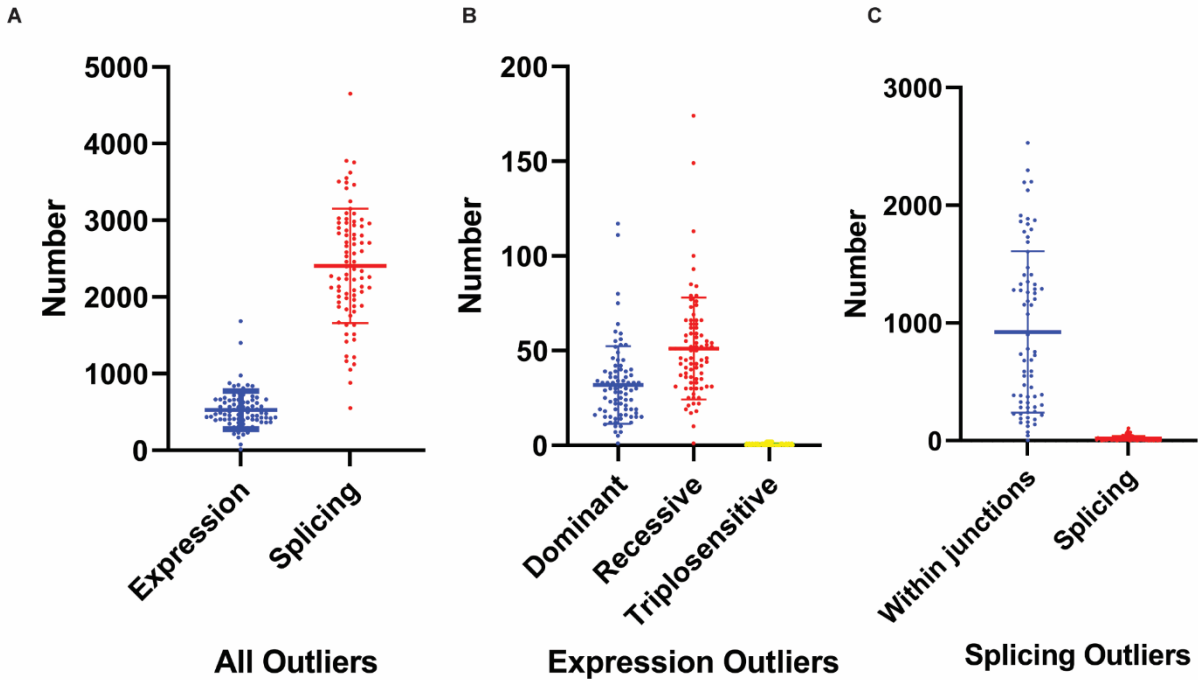

**Figure S6. Expression and splicing outliers through filtration at each step. (A)** Number of potential outliers identified in the initial step using our analytical workflow. **(B)** Number of expression outliers remaining after restricting to known disease-associated genes in ClinGen and OMIM. **(C)** Number of splicing outliers remaining after filtering DNA variant pairs and SpliceAI prediction. Data is presented as mean  $\pm$  SD. Each dot represents an individual.

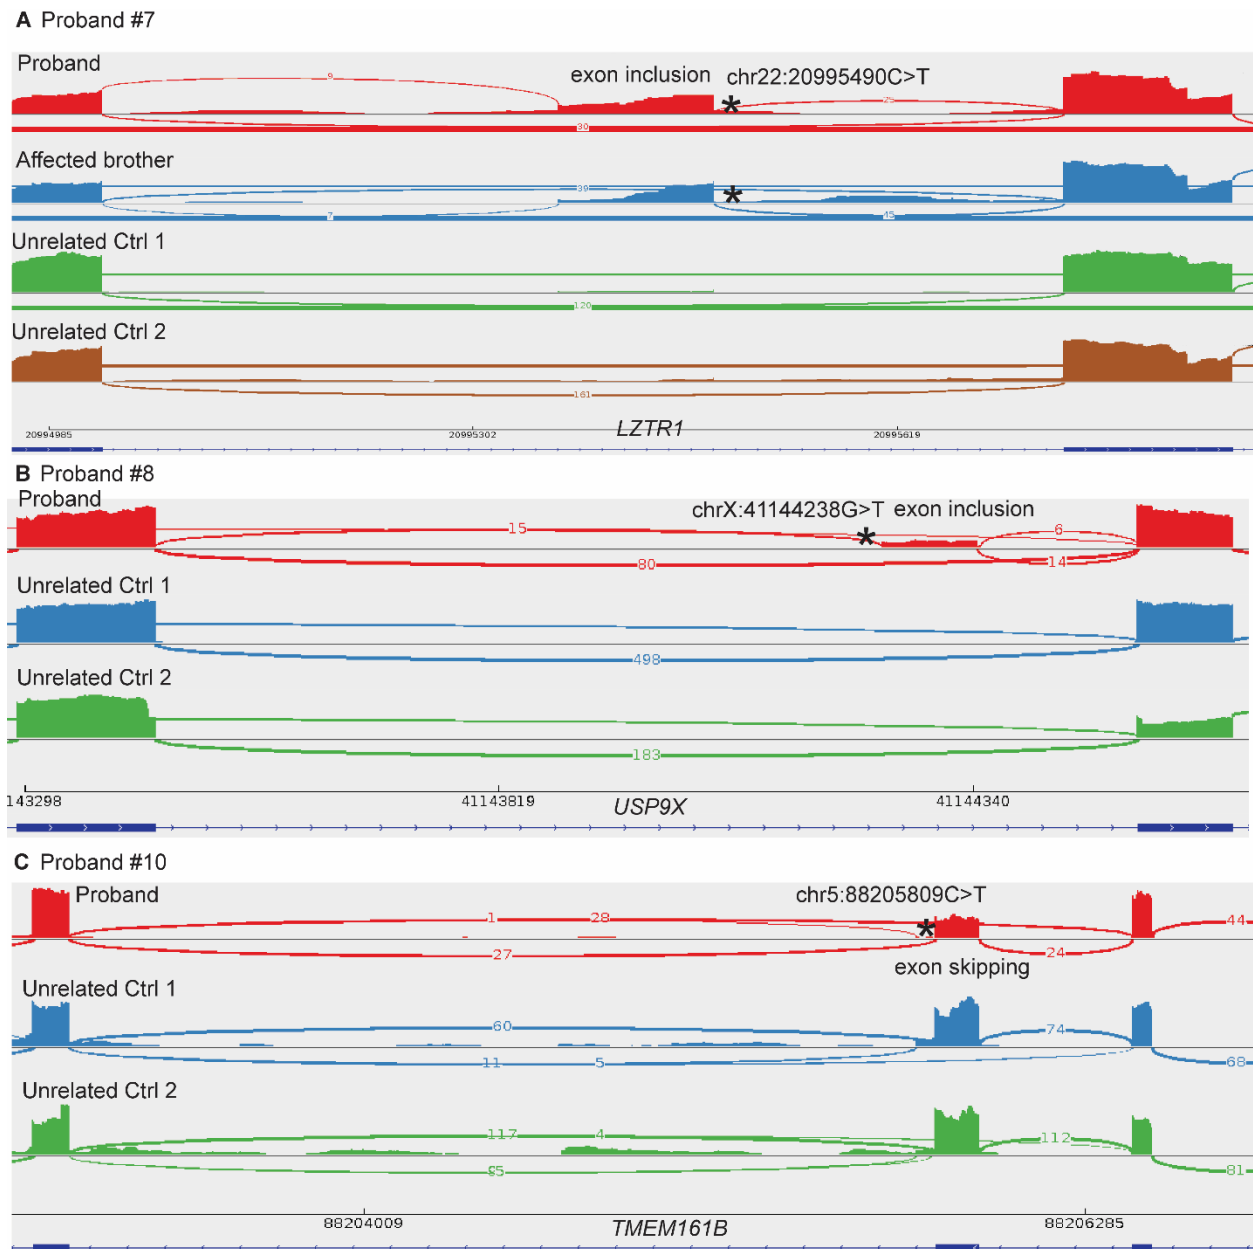

**Figure S7. Detection and characterization of aberrant splicing events in *LZTR1* (Proband #7), *USP9X* (Proband #8), and *TMEM161B* (Proband #10).** (A) The presence of an intronic variant in *LZTR1* (NM\_006767.4: c.1943-256C>T) leads to 117nt and 99nt cryptic exon inclusion (r.1942\_1943ins[1942+342\_1943-262/1942+360\_1943-262]) in both the proband and his affected brother. (B) A *de novo* variant in *USP9X* (NM\_001039591.3: c.1315-284G>T) causes 106nt and 110nt cryptic exon inclusion (r.1314\_1315ins[1315-281\_1315-176/1315-

281\_1315-172]). The variant also results in aberrant expression (fold change 0.36). (C) A variant in *TMEM161B* (NM\_153354.5: c.800+5G>A) leads to skipping of exon 8 (141nt) (r.660\_800del). Variants are indicated by asterisk.

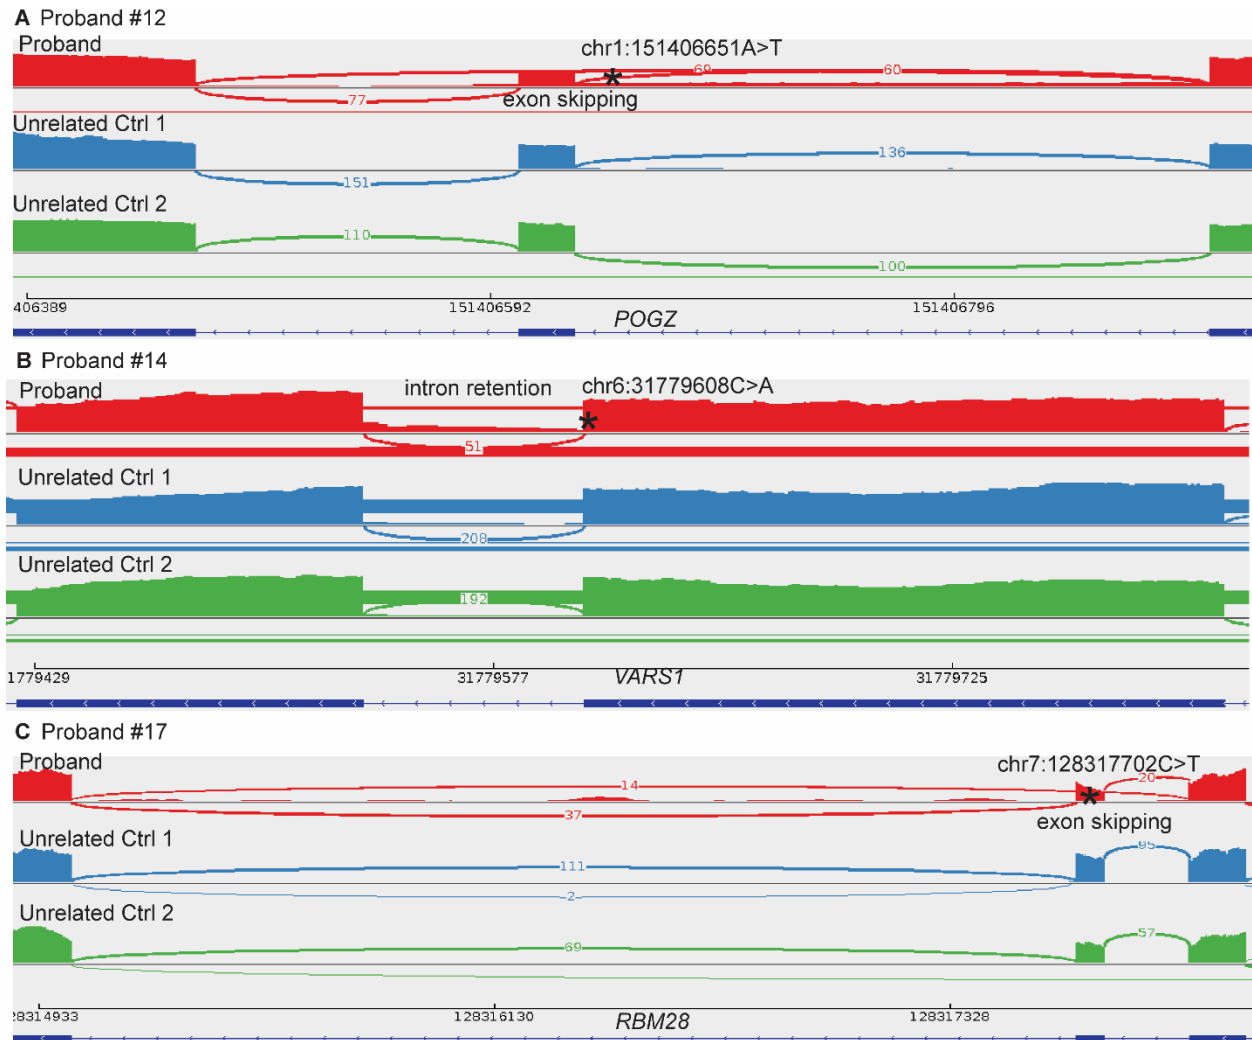

**Figure S8. Identification and characterization of aberrant splicing events in *POGZ***

**(Proband #12), *VARS1* (Proband #14), and *RBM28* (Proband #17).** (A) A *de novo* variant in *POGZ* (NM\_015100.4: c.2546-20T>A) causes skipping of exon 18 (25nt) and retention of introns 17-18 (446nt) (r.2546\_2570del/2545\_2571ins[2545+1\_2546-21,a,2546-19\_2571-1]). (B) A variant in *VARS1* (NM\_006295.3: c.3288G>T) leads to entire intron 27 (71nt) retention (r.3288delins[u,3288+1\_3289-1]). (C) A variant in *RBM28* (NM\_018077.3: c.1745G>A) results in skipping of exon 16 (75nt, r.1714\_1788del). Variants are indicated by asterisk.

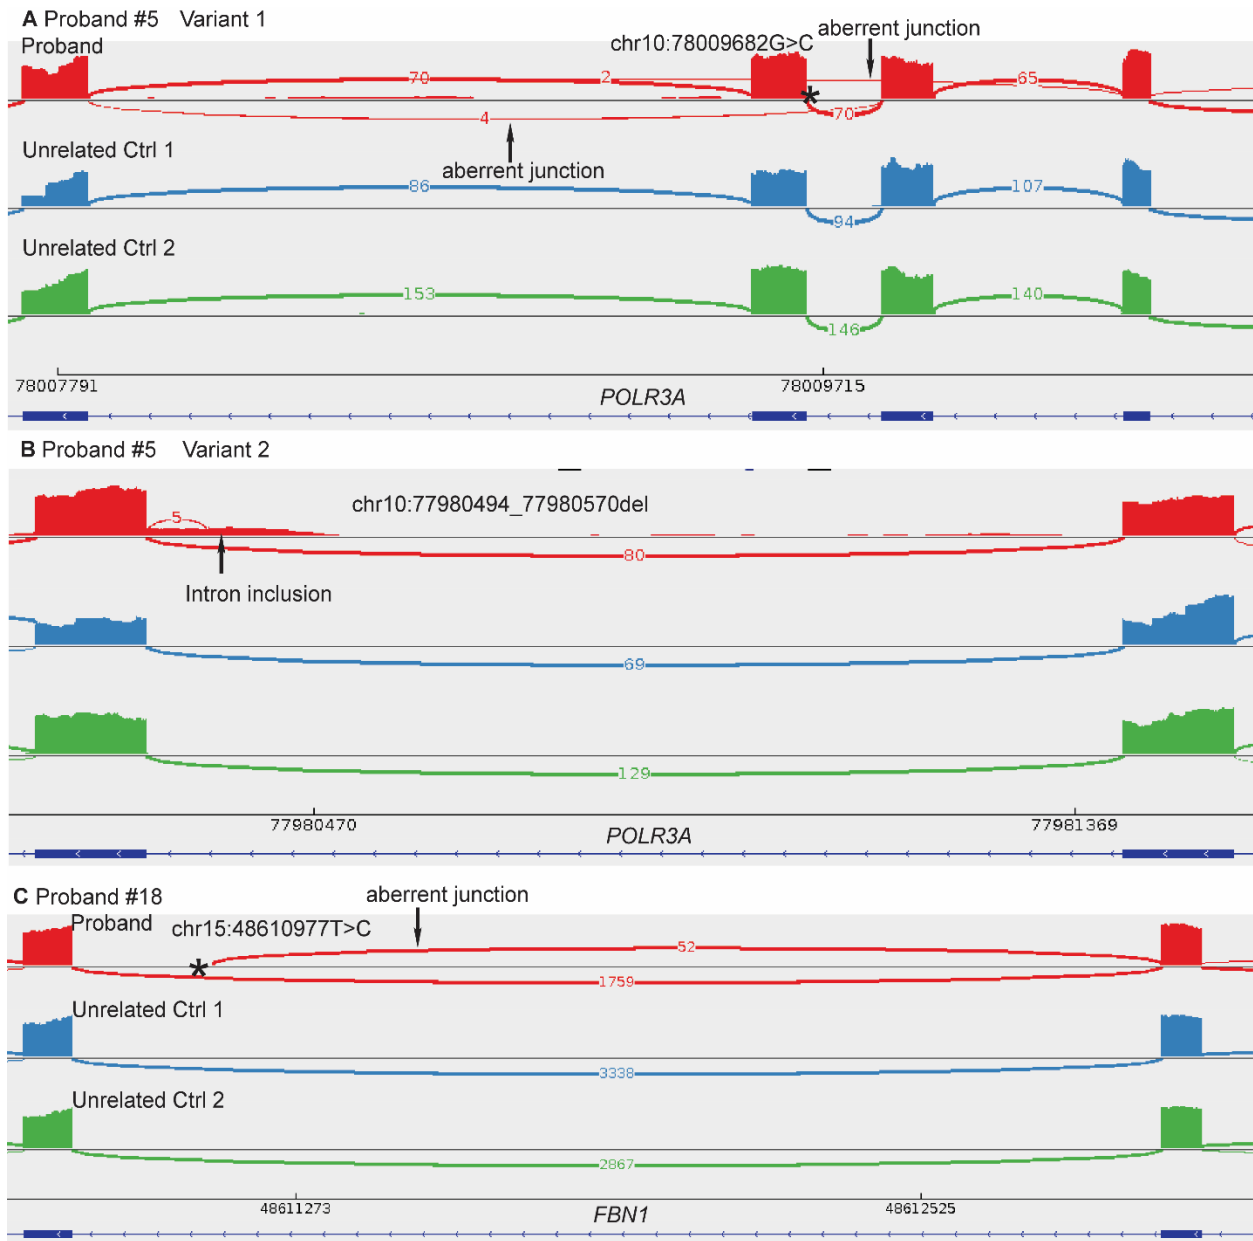

**Figure S9. Detection and characterization of splicing events in two probands, #5 and #18.**

These events were identified manually and not flagged by the DROP pipeline, likely due to the limited presence of aberrant junctions caused by nonsense-mediated decay (NMD). **(A)** The presence of an intronic variant in *POLR3A* (NM\_007055.4: c.1771-7C>G) results in skipping of exon 14 (139nt) and exons13-14 (267nt) (r.1771\_1909del/1643\_1909del). **(B)** Another 76nt intronic deletion in *POLR3A* (NM\_007055.4: c.3892-297\_3892-221del) causes 227nt intron

inclusion at splice acceptor and 154nt cryptic exon inclusion from intron 29

(r.3891\_3892ins[3892-1\_3892-227/3892-74\_3892-227]). (C) An intronic variant in *FBNI*

(NM\_000138.5: c.248-151A>G) leads to inclusion of cryptic exon (131nt) with premature stop codon likely causing NMD (r.247\_248ins[248-282\_248-152]). Variants are indicated by asterisk or black box (deletion).

A Proband #6 Variant 1

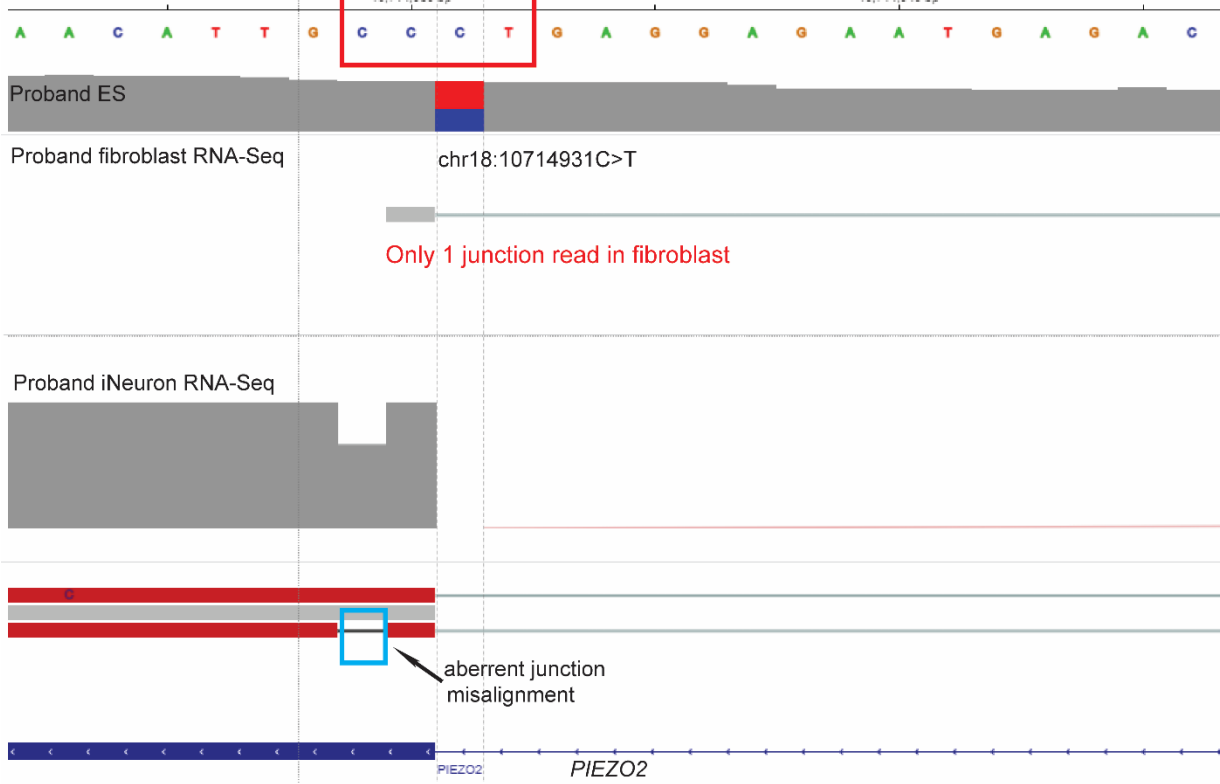

B Proband #6 Variant 2

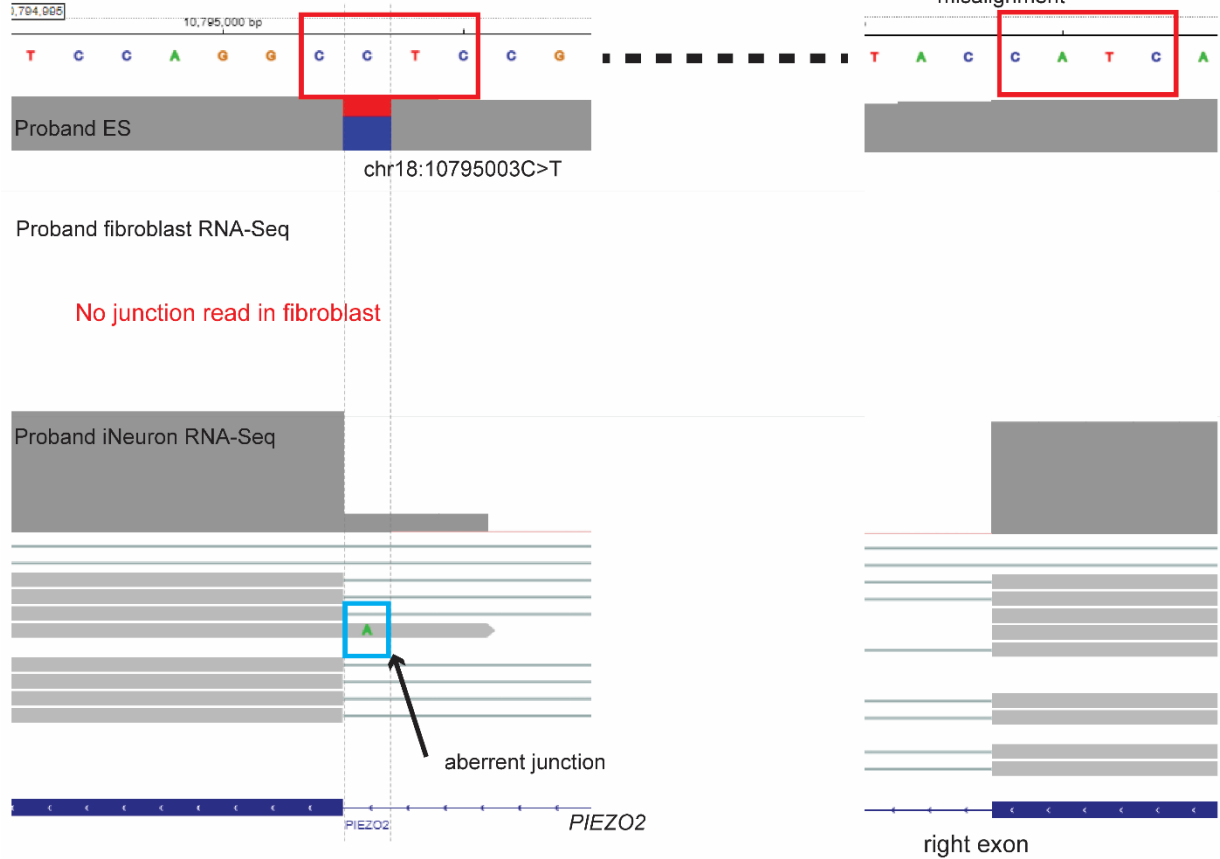



**Figure S10. Aberrant splicing events caused by misalignment and NMD in Proband #6.**

This proband has compound heterozygous variants in *PIEZO2* (NM\_022068.4: c.5257-1G>A and c.1528-1G>A). The first DNA variant C>T (c.5257-1G>A) functions equivalent to moving the splice site to the left by 1nt (r.5258del), resulting in delC. But because there are 3 Cs, STAR treated the junction shift as an indel (**A**). The second DNA variant (c.1528-1G>A) results in a CATC sequence, which is misaligned from the right exon to the left. This variant also results in shifting of the splice site by 1nt (r.1528del) (**B**). Limited junction reads are observed in fibroblast RNA-Seq data.

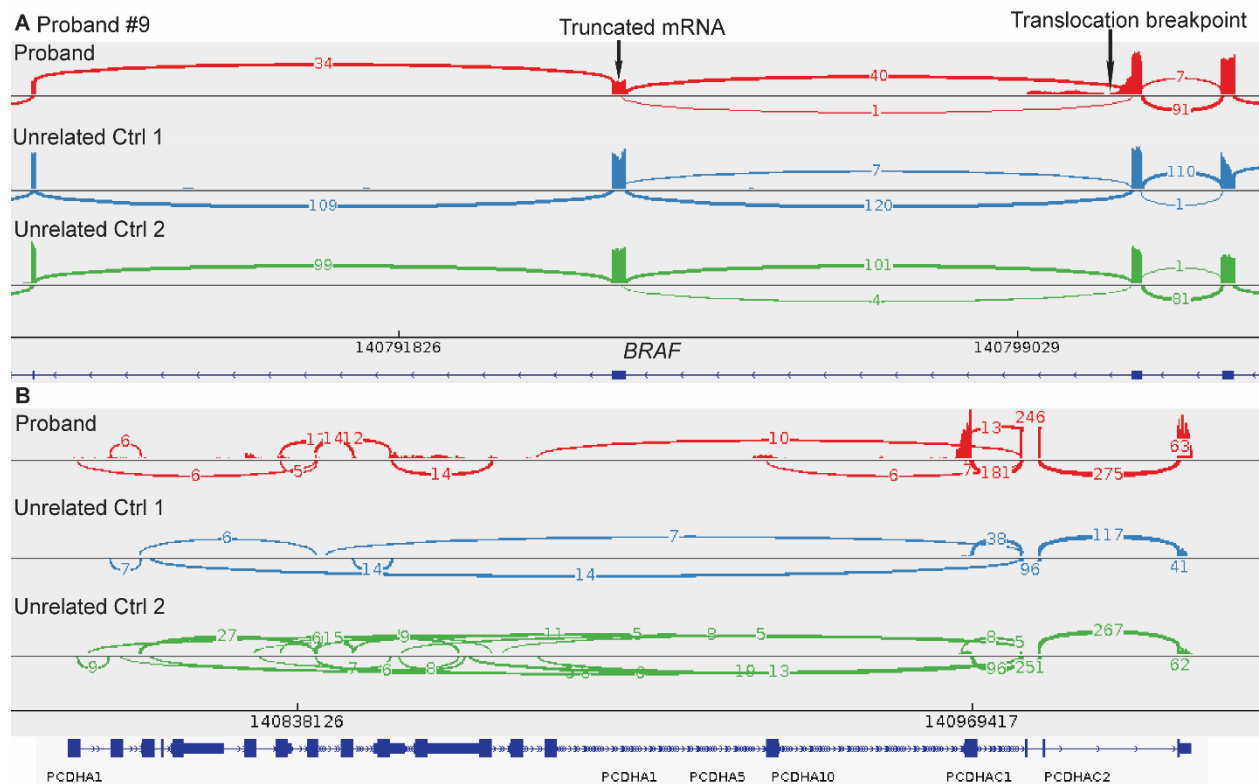

**Figure S11. Translocation of  $t(5;7)(q31.3;q34)$  in Proband #9. (A)  $t(5;7)(q31.3;q34)$  translocation leads to fusion gene of 5' *BRAF* with sequence from 7q34 with uncertain breakpoints; and fusion gene of 5' *BRAF* plus 1225nt intron retention with uncertain sequence from 7q34. (B) The translocation also causes the disruption of the protocadherin-alpha gene cluster.**

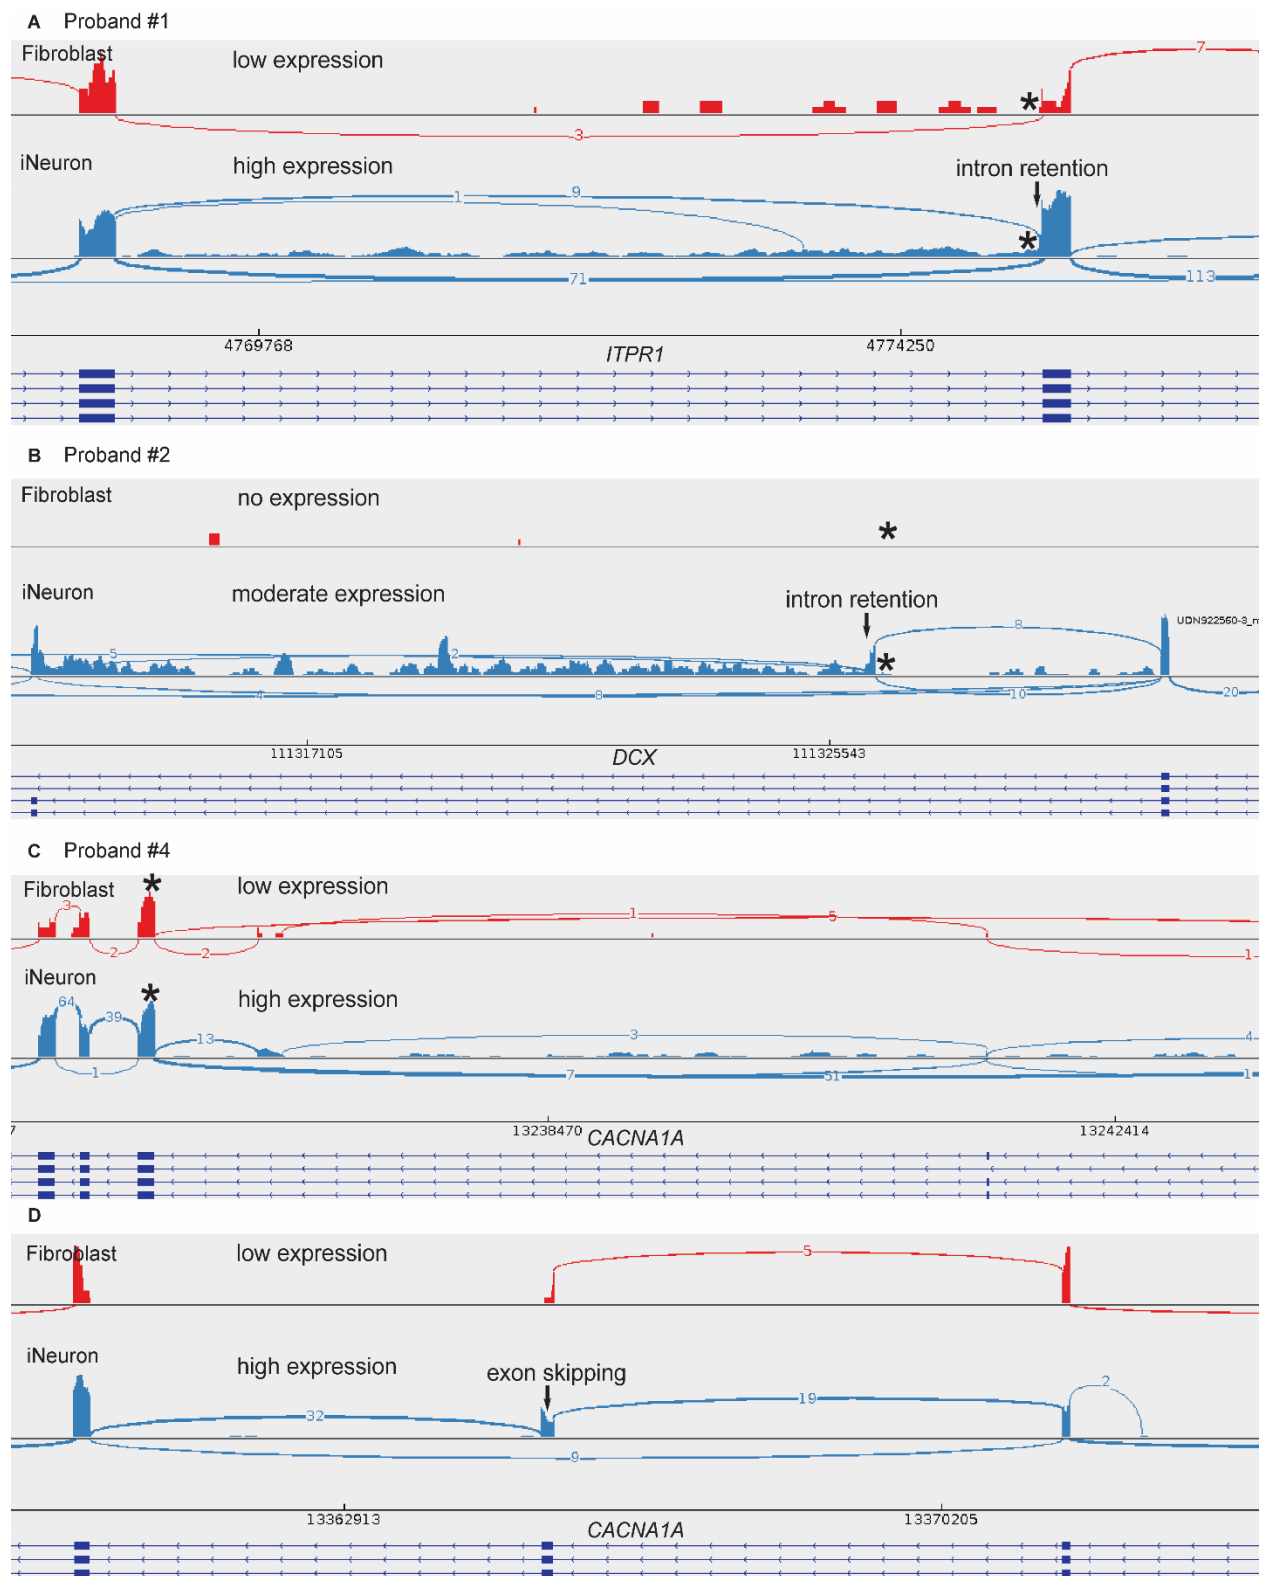

**Figure S12. Detection of aberrant events in iNeuron RNA-Seq data from patient #1, #2, and #4. (A)** 15-nucleotide retention from intron 45 and complete intron 45 retention are uniquely

observed in iNeuron due to the low expression of *ITPR1* in fibroblast. **(B)** Inclusion of a 13,549 bp cryptic exon from intron is exclusively observed in iNeuron as *DCX* is not expressed in fibroblast. **(C)** Skewed expression of the variant allele and exon skipping are only detected in iNeuron owing to the limited expression of *CACNA1A* in fibroblast.

Proband #2

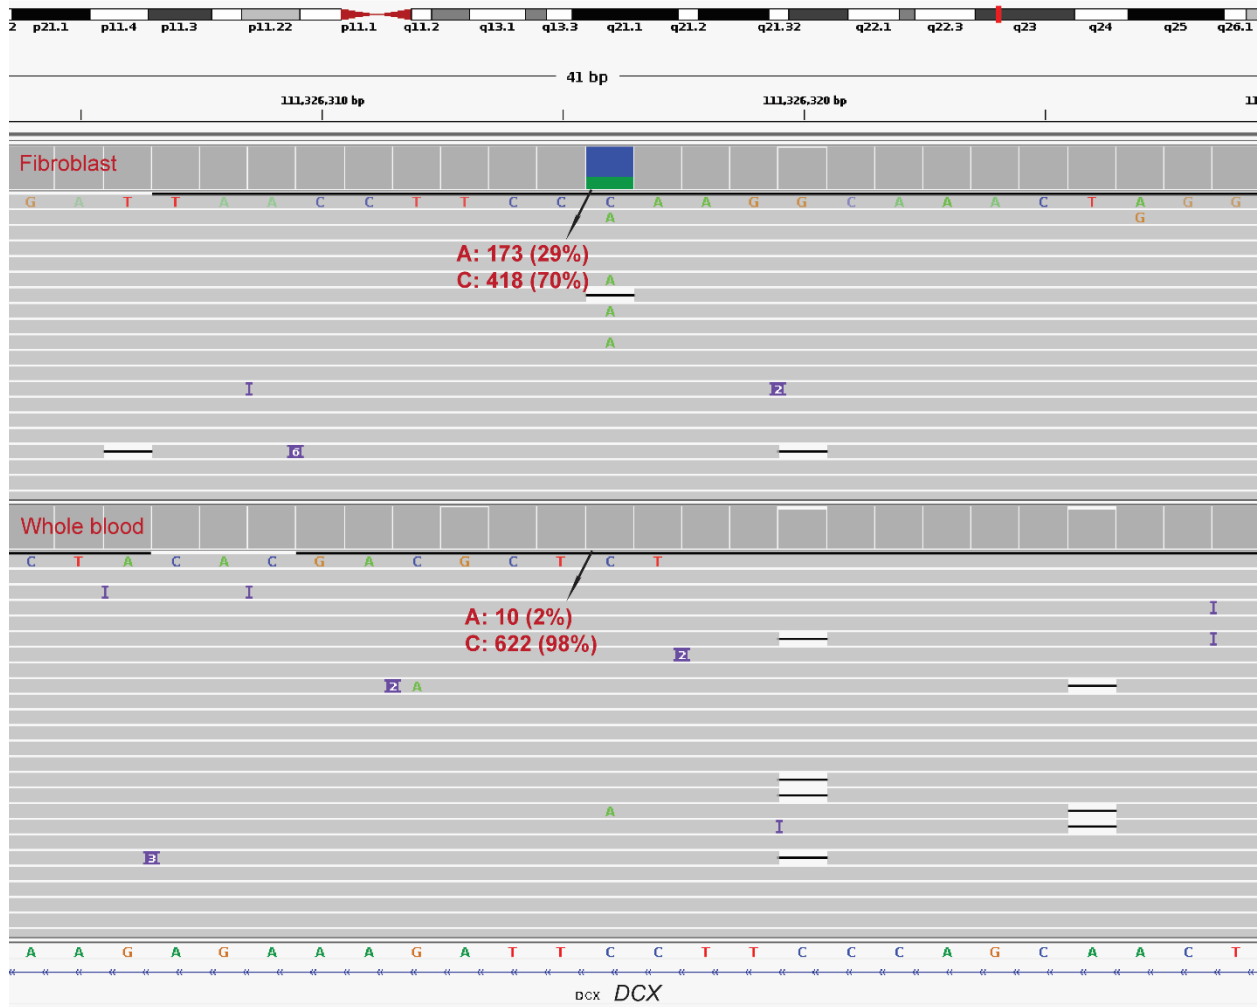

**Figure S13. Amplicon-based next-generation sequencing on the fibroblast and whole blood from the mother of Proband #2. result revealed a variant fraction of 29% in fibroblast and 2% in whole blood.**

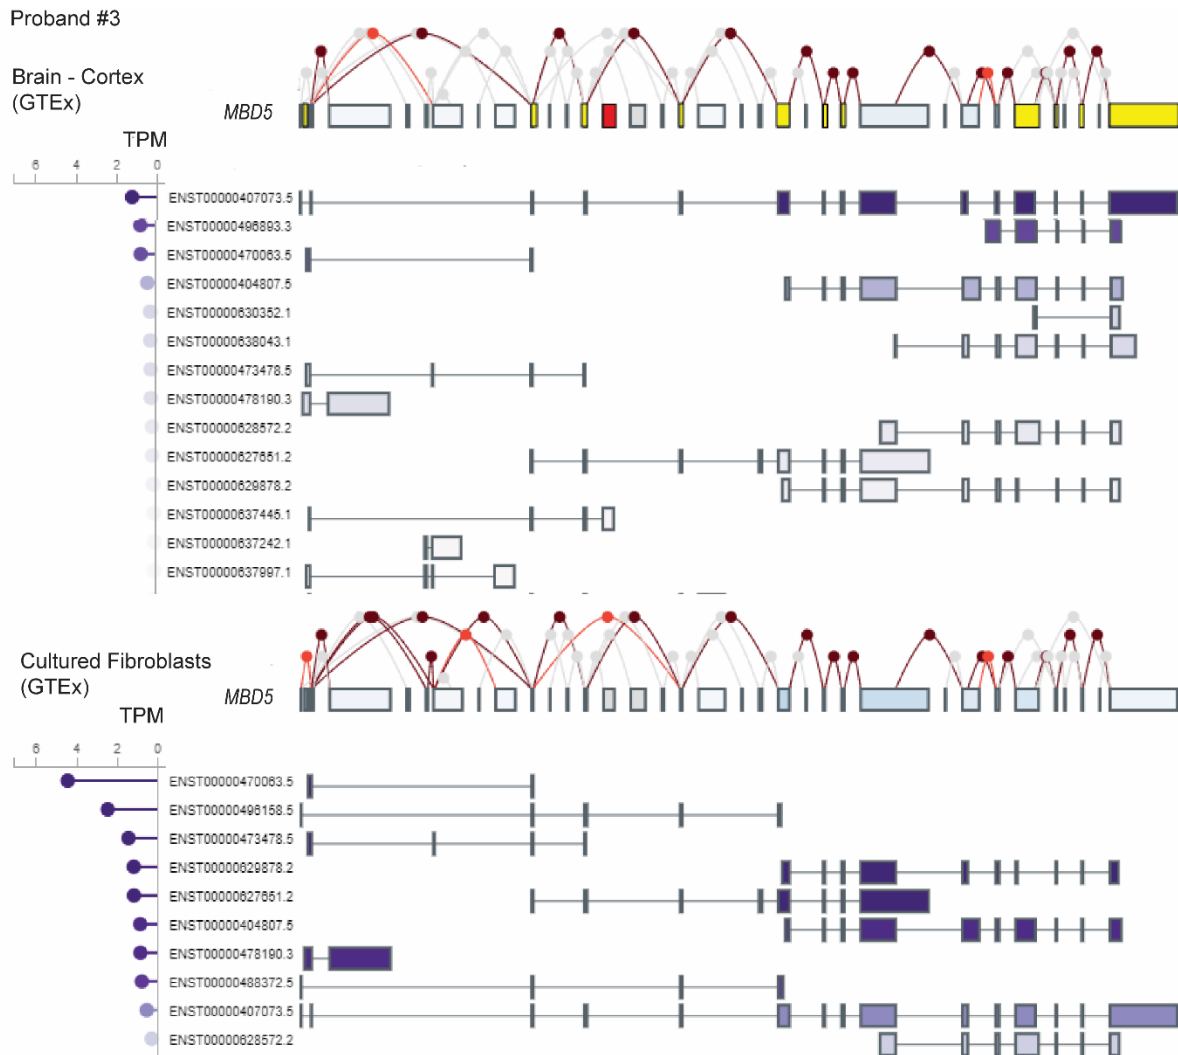

**Figure S14. Identification of 12 neuron-enriched exons in *MBD5* genes.** Although iNeurons and fibroblasts have similar *MBD5* expression, these exons exhibit higher expression in iNeurons and brain cortex (GTEx consortium) when compared to cultured fibroblasts. Neuron-specific exons are represented by red, while neuron-enriched exons are denoted by yellow.

Table S1. Low-expressed genes associated with neurological disorders in CATs

| Panels (Gene Number)              | Proportion of Genes with TPM $\leq$ 1 (%) |              |              |               |
|-----------------------------------|-------------------------------------------|--------------|--------------|---------------|
|                                   | FB<br>(N=77)                              | FB<br>(GTEx) | WB<br>(GTEx) | Muscle (GTEx) |
| Neurological OMIM (2721)          | 20.7                                      | 19.8         | 34.9         | 24.3          |
| Intellectual Disability (1379)    | 16.8                                      | 15.3         | 32.7         | 21.4          |
| Brain Malformation (163)          | 14.7                                      | 14.1         | 36.8         | 22.1          |
| Autism Spectrum Disorder<br>(301) | 22.9                                      | 21.7         | 36.0         | 23.7          |
| Epilepsy (1150)                   | 21.4                                      | 19.6         | 32.6         | 23.6          |
| Ataxia (1282)                     | 22.8                                      | 21.4         | 36.8         | 26.1          |
| Neuropathy (105)                  | 20.0                                      | 14.7         | 32.4         | 21.6          |
| Neuromuscular Disorder<br>(226)   | 23.1                                      | 18.8         | 32.1         | 7.1           |
| Leukodystrophy (709)              | 12.7                                      | 10.4         | 25.5         | 13.9          |

Table S2. Activation of low-expressed genes associated with neurological disorders using four transdifferentiation (21 days' induction) methods

| Panels                  | Proportion of Genes (%) |       |      |      |
|-------------------------|-------------------------|-------|------|------|
|                         | a                       | b     | c    | d    |
| Neuronal Markers        | 89.2                    | 48.2  | 63.3 | 81.9 |
| Neurological OMIM       | 29.6                    | 19.3  | 19.6 | 24.8 |
| Intellectual Disability | 39.6                    | 26.0  | 27.2 | 38.5 |
| Brain Malformation      | 52.2                    | 27.9  | 32.4 | 52.1 |
| Autism Spectrum         |                         |       |      |      |
| Disorder                | 38.8                    | 31.5  | 25.9 | 41.5 |
| Epilepsy                | 37.0                    | 201.1 | 23.0 | 33.1 |
| Ataxia                  | 29.8                    | 20.9  | 18.7 | 27.9 |
| Neuropathy              | 43.4                    | 33.5  | 33.4 | 38.4 |
| Neuromuscular           |                         |       |      |      |
| Disorders               | 17.8                    | 21.7  | 9.8  | 15.9 |
| Leukodystrophy          | 36.6                    | 21.4  | 29.7 | 33.2 |

a) overexpression of the pro-neuronal transcription factors *NEUROG2* and *ASCL1*; b) co-expression of the microRNA *miR-9/9\**, *miR-124*, and the anti-apoptotic gene *BCL2L1*; c) a and b; d) overexpression of DBD-REST-VP16, involving the replacement of *REST/NRSF* repressor domains with the activation domain of the viral activator VP16.



Table S3. Activation of low-expressed genes associated with neurological disorders at different induction time point

| Panels                   | Proportion of Genes (%) |       |       |
|--------------------------|-------------------------|-------|-------|
|                          | a-D14                   | a-D21 | a-D28 |
| Neuronal Markers         | 70.5                    | 89.2  | 89.2  |
| Neurological OMIM        | 22.2                    | 29.6  | 28.7  |
| Intellectual Disability  | 30.1                    | 39.6  | 39.1  |
| Brain Malformation       | 44.3                    | 52.2  | 48.5  |
| Autism Spectrum Disorder | 33.0                    | 38.8  | 40.1  |
| Epilepsy                 | 27.9                    | 37.0  | 36.8  |
| Ataxia                   | 23.0                    | 29.8  | 29.3  |
| Neuropathy               | 38.4                    | 43.4  | 47.5  |
| Neuromuscular Disorders  | 13.8                    | 17.8  | 15.9  |
| Leukodystrophy           | 29.2                    | 36.6  | 34.4  |

a) overexpression of the pro-neuronal transcription factors *NEUROG2* and *ASCL1*. D14: 14 days after induction; D21: 21 days after induction; D28: 28 days after induction.

Table S4. Activated and actionable genes associated with neurological disorders in iNeurons compared to whole blood

| Category                       | N of low-expression genes in whole blood | Activated and Actionable in iN |      |
|--------------------------------|------------------------------------------|--------------------------------|------|
|                                |                                          | N                              | %    |
| Neurological OMIM              | 909                                      | 520                            | 57.2 |
| Intellectual Disability Panel  | 449                                      | 293                            | 65.2 |
| Brain Malformation Panel       | 60                                       | 44                             | 73.3 |
| Autism Spectrum Disorder Panel | 108                                      | 67                             | 62.3 |
| Epilepsy Panel                 | 373                                      | 215                            | 57.6 |
| Ataxia Panel                   | 470                                      | 268                            | 57.0 |
| Neuropathy Panel               | 33                                       | 19                             | 57.6 |
| Neuromuscular Disorders Panel  | 72                                       | 35                             | 48.6 |
| Leukodystrophy Panel           | 178                                      | 135                            | 75.8 |

Table S5. Successful transdifferentiation replication in 3 samples (out of 4) with low *ASCL-NEUROG2* expression.

| Sample | Repeat | iN_Score | <i>ASCL1</i> | <i>NEUROG2</i> |
|--------|--------|----------|--------------|----------------|
| #1     | R1     | Failed   | 3.86         | 3.28           |
|        | R2     | Failed   | 366.17       | 456.43         |
| #2     | R1     | Failed   | 53.94        | 50.06          |
|        | R2     | Passed   | 639.59       | 855.04         |
| #3     | R1     | Failed   | 79.95        | 76.30          |
|        | R2     | Passed   | 175.92       | 216.40         |
| #4     | R1     | Failed   | 94.62        | 95.29          |
|        | R2     | Passed   | 781.93       | 999.31         |

Supplemental Data Files 1. Gene Ontology (GO) terms and pathways identified in iNeurons through functional enrichment analysis.

Supplemental Data Files 2. Human Phenotype Ontology (HPO) description for individuals with a molecular diagnosis.

Supplemental Data Files 3. Expression of neuron-enriched/specific exons from OMIM-N genes.

## **Members of the Undiagnosed Diseases Network**

Maria T. Acosta

David R. Adams

Raquel L. Alvarez

Justin Alvey

Aimee Allworth

Ashley Andrews

Euan A. Ashley

Ben Afzali

Carlos A. Bacino

Guney Bademci

Ashok Balasubramanyam

Dustin Baldrige

Jim Bale

Michael Bamshad

Deborah Barbouth

Pinar Bayrak-Toydemir

Anita Beck

Alan H. Beggs

Edward Behrens

Gill Bejerano

Hugo J. Bellen

Jimmy Bennett

Jonathan A. Bernstein

Gerard T. Berry

Anna Bican

Stephanie Bivona

Elizabeth Blue  
John Bohnsack  
Devon Bonner  
Lorenzo Botto  
Lauren C. Briere  
Gabrielle Brown  
Elizabeth A. Burke  
Lindsay C. Burrage  
Manish J. Butte  
Peter Byers  
William E. Byrd  
John Carey  
Olveen Carrasquillo  
Thomas Cassini  
Ta Chen Peter Chang  
Sirisak Chanprasert  
Hsiao-Tuan Chao  
Ivan Chinn  
Gary D. Clark  
Terra R. Coakley  
Laurel A. Cobban  
Joy D. Cogan  
Matthew Coggins  
F. Sessions Cole  
Heather A. Colley  
Heidi Cope  
Rosario Corona  
William J. Craigen

Andrew B. Crouse  
Michael Cunningham  
Precilla D'Souza  
Hongzheng Dai  
Surendra Dasari  
Joie Davis  
Jyoti G. Dayal  
Margaret Delgado  
Esteban C. Dell'Angelica  
Katrina Dipple  
Daniel Doherty  
Naghmeh Dorrani  
Argenia L. Doss  
Emilie D. Douine  
Dawn Earl  
David J. Eckstein  
Lisa T. Emrick  
Christine M. Eng  
Marni Falk  
Elizabeth L. Fieg  
Paul G. Fisher  
Brent L. Fogel  
Irman Forghani  
Jiayu Fu  
William A. Gahl  
Ian Glass  
Page C. Goddard  
Rena A. Godfrey

Alana Grajewski  
Andrea Gropman  
Meghan C. Halley  
Rizwan Hamid  
Neal Hanchard  
Kelly Hassey  
Nichole Hayes  
Frances High  
Anne Hing  
Fuki M. Hisama  
Ingrid A. Holm  
Jason Hom  
Martha Horike-Pyne  
Alden Huang  
Yan Huang  
Sarah Hutchison  
Wendy Introne  
Rosario Isasi  
Kosuke Izumi  
Gail P. Jarvik  
Jeffrey Jarvik  
Suman Jayadev  
Orpa Jean-Marie  
Vaidehi Jobanputra  
Emerald Kaitryn  
Shamika Ketkar  
Dana Kiley  
Gonench Kilich



Shilpa N. Kobren

Isaac S. Kohane

Jennefer N. Kohler

Susan Korrick

Deborah Krakow

Donna M. Krasnewich

Elijah Kravets

Seema R. Lalani

Byron Lam

Christina Lam

Brendan C. Lanpher

Ian R. Lanza

Kimberly LeBlanc

Brendan H. Lee

Roy Levitt

Richard A. Lewis

Pengfei Liu

Xue Zhong Liu

Nicola Longo

Sandra K. Loo

Joseph Loscalzo

Richard L. Maas

Ellen F. Macnamara

Calum A. MacRae

Valerie V. Maduro

AudreyStephannie Maghiro

Rachel Mahoney

May Christine V. Malicdan

Laura A. Mamounas

Teri A. Manolio

Rong Mao

Ronit Marom

Gabor Marth

Beth A. Martin

Martin G. Martin

Julian A. Martínez-Agosto

Shruti Marwaha

Jacob McCauley

Allyn McConkie-Rosell

Alexa T. McCray

Elisabeth McGee

Matthew Might

Danny Miller

Ghayda Mirzaa

Eva Morava

Paolo Moretti

Marie Morimoto

John J. Mulvihill

Mariko Nakano-Okuno

Stanley F. Nelson

Shirley Nieves-Rodriguez

Donna Novacic

Devin Oglesbee

James P. Orengo

Laura Pace

Stephen Pak

J. Carl Pallais  
Jeanette C. Papp  
Neil H. Parker  
Leoyklang Petcharet  
John A. Phillips III  
Jennifer E. Posey  
Lorraine Potocki  
Barbara N. Pusey Swerdzewski  
Aaron Quinlan  
Deepak A. Rao  
Anna Raper  
Wendy Raskind  
Genecee Renteria  
Chloe M. Reuter  
Lynette Rives  
Amy K. Robertson  
Lance H. Rodan  
Jill A. Rosenfeld  
Elizabeth Rosenthal  
Francis Rossignol  
Maura Ruzhnikov  
Marla Sabaii  
Ralph Sacco  
Jacinda B. Sampson  
Mario Saporta  
Judy Schaechter  
Timothy Schedl  
Kelly Schoch

Daryl A. Scott

Elaine Seto

Prashant Sharma

Vandana Shashi

Emily Shelkowitz

Sam Sheppard

Jimann Shin

Edwin K. Silverman

Janet S. Sinsheimer

Kathy Sisco

Edward C. Smith

Kevin S. Smith

Lilianna Solnica-Krezel

Ben Solomon

Rebecca C. Spillmann

Andrew Stergachis

Joan M. Stoler

Kathleen Sullivan

Jennifer A. Sullivan

Shirley Sutton

David A. Sweetser

Virginia Sybert

Holly K. Tabor

Queenie K.-G. Tan

Amelia L. M. Tan

Arjun Tarakad

Mustafa Tekin

Fred Telischi

Willa Thorson  
Cynthia J. Tifft  
Camilo Toro  
Alyssa A. Tran  
Rachel A. Ungar  
Tiina K. Urv  
Adeline Vanderver  
Matt Velinder  
Dave Viskochil  
Tiphonie P. Vogel  
Colleen E. Wahl  
Melissa Walker  
Nicole M. Walley  
Jennifer Wambach  
Jijun Wan  
Lee-kai Wang  
Michael F. Wangler  
Patricia A. Ward  
Daniel Wegner  
Monika Weisz Hubshman  
Mark Wener  
Tara Wenger  
Monte Westerfield  
Matthew T. Wheeler  
Jordan Whitlock  
Lynne A. Wolfe  
Kim Worley  
Shinya Yamamoto

Zhe Zhang

Stephan Zuchner
